# Supplementary material for: Direct difunctional carbonylation of terminal alkynes with sodium sulfinates to access olefin sulfonyl methyl esters under metal-free conditions
Source: Royal Society of Chemistry journal article supplement (doi:10.1039/d2qo01311h), 2022-01-01

## Supporting Information

### **Direct carbonylative difunctional of terminal alkynes with sodium sulfinates to access olefin sulfonyl methyl esters under metal-free conditions**

**Bo Chen<sup>a</sup>, Han Yin<sup>a</sup>, Zhi-Peng Bao,<sup>a,b</sup> Chang-Sheng Kuai<sup>a</sup> and Xiao-Feng Wu<sup>\*a,b</sup>**

---

<sup>a</sup> *Dalian National Laboratory for Clean Energy, Dalian Institute of Chemical Physics, Chinese Academy of Sciences, Dalian, Liaoning, China,*

*e-mail: xwu2020@dicp.ac.cn*

<sup>b</sup> *Leibniz-Institut für Katalyse e.V., 18059 Rostock, Germany*

## 1 General information

### Reagents, solvents and analytical methods:

Unless otherwise noted, all reactions were carried out under a carbon monoxide or nitrogen atmosphere. All reagents were commercially available. All solvents were dried by standard techniques, and distilled prior to use. Column chromatography was performed on silica gel (200-300 meshes) using petroleum ether (b. p. 30-60 °C) and ethyl acetate as eluent.  $^1\text{H}$  and  $^{13}\text{C}$  NMR spectra were taken on Bruker AVANCE III 400 MHz spectrometers and  $\text{CDCl}_3$  ( $^1\text{H}$  NMR  $\delta$  7.26,  $^{13}\text{C}$  NMR  $\delta$  77.0) as solvent. All coupling constants ( $J$ ) are reported in Hz with the following abbreviations: s = singlet, d = doublet, dd = double doublet, t = triplet, dt = double triplet, q = quatriplet, m = multiplet, br = broad. Gas chromatography (GC) analyses were performed on an Agilent HP-7890A instrument with a FID detector and HP-5 capillary column (polydimethylsiloxane with 5% phenyl groups, 30 m, 0.32 mm i.d. 0.25  $\mu\text{m}$  film thickness) using argon as carrier gas. Gas chromatography mass spectrometer (GC-MS) analyses were performed on an Shimadzu QP2020 NX instrument. High resolution mass spectra (HRMS) were recorded on Agilent 8890-7250 and Agilent Q-TOF 6540.

Because of the high toxicity of carbon monoxide, all of the reactions should be performed in an autoclave. The laboratory should well-equipped with a CO detector and alarm system.

## 2 Optimization of reaction conditions

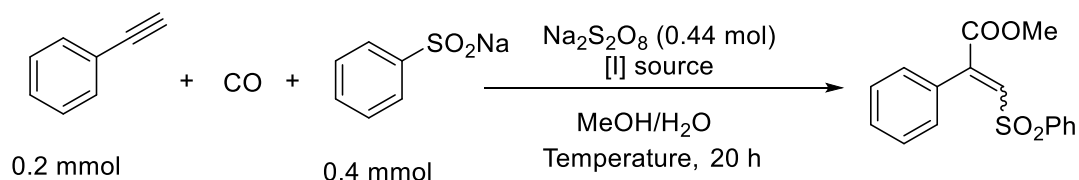

| Entry | [I] source   | solvent                                 | temperature | CO pressure | Yield % <sup>a</sup> |
|-------|--------------|-----------------------------------------|-------------|-------------|----------------------|
| 1     | KI (10 mol%) | MeOH (1.6 mL)/H <sub>2</sub> O (0.4 mL) | 110°C       | 60 bar      | trace                |
| 2     | KI (50 mol%) | MeOH (1.6 mL)/H <sub>2</sub> O (0.4 mL) | 110°C       | 60 bar      | 39                   |
| 3     | KI (1.5 eq.) | MeOH (1.6 mL)/H <sub>2</sub> O (0.4 mL) | 110°C       | 60 bar      | 61                   |
| 4     | KI (2 eq.)   | MeOH (1.6 mL)/H <sub>2</sub> O (0.4 mL) | 110°C       | 60 bar      | 54                   |
| 5     | KI (3 eq.)   | MeOH (1.6 mL)/H <sub>2</sub> O (0.4 mL) | 110°C       | 60 bar      | trace                |
| 6     | KI (1.5 eq.) | MeOH (2.0 mL)                           | 110°C       | 60 bar      | ND                   |

|    |                                                                     |                                                              |       |        |                       |
|----|---------------------------------------------------------------------|--------------------------------------------------------------|-------|--------|-----------------------|
| 7  | KI (1.5 eq.)                                                        | MeOH (1.9 mL)/H <sub>2</sub> O (0.1 mL)                      | 110°C | 60 bar | trace                 |
| 8  | KI (1.5 eq.)                                                        | MeOH (1.8 mL)/H <sub>2</sub> O (0.2 mL)                      | 110°C | 60 bar | trace                 |
| 9  | KI (1.5 eq.)                                                        | MeOH (1.0 mL)/H <sub>2</sub> O (1.0 mL)                      | 110°C | 60 bar | 55                    |
| 10 | KI (1.5 eq.)                                                        | 1,4-dioxane (1.0 mL)/MeOH (0.5 mL)/H <sub>2</sub> O (0.5 mL) | 110°C | 60 bar | trace                 |
| 11 | KI (1.5 eq.)                                                        | 1,4-dioxane (1.5 mL)/MeOH (0.2 mL)/H <sub>2</sub> O (0.2 mL) | 110°C | 60 bar | trace                 |
| 12 | KI (1.5 eq.)                                                        | MeOH (1.6 mL)/H <sub>2</sub> O (0.4 mL)                      | 90°C  | 60 bar | trace                 |
| 13 | KI (1.5 eq.)                                                        | MeOH (1.6 mL)/H <sub>2</sub> O (0.4 mL)                      | 130°C | 60 bar | 64                    |
| 14 | KI (1.5 eq.)                                                        | MeOH (1.6 mL)/H <sub>2</sub> O (0.4 mL)                      | 130°C | 40 bar | 81                    |
| 15 | KI (1.5 eq.)                                                        | MeOH (1.6 mL)/H <sub>2</sub> O (0.4 mL)                      | 130°C | 20 bar | 71                    |
| 16 | KI (1.5 eq.)                                                        | MeOH (1.6 mL)/H <sub>2</sub> O (0.4 mL)                      | 130°C | 10 bar | 43                    |
| 17 | CaI (1.5 eq.)                                                       | MeOH (1.6 mL)/H <sub>2</sub> O (0.4 mL)                      | 130°C | 40 bar | 33                    |
| 18 | NaI (1.5 eq.)                                                       | MeOH (1.6 mL)/H <sub>2</sub> O (0.4 mL)                      | 130°C | 40 bar | 79                    |
| 19 | LiI (1.5 eq.)                                                       | MeOH (1.6 mL)/H <sub>2</sub> O (0.4 mL)                      | 130°C | 40 bar | 80                    |
| 20 | TBAI (1.5 eq.)                                                      | MeOH (1.6 mL)/H <sub>2</sub> O (0.4 mL)                      | 130°C | 40 bar | 62                    |
| 21 | I <sub>2</sub> (1.5 eq.)                                            | MeOH (1.6 mL)/H <sub>2</sub> O (0.4 mL)                      | 130°C | 40 bar | trace                 |
| 22 | KI (1.5 eq.)/[1.2 eq. PhSO <sub>2</sub> Na]                         | MeOH (1.6 mL)/H <sub>2</sub> O (0.4 mL)                      | 130°C | 40 bar | 30                    |
| 23 | KI (1.5 eq.)/[1.5 eq. PhSO <sub>2</sub> Na]                         | MeOH (1.6 mL)/H <sub>2</sub> O (0.4 mL)                      | 130°C | 40 bar | 51                    |
| 24 | KI (1.1 eq.)                                                        | MeOH (1.6 mL)/H <sub>2</sub> O (0.4 mL)                      | 130°C | 40 bar | 80 (68 <sup>b</sup> ) |
| 25 | LiI (1.1 eq.)                                                       | MeOH (1.6 mL)/H <sub>2</sub> O (0.4 mL)                      | 130°C | 40 bar | 79                    |
| 26 | KI (1.1 eq.)/[K <sub>2</sub> S <sub>2</sub> O <sub>8</sub> 2.2 eq.] | MeOH (1.6 mL)/H <sub>2</sub> O (0.4 mL)                      | 130°C | 40 bar | 61                    |

|    |                                                                                      |                                         |       |        |    |
|----|--------------------------------------------------------------------------------------|-----------------------------------------|-------|--------|----|
| 27 | KI (1.1 eq.)/[(NH <sub>4</sub> ) <sub>2</sub> S <sub>2</sub> O <sub>8</sub> 2.2 eq.] | MeOH (1.6 mL)/H <sub>2</sub> O (0.4 mL) | 130°C | 40 bar | 41 |
| 28 | I <sub>2</sub> (0.5 eq.)                                                             | MeOH (1.6 mL)/H <sub>2</sub> O (0.4 mL) | 130°C | 40 bar | 72 |
| 29 | KI (1.1 eq.)/[H <sub>2</sub> O <sub>2</sub> 5.0 eq.]                                 | MeOH (1.6 mL)/H <sub>2</sub> O (0.4 mL) | 130°C | 40 bar | ND |
| 30 | KI (1.1 eq.)/[Ag <sub>2</sub> CO <sub>3</sub> 2.2 eq.]                               | MeOH (1.6 mL)/H <sub>2</sub> O (0.4 mL) | 130°C | 40 bar | ND |
| 31 | KI (1.1 eq.)/[BQ 2.2 eq.]                                                            | MeOH (1.6 mL)/H <sub>2</sub> O (0.4 mL) | 130°C | 40 bar | ND |
| 32 | KI (1.1 eq.)/[Mn(OAc) <sub>3</sub> 2H <sub>2</sub> O 2.2 eq.]                        | MeOH (1.6 mL)/H <sub>2</sub> O (0.4 mL) | 130°C | 40 bar | ND |
| 33 | KI (1.1 eq.)/[Oxone 2.2 eq.]                                                         | MeOH (1.6 mL)/H <sub>2</sub> O (0.4 mL) | 130°C | 40 bar | 20 |
| 34 | KI (1.1 eq.)/[PhI(OAc) <sub>2</sub> 2.2 eq.]                                         | MeOH (1.6 mL)/H <sub>2</sub> O (0.4 mL) | 130°C | 40 bar | ND |

a) The yields were determined by GC using hexadecane as the internal standard. b) Isolated yield.

### 3 General procedure

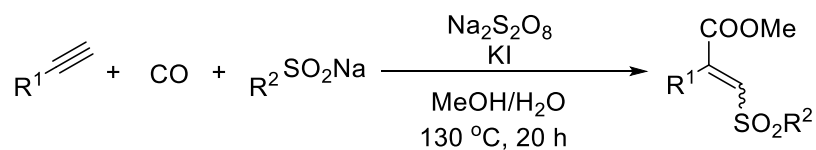

A 4 mL screw-cap vial was charged with alkynes (0.2 mmol), sodium sulfinates (0.4 mmol), Na<sub>2</sub>S<sub>2</sub>O<sub>8</sub> (0.44 mmol, 105 mg), KI (0.22 mmol, 36 mg) and an oven-dried stirring bar. The vial was closed with a Teflon septum and cap and connected to the atmosphere via a needle. After MeOH (1.6 mL) and water (0.4 mL) were added with a syringe under N<sub>2</sub> atmosphere, the vial was moved to an alloy plate and put into a Parr 4560 series autoclave (300 mL) under N<sub>2</sub> atmosphere. At room temperature, the autoclave was flushed with CO three times and charged with 40 bar CO. The autoclave was placed on a heating plate equipped with a magnetic stirrer. The reaction mixture was heated to 130 °C for 20 h. The reaction mixture was then diluted with EtOAc, filtered through silica gel with copious washings (Et<sub>2</sub>O or EtOAc), concentrated, and purified by column chromatography.

### 4 failed examples

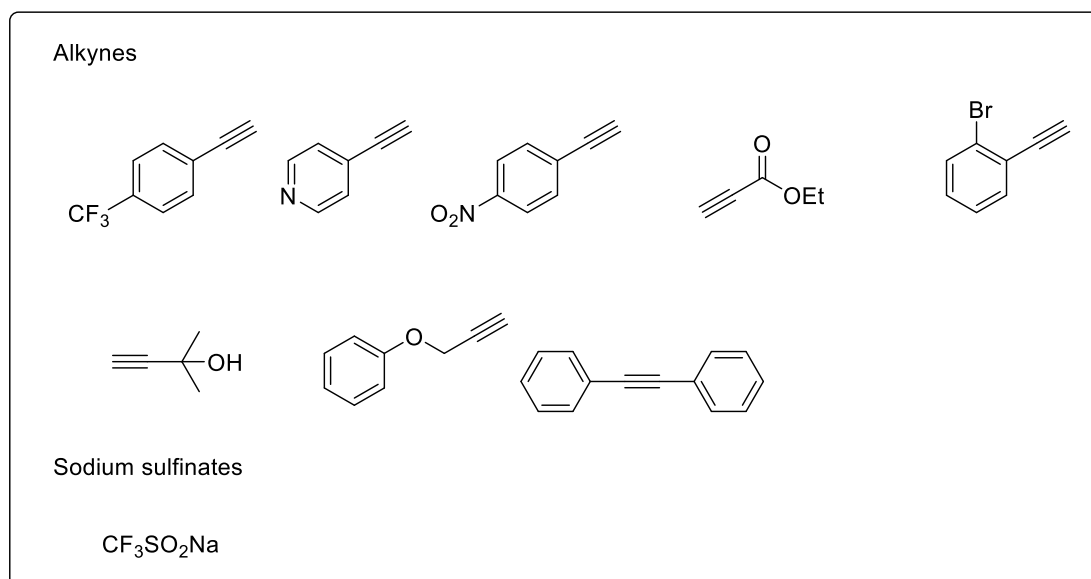

## 5 Millimole Scale Experiment

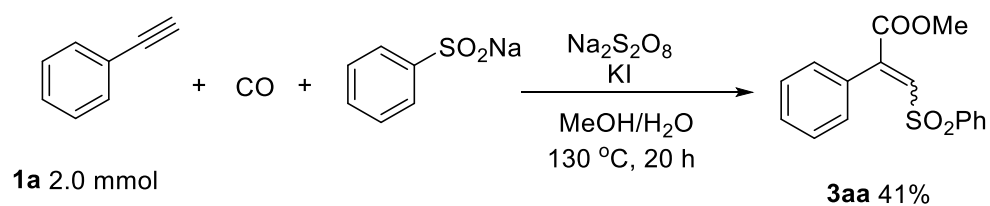

A 100 mL beaker was charged with ethynylbenzene (2.0 mmol), sodium benzenesulfinate (4 mmol),  $\text{Na}_2\text{S}_2\text{O}_8$  (4.4 mmol, 1050 mg), KI (2.2 mmol, 360 mg) and an oven-dried stirring bar. After MeOH (16 mL) and water (4 mL) were added with a syringe under  $\text{N}_2$  atmosphere, the vial was moved to an alloy plate and put into a Parr 4560 series autoclave (300 mL) under  $\text{N}_2$  atmosphere. At room temperature, the autoclave was flushed with CO three times and charged with 40 bar CO. The autoclave was placed on a heating plate equipped with a magnetic stirrer. The reaction mixture was heated to 130 °C for 20 h. The reaction mixture was then diluted with EtOAc, filtered through silica gel with copious washings, concentrated, and purified by column chromatography (EtOAc/PE = 1:4 v/v), obtained **3aa** 248 mg (yield 41%).

## 6 Spectroscopic data of products

### methyl 2-phenyl-3-(phenylsulfonyl)acrylate

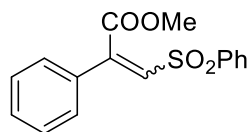

**3aa**, a mixture of *E* and *Z* = 3:1, yellow oil, yield 68%.

**<sup>1</sup>H NMR (700 MHz, Chloroform-*d*)** δ 7.98 – 7.92 (m, 0.65H), 7.51 (s, 1.00H), 7.48 (dd, *J* = 8.4, 1.5 Hz, 2.31H), 7.46 – 7.44 (m, 1.02H), 7.36 – 7.31 (m, 1.60H), 7.29 (tt, *J* = 7.4, 1.6 Hz, 2.96H), 7.22 (dd, *J* = 8.5, 7.0 Hz, 1.96H), 7.08 – 7.03 (m, 1.95H), 6.55 (s, 0.34H) 3.94 (s, 1.01H), 3.69 (s, 3.00H).

**<sup>13</sup>C NMR (176 MHz, CDCl<sub>3</sub>)** δ 166.5, 165.5, 146.1, 143.1, 140.5, 140.2, 139.7, 133.9, 133.7, 132.1, 131.3, 130.8, 129.4, 129.4, 129.3, 129.2, 129.0, 128.0, 127.8, 127.0, 126.5, 53.4, 53.2.

**HRMS (ESI-TOF)** *m/z*: [M + H]<sup>+</sup> Calcd for C<sub>16</sub>H<sub>14</sub>O<sub>4</sub>S 303.0686; Found: 303.0685.

### methyl 3-(phenylsulfonyl)-2-(*p*-tolyl)acrylate

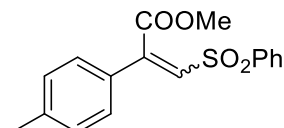

**3ba**, a mixture of *E* and *Z* = 3:1, yellow oil, yield 41%.

**<sup>1</sup>H NMR (400 MHz, Chloroform-*d*)** δ 8.00 – 7.91 (m, 0.6H), 7.55 – 7.50 (m, 2.30H), 7.49 – 7.44 (m, 2.32H), 7.34 – 7.27 (m, 2.11H), 7.23 (d, *J* = 8.3 Hz, 0.79H), 7.11 (d, *J* = 8.2 Hz, 0.68H), 7.04 (d, *J* = 8.0 Hz, 2.04H), 6.98 (d, *J* = 8.2 Hz, 2.05H), 6.52 (s, 0.30H), 3.94 (s, 0.88H), 3.69 (s, 3.00H), 2.30 (s, 2.99H), 2.28 (s, 0.87H).

**<sup>13</sup>C NMR (101 MHz, CDCl<sub>3</sub>)** δ 166.6, 165.7, 143.1, 142.0, 140.4, 139.9, 139.9, 139.5, 133.8, 133.6, 129.9, 129.4, 129.4, 128.9, 128.5, 128.0, 128.0, 127.9, 127.0, 125.3, 53.4, 53.1, 21.5, 21.4.

**HRMS (ESI-TOF)** *m/z*: [M + H]<sup>+</sup> Calcd for C<sub>17</sub>H<sub>16</sub>O<sub>4</sub>S 317.0842; Found: 317.0840.

### methyl 3-(phenylsulfonyl)-2-(*m*-tolyl)acrylate

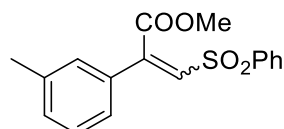

**3ca**, a mixture of *E* and *Z* = 3:1, yellow oil, yield 57%.

**<sup>1</sup>H NMR (400 MHz, Chloroform-*d*)** δ 7.99 – 7.90 (m, 0.70H), 7.52 – 7.41 (m, 4.70H), 7.32 – 7.24 (m, 2.22H), 7.21 – 7.06 (m, 3.83H), 6.87 (dt, *J* = 7.3, 1.8 Hz, 0.99H), 6.74 (d, *J* = 2.0 Hz, 0.99H), 6.53 (s, 0.35H), 3.94 (s, 1.00H), 3.69 (s, 3.00H), 2.26 (s, 1.09H), 2.20 (s, 3.01H).

**<sup>13</sup>C NMR (101 MHz, CDCl<sub>3</sub>)** δ 166.5, 165.6, 146.3, 143.3, 140.4, 140.3, 139.8, 139.1, 137.4, 133.8, 133.5, 132.1, 132.0, 130.7, 130.0, 129.7, 129.4, 129.1, 128.8, 128.1, 128.0, 127.7, 127.5, 126.5, 126.3, 124.2, 53.4, 53.2, 21.4, 21.3.

**HRMS (ESI-TOF)** *m/z*: [M + H]<sup>+</sup> Calcd for C<sub>17</sub>H<sub>16</sub>O<sub>4</sub>S 317.0842; Found: 317.0843.

**methyl 2-(4-(tert-butyl)phenyl)-3-(phenylsulfonyl)acrylate**

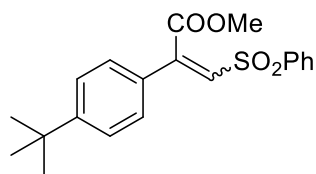

**3da**, a mixture of *E* and *Z* = 10:3, yellow oil, yield 55%.

**<sup>1</sup>H NMR (400 MHz, Chloroform-*d*)** δ 7.98 – 7.91 (m, 0.60H), 7.56 – 7.46 (m, 2.05H), 7.45 – 7.38 (m, 3.15H), 7.35 – 7.26 (m, 1.59H), 7.25 – 7.17 (m, 4.30H), 6.53 (s, 0.28H) 7.01 – 6.94 (m, 1.96H), 3.94 (s, 0.9H), 3.70 (s, 3.00H), 1.25 (s, 9.24H), 1.22 (d, *J* = 3.2 Hz, 2.98H).

**<sup>13</sup>C NMR (101 MHz, CDCl<sub>3</sub>)** δ 166.6, 165.7, 155.1, 152.5, 146.0, 143.3, 140.4, 139.7, 133.8, 133.4, 129.4, 129.3, 128.7, 128.0, 127.9, 127.7, 126.8, 126.2, 125.4, 124.7, 53.3, 53.1, 34.9, 34.7, 31.3, 31.0.

**HRMS (ESI-TOF)** *m/z*: [M + H]<sup>+</sup> Calcd for C<sub>20</sub>H<sub>22</sub>O<sub>4</sub>S 359.1312; Found: 359.1314.

**methyl 2-(4-fluorophenyl)-3-(phenylsulfonyl)acrylate**

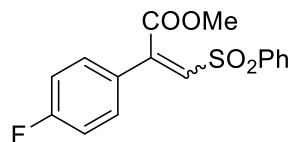

**3ea**, a mixture of *E* and *Z* = 15:1, yellow oil, yield 50%.

**<sup>1</sup>H NMR (400 MHz, Chloroform-*d*)** δ 7.55 – 7.46 (m, 4H), 7.37 – 7.31 (m, 2H), 7.11 – 7.05 (m, 2H), 6.92 (t, *J* = 8.7 Hz, 2H), 3.71 (s, 3H).

**<sup>13</sup>C NMR (101 MHz, CDCl<sub>3</sub>)** δ 165.3, 164.3 (d, *J* = 251.48 Hz), 141.9, 140.8, 139.7, 133.9, 131.6 (d, *J* = 8.39 Hz), 129.1, 128.0, 126.7 (d, *J* = 3.39 Hz), 115.0 (d, *J* = 22.32 Hz), 53.5.

**<sup>19</sup>F NMR (376 MHz, CDCl<sub>3</sub>)** δ -111.15.

**HRMS (ESI-TOF)** *m/z*: [M + H]<sup>+</sup> Calcd for C<sub>16</sub>H<sub>13</sub>FO<sub>4</sub>S 321.0591; Found: 321.0596.

**methyl 2-(2-fluorophenyl)-3-(phenylsulfonyl)acrylate**

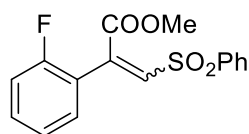

**3fa**, a mixture of *E* and *Z* = 4:1, yellow oil, yield 42%.

**<sup>1</sup>H NMR (400 MHz, Chloroform-*d*)** δ 8.00 – 7.92 (m, 0.61H), 7.62 – 7.47 (m, 4.97H), 7.38 – 7.27 (m, 3.97H), 7.23 (td, *J* = 7.4, 1.8 Hz, 1.19H), 7.11 (td, *J* = 7.5, 1.1 Hz, 1.40H), 6.86 (ddd, *J* = 9.5, 8.3, 1.1 Hz, 1.16H), 6.78 (s, 0.30H), 3.93 (s, 0.85H), 3.70 (s, 3.00H).

**<sup>13</sup>C NMR (101 MHz, CDCl<sub>3</sub>)** δ 168.1, 164.5, 159.4 (d, *J* = 247.49 Hz), 142.0, 139.3, 137.6, 133.9, 131.8 (d, *J* = 2.58 Hz), 131.6 (d, *J* = 8.27 Hz), 129.4, 129.1, 128.1, 128.0, 124.9 (d, *J* = 3.68 Hz), 123.7 (d, *J* = 3.68 Hz), 119.1 (d, *J* = 16.11 Hz), 116.7 (d, *J* = 22.55 Hz), 115.1 (d, *J* = 21.34 Hz), 53.5, 53.3.

**<sup>19</sup>F NMR (376 MHz, CDCl<sub>3</sub>)** δ -111.1, -111.8.

**HRMS (ESI-TOF)** *m/z*: [M + H]<sup>+</sup> Calcd for C<sub>16</sub>H<sub>13</sub>FO<sub>4</sub>S 321.0591; Found: 321.0599.



**methyl 2-(4-chlorophenyl)-3-(phenylsulfonyl)acrylate**

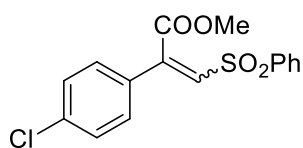

**3ga**, a mixture of *E* and *Z* > 20:1, yellow oil, yield 31%.

**<sup>1</sup>H NMR (400 MHz, Chloroform-*d*)** δ 7.55 – 7.51 (m, 3H), 7.35 (t, *J* = 7.8 Hz, 2H), 7.23 – 7.19 (m, 2H), 7.02 (d, *J* = 8.5 Hz, 2H), 3.71 (s, 3H).

**<sup>13</sup>C NMR (101 MHz, CDCl<sub>3</sub>)** δ 165.1, 141.7, 140.9, 139.6, 135.6, 133.9, 130.9, 129.1, 128.1, 128.0, 53.5.

**HRMS (ESI-TOF)** *m/z*: [M + H]<sup>+</sup> Calcd for C<sub>16</sub>H<sub>13</sub>ClO<sub>4</sub>S 337.0296; Found: 337.0299.

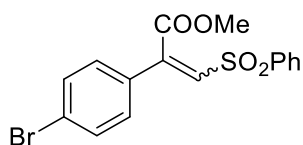

**3ha**, a mixture of *E* and *Z* > 20:1, yellow oil, yield 49%.

**<sup>1</sup>H NMR (400 MHz, Chloroform-*d*)** δ 7.57 – 7.48 (m, 4H), 7.40 – 7.33 (m, 4H), 6.98 – 6.90 (m, 2H), 3.70 (s, 3H).

**<sup>13</sup>C NMR (101 MHz, CDCl<sub>3</sub>)** δ 165.0, 141.7, 140.9, 139.6, 133.9, 129.7, 129.1, 128.0, 123.9, 53.5.

**HRMS (ESI-TOF)** *m/z*: [M + H]<sup>+</sup> Calcd for C<sub>16</sub>H<sub>13</sub>BrO<sub>4</sub>S 380.9791; Found: 380.9787.

**methyl 2-(4-methoxyphenyl)-3-(phenylsulfonyl)acrylate**

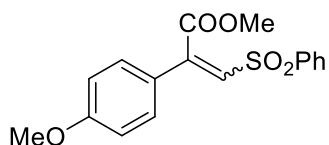

**3ia**, a mixture of *E* and *Z* = 9:4, yellow oil, yield 18%.

**<sup>1</sup>H NMR (400 MHz, Chloroform-*d*)** δ 7.97 – 7.91 (m, 0.87H), 7.56 – 7.50 (m, 2.68H), 7.49 – 7.43 (m, 2.63H), 7.36 – 7.26 (m, 2.95H), 7.10 – 7.03 (m, 2.03H), 6.84 – 6.79 (m, 0.95H), 6.78 – 6.73 (m, 2.04H), 6.46 (s, 0.44H), 3.95 (s, 1.25H), 3.76 (s, 3.04H), 3.75 (s, 1.33H), 3.71 (s, 3.00H).

**<sup>13</sup>C NMR (101 MHz, CDCl<sub>3</sub>)** δ 165.8, 160.6, 142.8, 140.0, 139.5, 133.7, 133.6, 131.2, 129.3, 128.9, 128.8, 128.0, 127.9, 123.7, 123.0, 114.7, 113.3, 55.5, 55.3, 53.3, 53.1.

**HRMS (ESI-TOF)** *m/z*: [M + H]<sup>+</sup> Calcd for C<sub>17</sub>H<sub>16</sub>O<sub>5</sub>S 333.0791; Found: 333.0790.

**methyl 2-(4-(cyanomethyl)phenyl)-3-(phenylsulfonyl)acrylate**

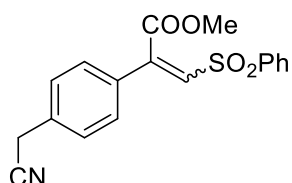

**3ja**, a mixture of *E* and *Z* = 3:2, yellow oil, yield 26%.

**<sup>1</sup>H NMR (400 MHz, Chloroform-*d*)** δ 7.98 – 7.92 (m, 1.47H), 7.58 – 7.49 (m, 6.36H), 7.36 (td, *J* = 6.8, 5.7, 1.7 Hz, 4.54H), 7.30 (d, *J* = 8.3 Hz, 2.00H), 7.22 (d, *J* = 8.0 Hz, 2.46H), 7.15 – 7.09 (m, 2.13H), 6.56 (s, 0.64H), 3.95 (s, 1.91H), 3.71 (s, 5.00H), 3.70 (s, 1.36H).

**<sup>13</sup>C NMR (101 MHz, CDCl<sub>3</sub>)** δ 166.2, 165.2, 145.1, 141.9, 140.8, 140.0, 139.6, 134.0, 134.0, 133.2, 132.1, 131.1, 130.9, 130.2, 129.5, 129.1, 128.8, 128.1, 128.0, 127.8, 127.5, 127.3, 117.4, 117.0, 53.5, 53.3, 23.6, 23.5.

**HRMS (ESI-TOF)** m/z: [M + H]<sup>+</sup> Calcd for C<sub>18</sub>H<sub>15</sub>NO<sub>4</sub>S 342.0795; Found: 342.0796.

#### methyl 2-(4-acetylphenyl)-3-(phenylsulfonyl)acrylate

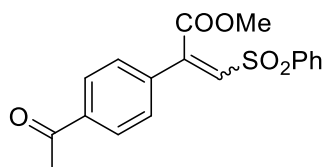

**3ka**, a mixture of *E* and *Z* = 5:2, yellow oil, yield 44%.

**<sup>1</sup>H NMR (400 MHz, Chloroform-*d*)** δ 7.95 (dd, *J* = 8.7, 1.6 Hz, 1.01H), 7.90 – 7.83 (m, 3.24H), 7.59 – 7.48 (m, 5.62H), 7.44 (d, *J* = 8.5 Hz, 0.99H), 7.39 – 7.33 (m, 2.39H), 7.21 (dt, *J* = 9.0, 2.1 Hz, 2.19H), 6.63 (s, 0.46H), 3.96 (s, 1.21H), 3.70 (s, 3.00H), 2.56 (s, 3.01H), 2.52 (s, 1.21H).

**<sup>13</sup>C NMR (101 MHz, CDCl<sub>3</sub>)** δ 197.5, 197.0, 166.0, 164.9, 144.8, 141.7, 140.8, 139.8, 139.6, 138.7, 137.3, 136.3, 135.7, 134.1, 134.1, 129.7, 129.5, 129.2, 129.0, 128.6, 128.1, 128.0, 127.7, 127.3, 53.6, 53.4, 26.7, 26.7.

**HRMS (ESI-TOF)** m/z: [M + H]<sup>+</sup> Calcd for C<sub>18</sub>H<sub>16</sub>O<sub>5</sub>S 345.0791; Found: 345.0794.

#### methyl 3-(phenylsulfonyl)-2-(thiophen-3-yl)acrylate

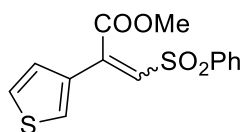

**3la**, a mixture of *E* and *Z* = 10:3, yellow oil, yield 55%.

**<sup>1</sup>H NMR (400 MHz, Chloroform-*d*)** δ 7.98 – 7.89 (m, 0.62H), 7.59 – 7.53 (m, 2.31H), 7.52 – 7.44 (m, 3.58H), 7.43 – 7.39 (m, 0.34H), 7.37 – 7.26 (m, 2.43H), 7.13 (dd, *J* = 5.1, 3.0 Hz, 0.99H), 7.08 – 7.04 (m, 0.35H), 6.83 (dd, *J* = 5.0, 1.3 Hz, 0.97H), 6.05 (s, 0.30H), 3.96 (s, 0.91H), 3.72 (s, 3.00H).

**<sup>13</sup>C NMR (101 MHz, CDCl<sub>3</sub>)** δ 166.4, 165.2, 140.3, 139.7, 138.2, 133.8, 133.7, 130.2, 129.4, 129.2, 128.9, 128.8, 128.2, 127.9, 127.8, 127.7, 125.0, 125.0, 124.7, 53.4, 53.2.

**HRMS (ESI-TOF)** m/z: [M + H]<sup>+</sup> Calcd for C<sub>14</sub>H<sub>12</sub>O<sub>4</sub>S<sub>2</sub> 309.0250; Found: 309.0250.

#### methyl 2-((phenylsulfonyl)methylene)octanoate

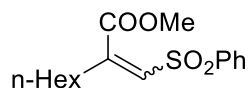

**3ma**, a mixture of *E* and *Z* = 20:3, yellow oil, yield 60%.

**<sup>1</sup>H NMR (400 MHz, Chloroform-*d*)** δ 7.87 (dq, *J* = 7.1, 2.0 Hz, 2.32H), 7.63 – 7.57 (m, 1.04H), 7.53 – 7.48 (m, 2.24H), 7.08 (s, 0.90H), 6.09 (s, 0.16H), 3.84 (s, 0.46H), 3.70 (s, 3.00H), 2.76 (dd, *J* = 8.8, 6.4 Hz, 2.05H), 1.40 – 1.12 (m, 11.00H), 0.81 (t, *J* = 6.7 Hz, 4.17H).

**<sup>13</sup>C NMR (101 MHz, CDCl<sub>3</sub>)** δ 166.0, 145.8, 140.8, 136.7, 134.0, 129.5, 127.7, 52.9, 31.4, 29.4, 29.1, 27.3, 22.5, 14.0.

**HRMS (ESI-TOF)** m/z: [M + H]<sup>+</sup> Calcd for C<sub>16</sub>H<sub>22</sub>O<sub>4</sub>S 311.1312; Found: 311.1316.

### methyl 2-cyclopropyl-3-(phenylsulfonyl)acrylate

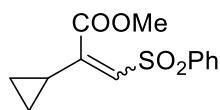

**3na**, a mixture of *E* and *Z* = 15:1, colorless oil, yield 12%.

$^1\text{H NMR}$  (400 MHz, Chloroform-*d*)  $\delta$  7.96 – 7.92 (m, 0.41H), 7.91 – 7.86 (m, 2.17H), 7.62 – 7.57 (m, 1.17H), 7.53 – 7.48 (m, 2.57H), 6.83 (s, 0.95H), 3.83 (s, 0.21H), 3.63 (s, 3.00H), 2.69 (tt,  $J$  = 8.6, 5.2 Hz, 1.11H), 1.11 – 1.05 (m, 1.99H), 0.91 (dt,  $J$  = 8.6, 3.2 Hz, 2.10H).

$^{13}\text{C NMR}$  (176 MHz,  $\text{CDCl}_3$ )  $\delta$  164.6, 152.2, 148.3, 141.1, 134.7, 133.8, 133.5, 133.2, 129.4, 129.2, 129.0, 128.2, 127.5, 127.1, 52.5, 25.8, 10.9, 10.7, 9.5, 9.3.

**HRMS (ESI-TOF)**  $m/z$ :  $[\text{M} + \text{H}]^+$  Calcd for  $\text{C}_{13}\text{H}_{14}\text{O}_4\text{S}$  267.0686; Found: 267.0691.

### methyl (*E*)-3-(phenylsulfonyl)acrylate

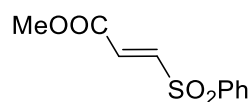

**3oa**, the product was obtained from ethynyltrimethylsilane, colorless oil, yield 13%.

$^1\text{H NMR}$  (400 MHz, Chloroform-*d*)  $\delta$  7.93 – 7.80 (m, 2H), 7.68 – 7.57 (m, 1H), 7.58 – 7.49 (m, 2H), 7.28 (d,  $J$  = 15.2 Hz, 1H), 6.78 (d,  $J$  = 15.1 Hz, 1H), 3.74 (s, 3H).

$^{13}\text{C NMR}$  (176 MHz,  $\text{CDCl}_3$ )  $\delta$  163.9, 143.5, 138.4, 134.4, 130.5, 129.7, 128.4, 52.8.

**HRMS (ESI-TOF)**  $m/z$ :  $[\text{M} + \text{H}]^+$  Calcd for  $\text{C}_{10}\text{H}_{10}\text{O}_4\text{S}$  227.0373; Found: 223.0375.

### methyl 6-methoxy-2-((phenylsulfonyl)methylene)hexanoate

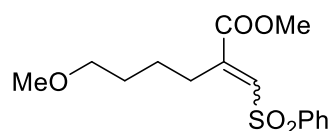

**3pa**, the product was obtained from 6-iodohex-1-yne, A mixture of *E* and *Z* > 20:1, colorless oil, yield 27%.

$^1\text{H NMR}$  (400 MHz, Chloroform-*d*)  $\delta$  7.90 – 7.85 (m, 2H), 7.64 – 7.57 (m, 1H), 7.55 – 7.47 (m, 2H), 7.09 (s, 1H), 3.70 (s, 3H), 3.33 (t,  $J$  = 6.4 Hz, 2H), 3.26 (s, 3H), 2.87 – 2.76 (m, 2H), 1.59 (ddt,  $J$  = 7.2, 5.9, 1.6 Hz, 2H), 1.49 – 1.43 (m, 2H).

$^{13}\text{C NMR}$  (101 MHz,  $\text{CDCl}_3$ )  $\delta$  165.9, 145.3, 140.6, 137.0, 134.0, 129.5, 127.7, 72.2, 58.5, 53.0, 29.5, 26.9, 25.8.

**HRMS (ESI-TOF)**  $m/z$ :  $[\text{M} + \text{H}]^+$  Calcd for  $\text{C}_{15}\text{H}_{20}\text{O}_5\text{S}$  313.1104; Found: 313.1113.

**methyl 3-oxo-2-(tosylmethylene)octanoate**

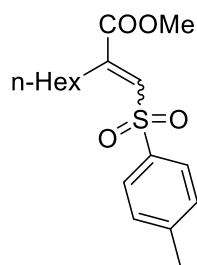

**3mb**, a mixture of *E* and *Z* = 10:1, colorless oil, yield 67%.

**<sup>1</sup>H NMR (400 MHz, Chloroform-*d*)** δ 7.84 – 7.64 (m, 2.53H), 7.29 (d, *J* = 8.1 Hz, 2.57H), 7.07 (s, 0.95H), 6.08 (s, 0.11H), 3.83 (s, 0.30H), 3.69 (s, 3.00H), 2.74 (dd, *J* = 8.8, 6.4 Hz, 2.02H), 2.38 (s, 3.97H), 1.39 – 1.10 (m, 10.89H), 0.89 – 0.73 (m, 4.20H).

**<sup>13</sup>C NMR (101 MHz, CDCl<sub>3</sub>)** δ 166.1, 145.3, 145.1, 137.8, 137.1, 130.1, 127.8, 52.9, 31.5, 29.4, 29.1, 27.3, 22.5, 21.7, 14.1.

**HRMS (ESI-TOF)** *m/z*: [M + H]<sup>+</sup> Calcd for C<sub>17</sub>H<sub>24</sub>O<sub>4</sub>S 325.1468; Found: 325.1477.

**methyl 2-(((4-fluorophenyl)sulfonyl)methylene)-3-oxooctanoate**

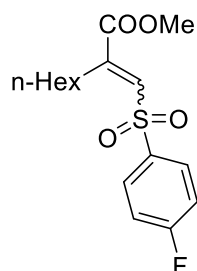

**3mc**, a mixture of *E* and *Z* = 5:1, colorless oil, yield 81%.

**<sup>1</sup>H NMR (400 MHz, Chloroform-*d*)** δ 7.94 – 7.84 (m, 2.37H), 7.27 – 7.11 (m, 2.60H), 7.05 (s, 0.95H), 6.08 (s, 0.18H), 3.84 (s, 0.56H), 3.71 (s, 3.00H), 2.80 – 2.70 (m, 2.02H), 2.32 – 2.26 (m, 0.38H), 1.42 – 1.10 (m, 10.50H), 0.92 – 0.71 (m, 3.93H).

**<sup>13</sup>C NMR (101 MHz, CDCl<sub>3</sub>)** δ 167.6, 166.0 (d, *J* = 258.34 Hz), 165.9, 149.7, 145.9, 136.8 (d, *J* = 3.03 Hz), 136.5, 130.9 (d, *J* = 9.75 Hz), 130.7 (d, *J* = 9.48 Hz), 127.4, 116.8 (d, *J* = 23.11 Hz), 116.6 (d, *J* = 22.54 Hz), 53.0, 52.8, 34.8, 31.4, 31.3, 29.4, 29.2, 28.4, 27.3, 26.5, 22.5, 22.4, 14.0, 13.9.

**HRMS (ESI-TOF)** *m/z*: [M + H]<sup>+</sup> Calcd for C<sub>16</sub>H<sub>21</sub>FO<sub>4</sub>S 329.1217; Found: 329.1222.

**methyl 2-(((4-chlorophenyl)sulfonyl)methylene)-3-oxooctanoate**

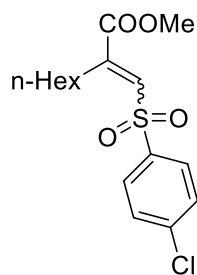

**3md**, a mixture of *E* and *Z* = 5:1, colorless oil, yield 58%.

**<sup>1</sup>H NMR (400 MHz, Chloroform-*d*)** δ 7.83 – 7.77 (m, 2.22H), 7.51 – 7.43 (m, 2.38H), 7.05 (s, 0.89H), 6.07 (s, 0.18H), 3.84 (s, 0.57H), 3.71 (s, 3.00H), 2.82 – 2.69 (m, 2.03H), 2.33 – 2.25 (m, 0.40H), 1.44 – 1.11 (m, 11.14H), 0.80 (dt, *J* = 17.0, 6.7 Hz, 4.16H).

**<sup>13</sup>C NMR (101 MHz, CDCl<sub>3</sub>)** δ 167.5, 165.9, 150.1, 146.3, 140.8, 139.2, 136.2, 129.8, 129.6, 129.4, 129.2, 127.2, 53.0, 52.8, 34.8, 31.4, 31.3, 29.4, 29.2, 28.4, 27.4, 26.5, 22.5, 22.4, 14.0, 13.9.

**HRMS (ESI-TOF)** *m/z*: [M + H]<sup>+</sup> Calcd for C<sub>16</sub>H<sub>21</sub>ClO<sub>4</sub>S 345.0922; Found: 345.0926.

**methyl 3-((4-chlorophenyl)sulfonyl)-2-phenylacrylate**

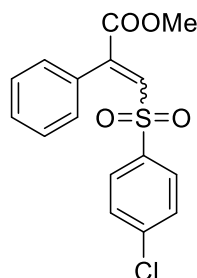

**3ad**, a mixture of *E* and *Z* = 20:3, yellow oil, yield 16%.

**<sup>1</sup>H NMR (400 MHz, Chloroform-*d*)** δ 7.91 – 7.86 (m, 0.34H), 7.51 (s, 0.99H), 7.50 – 7.45 (m, 0.38H), 7.41 – 7.35 (m, 2.28H), 7.35 – 7.29 (m, 1.61H), 7.27 – 7.21 (m, 3.96H), 7.05 – 7.01 (m, 1.88H), 6.53 (s, 0.15H), 3.95 (s, 0.44), 3.71 (s, 3.00H).

**<sup>13</sup>C NMR (101 MHz, CDCl<sub>3</sub>)** δ 165.3, 143.4, 140.5, 140.3, 138.1, 130.7, 129.7, 129.5, 129.5, 129.4, 129.4, 129.3, 129.2, 127.9, 127.0, 53.5.

**HRMS (ESI-TOF)** *m/z*: [M + H]<sup>+</sup> Calcd for C<sub>16</sub>H<sub>13</sub>ClO<sub>4</sub>S 337.0296; Found: 337.0298.

**methyl 3-(ethylsulfonyl)-2-phenylacrylate**

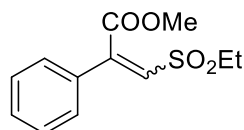

**3ae**, a mixture of *E* and *Z* = 4:1, yellow oil, yield 45%.

**<sup>1</sup>H NMR (400 MHz, Chloroform-*d*)** δ 7.42 – 7.31 (m, 7.31H), 6.57 (s, 0.26H), 3.86 (s, 0.77H), 3.76 (s, 3.00H), 3.12 (q, *J* = 7.5 Hz, 0.58H), 2.66 (q, *J* = 7.4 Hz, 2.12H), 1.35 (t, *J* = 7.5 Hz, 0.96H), 1.17 (t, *J* = 7.4 Hz, 3.28H).

**<sup>13</sup>C NMR (101 MHz, CDCl<sub>3</sub>)** δ 165.4, 143.8, 137.2, 131.4, 131.0, 129.8, 129.4, 129.3, 128.1, 127.0, 124.7, 53.5, 53.1, 50.2, 49.0, 6.8, 6.7.

**HRMS (ESI-TOF)** m/z: [M + H]<sup>+</sup> Calcd for C<sub>12</sub>H<sub>14</sub>O<sub>4</sub>S 255.0686; Found: 255.0691.

**methyl 3-(methylsulfonyl)-2-phenylacrylate**

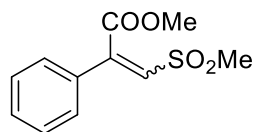

**3af**, a mixture of *E* and *Z* = 5:1, yellow oil, yield 67%.

**<sup>1</sup>H NMR (400 MHz, Chloroform-*d*)** δ 7.46 – 7.30 (m, 7.17H), 6.66 (s, 0.21), 3.87 (s, 0.61H), 3.76 (s, 3.00H), 3.04 (s, 0.60H), 2.58 (s, 3.01H).

**<sup>13</sup>C NMR (101 MHz, CDCl<sub>3</sub>)** δ 166.1, 165.4, 148.5, 142.9, 139.3, 131.9, 131.5, 130.9, 130.0, 129.5, 129.3, 128.3, 127.1, 126.7, 53.5, 53.2, 43.9, 42.9.

**HRMS (ESI-TOF)** m/z: [M + H]<sup>+</sup> Calcd for C<sub>11</sub>H<sub>12</sub>O<sub>4</sub>S 241.0529; Found: 241.0533.

**methyl 2-([1,1'-biphenyl]-4-yl)-3-(methylsulfonyl)acrylate**

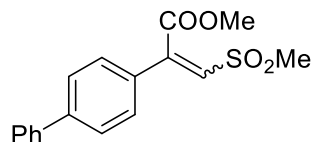

**3qf**, a mixture of *E* and *Z* = 15:4, yellow oil, yield 44%.

**<sup>1</sup>H NMR (700 MHz, Chloroform-*d*)** δ 7.62 – 7.57 (m, 3.11H), 7.56 – 7.51 (m, 3.57H), 7.46 – 7.40 (m, 4.06H), 7.38 (t, *J* = 7.8 Hz, 3.58H), 7.32 – 7.28 (m, 2.12H), 6.70 (s, 0.30), 3.89 (s, 0.80H), 3.79 (s, 3.00H), 3.06 (s, 0.77H), 2.65 (s, 3.06H).

**<sup>13</sup>C NMR (176 MHz, CDCl<sub>3</sub>)** δ 166.2, 165.5, 148.2, 144.4, 142.8, 142.7, 140.0, 139.1, 130.1, 129.9, 129.7, 129.1, 129.0, 128.9, 128.9, 128.8, 128.3, 128.0, 127.9, 127.7, 127.6, 127.4, 127.2, 127.1, 127.1, 126.9, 126.2, 53.6, 53.3, 43.9, 43.0.

**HRMS (ESI-TOF)** m/z: [M + H]<sup>+</sup> Calcd for C<sub>17</sub>H<sub>16</sub>O<sub>4</sub>S 317.0842; Found: 317.0850.

**methyl 3-(methylsulfonyl)-2-(4-(trifluoromethoxy)phenyl)acrylate**

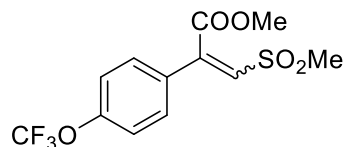

**3rf**, a mixture of *E* and *Z* > 20:1, colorless oil, yield 43%.

**<sup>1</sup>H NMR (400 MHz, Chloroform-*d*)** δ 7.37 (d, *J* = 8.8 Hz, 2H), 7.26 – 7.17 (m, 2H), 3.78 (s, 3H), 2.71 (s, 3H).

**<sup>13</sup>C NMR (101 MHz, CDCl<sub>3</sub>)** δ 165.0, 150.2, 141.8, 139.3, 131.3, 129.2, 120.3 (t, *J* = 137.69 Hz), 53.6, 43.1.

**<sup>19</sup>F NMR (376 MHz, CDCl<sub>3</sub>)** δ -57.7.

**HRMS (ESI-TOF)** m/z: [M + H]<sup>+</sup> Calcd for C<sub>12</sub>H<sub>11</sub>F<sub>3</sub>O<sub>5</sub>S 325.0352; Found: 325.0355.

**methyl 4-(3-methoxy-1-(methylsulfonyl)-3-oxoprop-1-en-2-yl)benzoate**

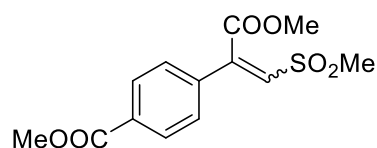

**3sf**, a mixture of *E* and *Z* > 20:1, colorless oil, yield 50%.

**<sup>1</sup>H NMR (700 MHz, Chloroform-*d*)** δ 8.03 (d, *J* = 8.3 Hz, 2H), 7.48 (s, 1H), 7.39 (d, *J* = 8.4 Hz, 2H), 3.86 (s, 3H), 3.77 (s, 3H), 2.70 (s, 3H).

**<sup>13</sup>C NMR (176 MHz, CDCl<sub>3</sub>)** δ 165.3, 163.8, 141.2, 138.5, 134.4, 130.3, 128.5, 128.3, 52.7, 51.3, 42.2.

**HRMS (ESI-TOF)** *m/z*: [M + H]<sup>+</sup> Calcd for C<sub>13</sub>H<sub>14</sub>O<sub>6</sub>S 299.0584; Found: 299.0589.

**methyl 2-(4-cyanophenyl)-3-(methylsulfonyl)acrylate**

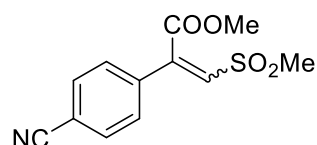

**3tf**, a mixture of *E* and *Z* > 20:1, yellow oil, yield 23%.

**<sup>1</sup>H NMR (400 MHz, Chloroform-*d*)** δ 7.68 – 7.63 (m, 2H), 7.51 (s, 1H), 7.41 (d, *J* = 8.5 Hz, 2H), 3.78 (s, 3H), 2.83 (s, 3H).

**<sup>13</sup>C NMR (101 MHz, CDCl<sub>3</sub>)** δ 164.4, 141.5, 139.5, 135.5, 131.7, 130.2, 118.2, 113.6, 53.8, 43.4.

**HRMS (ESI-TOF)** *m/z*: [M + H]<sup>+</sup> Calcd for C<sub>12</sub>H<sub>11</sub>NO<sub>4</sub>S 266.0482; Found: 266.0483.

**methyl 2-(2-fluorophenyl)-3-(methylsulfonyl)acrylate**

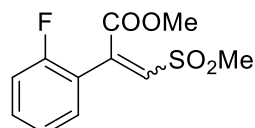

**3uf**, a mixture of *E* and *Z* = 5:1, yellow oil, yield 64%.

**<sup>1</sup>H NMR (400 MHz, Chloroform-*d*)** δ 7.52 (s, 1.02H), 7.37 (ddt, *J* = 12.9, 5.3, 2.6 Hz, 1.32H), 7.30 (qd, *J* = 7.5, 7.0, 1.8 Hz, 1.19H), 7.15 (td, *J* = 7.6, 1.1 Hz, 1.27H), 7.07 (tdd, *J* = 9.5, 8.0, 1.1 Hz, 1.38H), 6.83 (s, 0.23H), 3.85 (s, 0.64H), 3.76 (s, 3.00H), 3.10 (s, 0.64H), 2.78 (s, 3.08H).

**<sup>13</sup>C NMR (101 MHz, CDCl<sub>3</sub>)** δ 165.5, 164.5, 159.4 (d, *J* = 246.95 Hz), 143.0, 140.2, 138.2, 133.1 (d, *J* = 8.57 Hz), 131.9 (d, *J* = 8.57 Hz), 131.6 (d, *J* = 2.34 Hz), 129.9 (d, *J* = 2.61 Hz), 125.0 (d, *J* = 3.75 Hz), 124.0 (d, *J* = 3.75 Hz), 119.1 (d, *J* = 16.03 Hz), 116.7 (d, *J* = 21.58 Hz), 115.4 (d, *J* = 20.98 Hz), 53.7, 53.3, 43.9, 42.9.

**<sup>19</sup>F NMR (376 MHz, CDCl<sub>3</sub>)** δ -111.40, -112.28.

**HRMS (ESI-TOF)** *m/z*: [M + H]<sup>+</sup> Calcd for C<sub>11</sub>H<sub>11</sub>FO<sub>4</sub>S 259.0435; Found: 259.0441.

**methyl 2-(3-chlorophenyl)-3-(methylsulfonyl)acrylate**

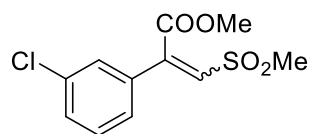

**3vf**, a mixture of *E* and *Z* = 10:1, yellow oil, yield 46%.

**<sup>1</sup>H NMR (700 MHz, Chloroform-*d*)** δ 7.45 (s, 0.90H), 7.36 (ddd, *J* = 8.1, 2.1, 1.1 Hz, 0.93H), 7.32 – 7.27 (m, 1.98H), 7.22 (dt, *J* = 7.7, 1.4 Hz, 0.92H), 6.66 (s, 0.10H), 3.88 (s, 0.28H), 3.78 (s, 3.00H), 3.05 (s, 0.23H) 2.72 (s, 3.00H).

**<sup>13</sup>C NMR (176 MHz, CDCl<sub>3</sub>)** δ 164.9, 141.6, 139.5, 134.2, 132.5, 130.0, 129.5, 129.3, 127.8, 53.7, 43.2.

**HRMS (ESI-TOF)** *m/z*: [M + H]<sup>+</sup> Calcd for C<sub>11</sub>H<sub>11</sub>ClO<sub>4</sub>S 275.0139; Found: 275.0138.

**methyl 3-(methylsulfonyl)-2-(naphthalen-2-yl)acrylate**

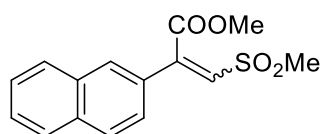

**3wf**, a mixture of *E* and *Z* = 5:1, yellow oil, yield 47%.

**<sup>1</sup>H NMR (700 MHz, Chloroform-*d*)** δ 7.89 – 7.86 (m, 0.97H), 7.84 – 7.77 (m, 3.80H), 7.52 – 7.44 (m, 3.63H), 7.37 (dd, *J* = 8.4, 1.8 Hz, 0.99H), 6.78 (s, 0.23H), 3.92 (s, 0.61H), 3.77 (s, 3.00H), 3.08 (s, 0.60H), 2.57 (s, 3.14H).

**<sup>13</sup>C NMR (176 MHz, CDCl<sub>3</sub>)** δ 165.2, 164.4, 147.5, 141.9, 139.4, 138.4, 133.4, 132.5, 131.9, 131.4, 128.7, 128.3, 128.0, 127.9, 127.6, 127.3, 127.2, 127.1, 127.0, 126.8, 126.8, 126.8, 126.8, 126.4, 126.2, 125.8, 125.6, 125.1, 121.8, 52.5, 52.3, 42.9, 41.9.

**HRMS (ESI-TOF)** *m/z*: [M + H]<sup>+</sup> Calcd for C<sub>15</sub>H<sub>14</sub>O<sub>4</sub>S 291.0686; Found: 291.0681.

**methyl (*E*)-3-(methylsulfonyl)acrylate**

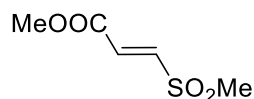

**3xf**, the product was obtained from ethynyltrimethylsilane, colorless oil, yield 46%.

**<sup>1</sup>H NMR (400 MHz, Chloroform-*d*)** δ 7.34 (d, *J* = 15.2 Hz, 1H), 6.82 (d, *J* = 15.2 Hz, 1H), 3.79 (s, 3H), 2.96 (s, 3H).

**<sup>13</sup>C NMR (101 MHz, CDCl<sub>3</sub>)** δ 163.7, 142.1, 132.5, 52.9, 42.4.

**HRMS (ESI-TOF)** *m/z*: [M + H]<sup>+</sup> Calcd for C<sub>5</sub>H<sub>8</sub>O<sub>4</sub>S 165.0216; Found: 165.0218.



**methyl 6-methoxy-2-((methylsulfonyl)methylene)hexanoate**

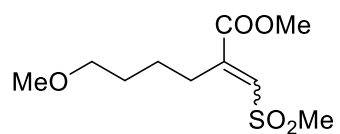

**3yf**, the product was obtained from 6-iodohex-1-yne. A mixture of *E* and *Z* > 20:1, colorless oil, yield 28%.

**<sup>1</sup>H NMR (400 MHz, Chloroform-*d*)**  $\delta$  7.11 (s, 1H), 3.77 (s, 3H), 3.33 (t, *J* = 6.2 Hz, 2H), 3.25 (s, 3H), 2.97 (s, 3H), 2.81 – 2.75 (m, 2H), 1.60 – 1.51 (m, 4H).

**<sup>13</sup>C NMR (101 MHz, CDCl<sub>3</sub>)**  $\delta$  165.8, 146.7, 135.7, 72.1, 58.5, 53.1, 43.8, 29.4, 27.0, 25.9.

**HRMS (ESI-TOF)** *m/z*: [M + H]<sup>+</sup> Calcd for C<sub>10</sub>H<sub>18</sub>O<sub>5</sub>S 251.0948; Found: 251.0953.

# 7 Copies of NMR spectra for compounds

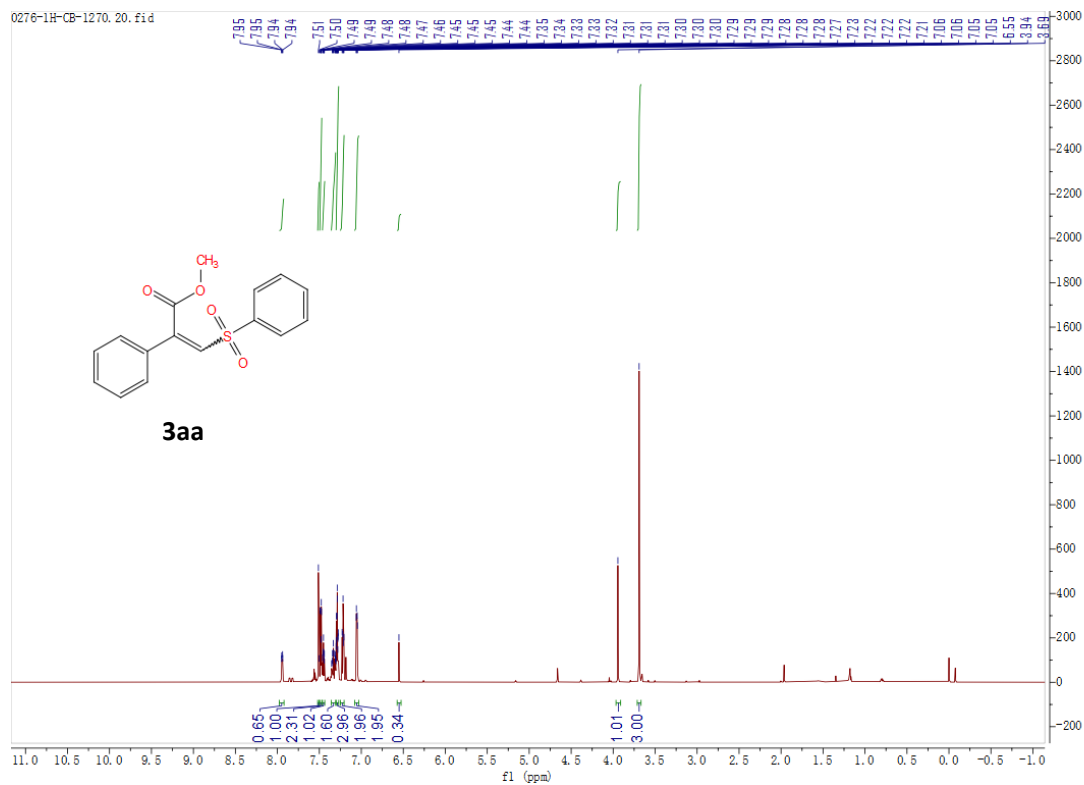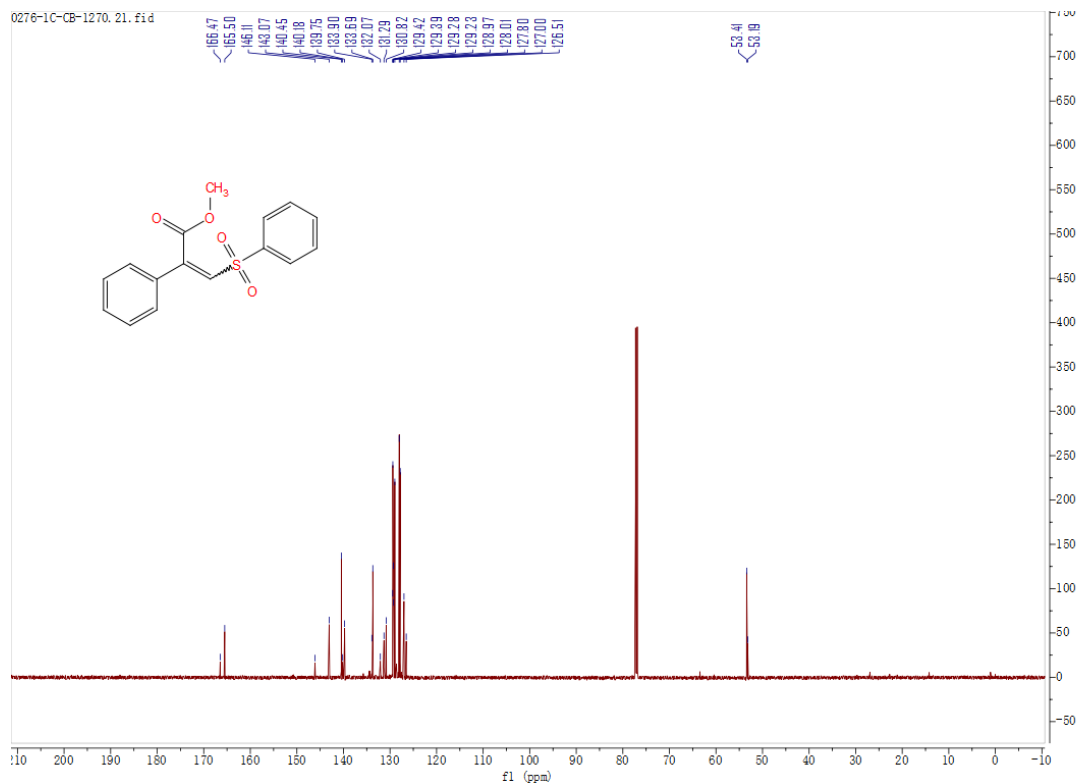

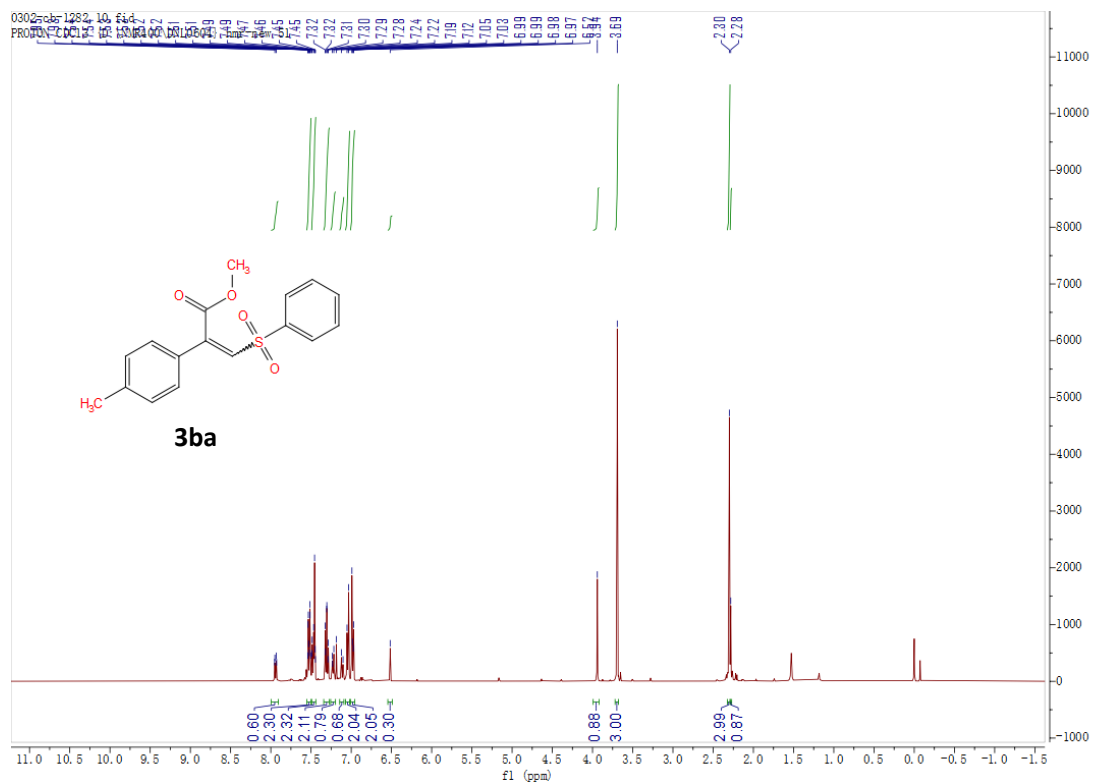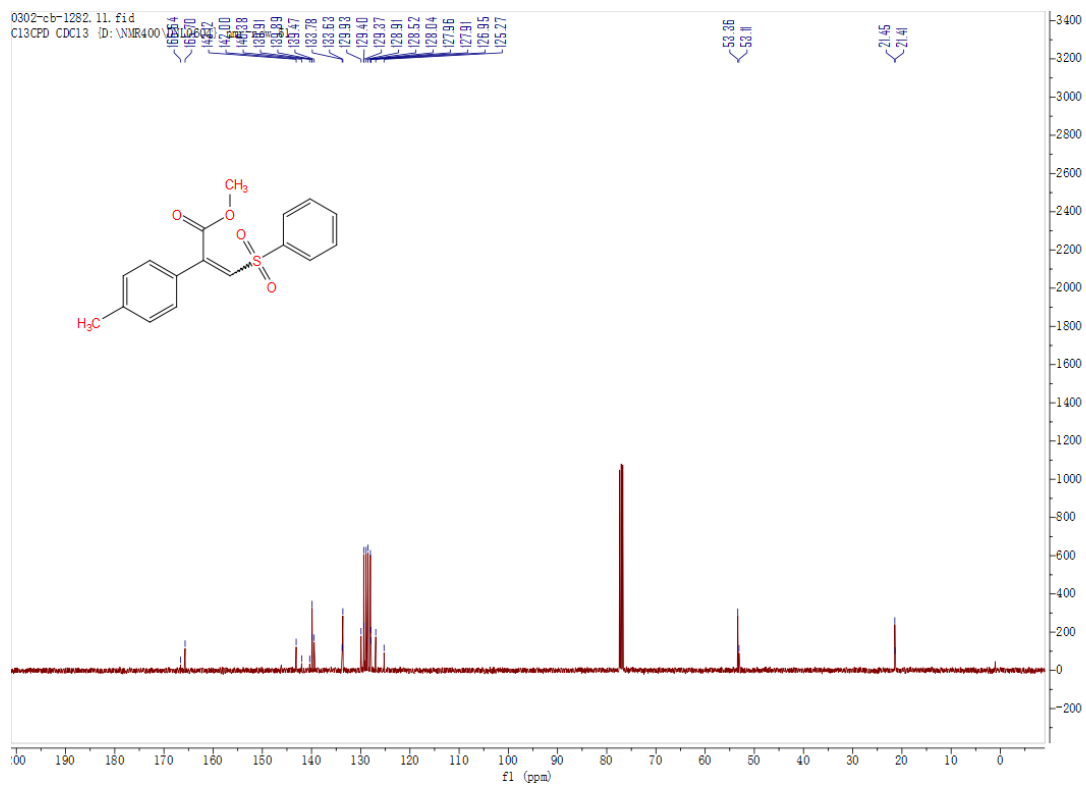

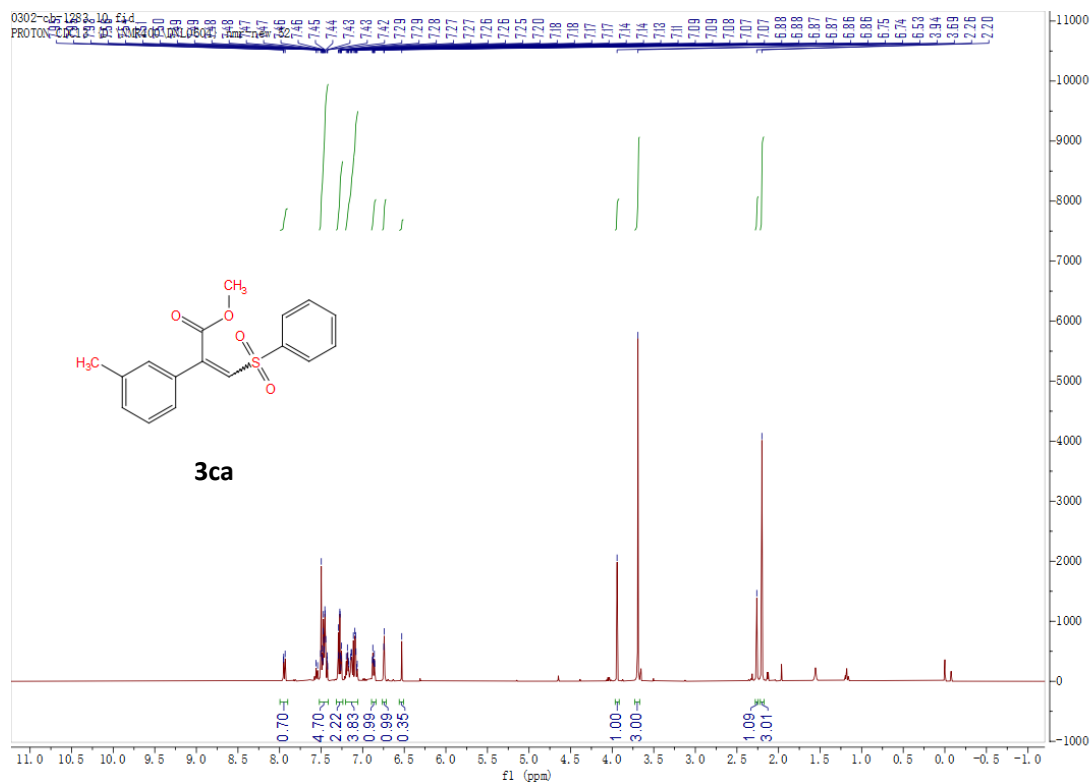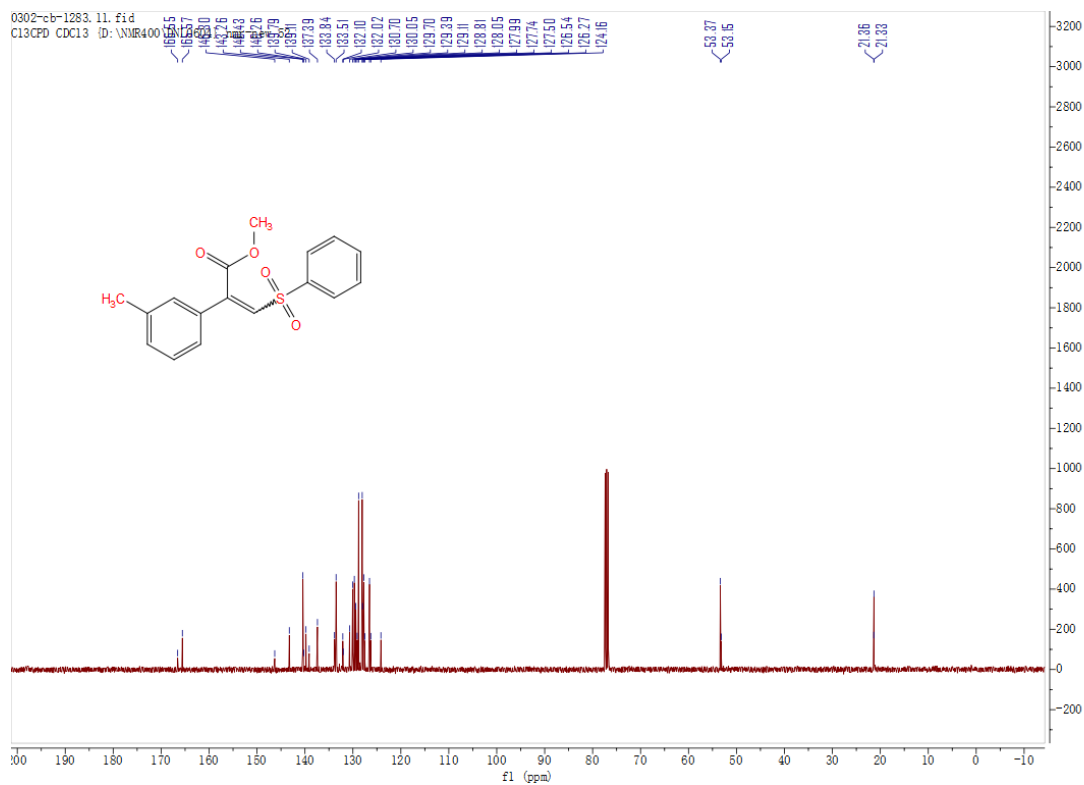

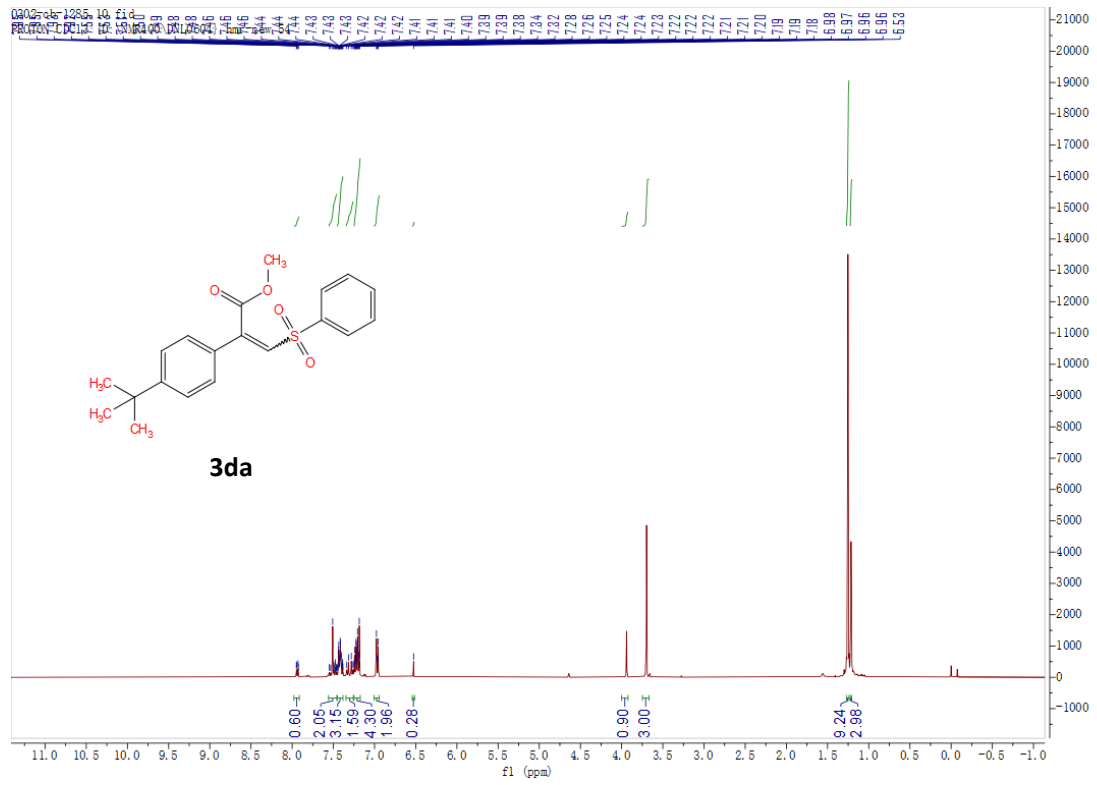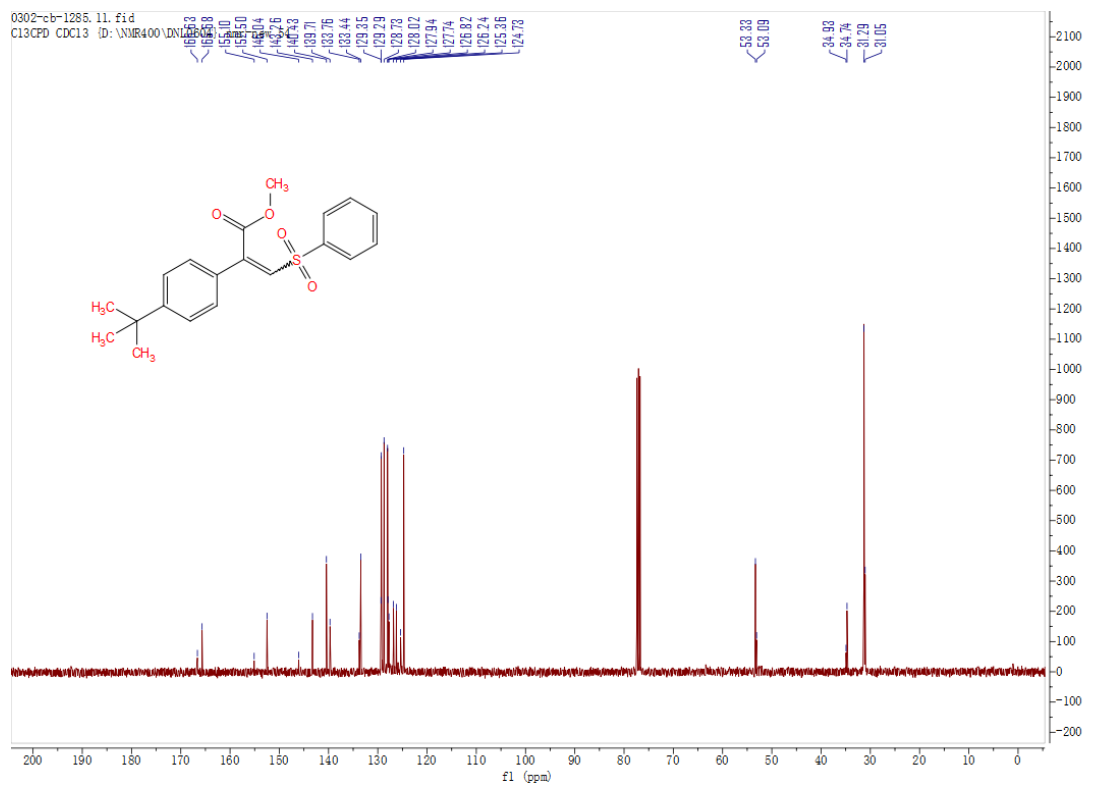

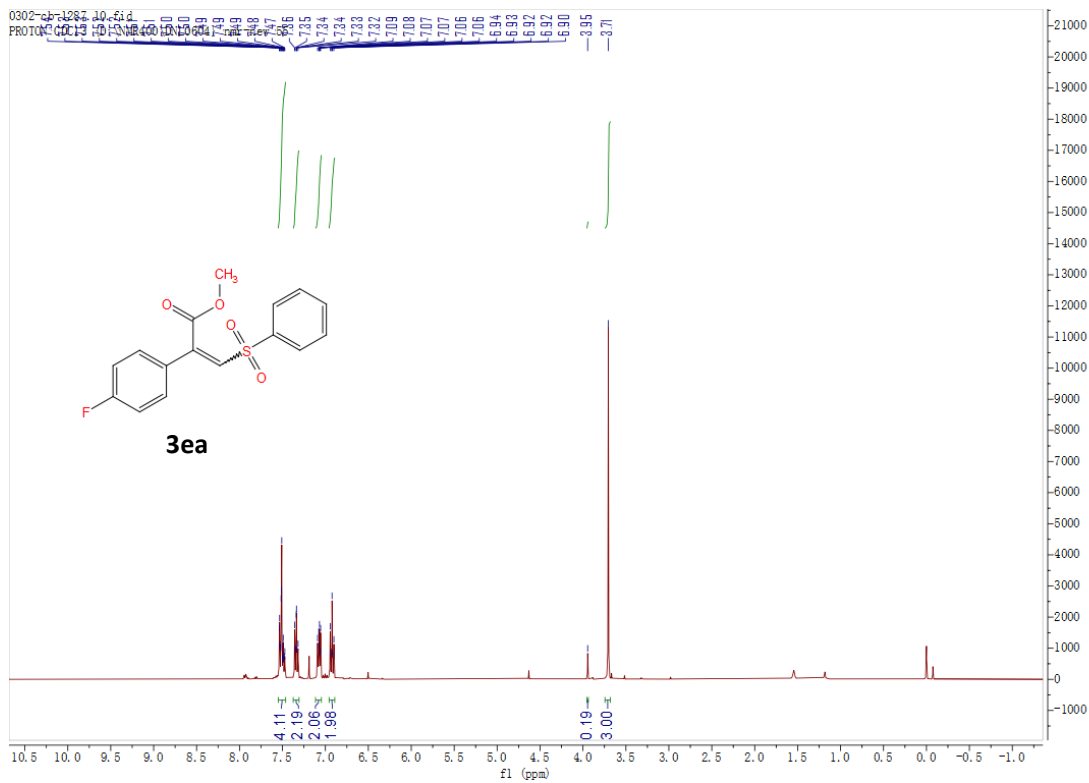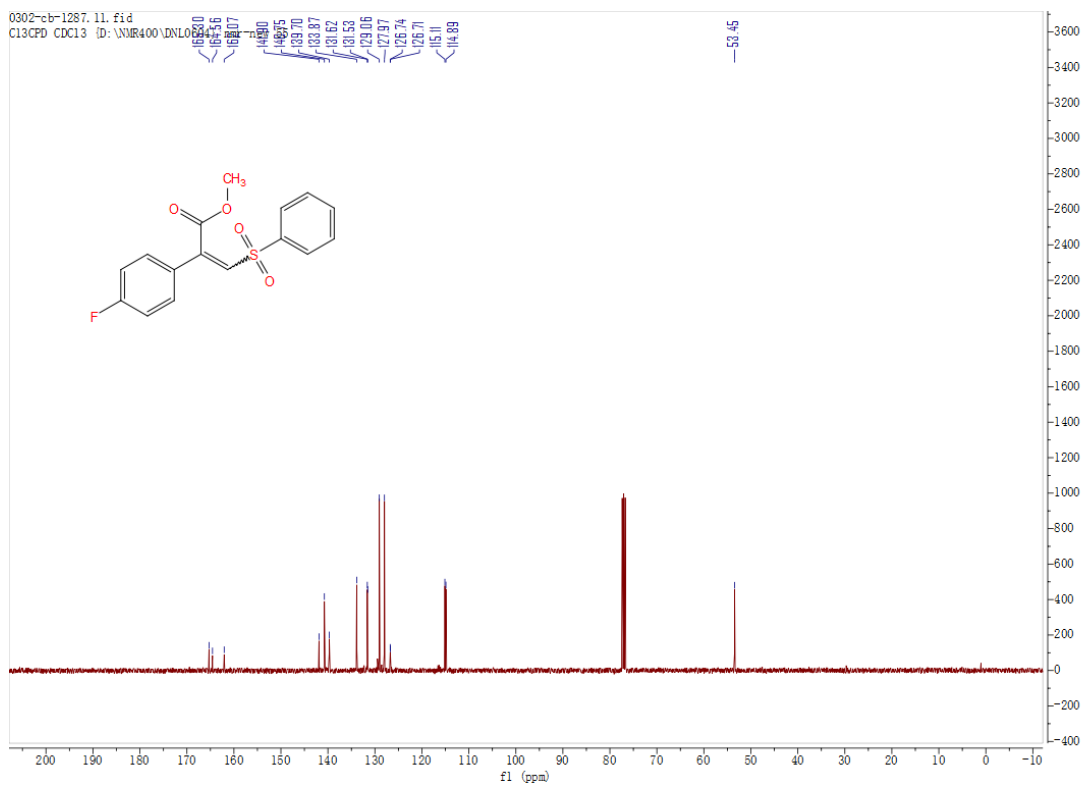

0302-cb-1287.12.fid  
F19 CDC13 [D:\NMR400\DNL0604] nmr-new 55

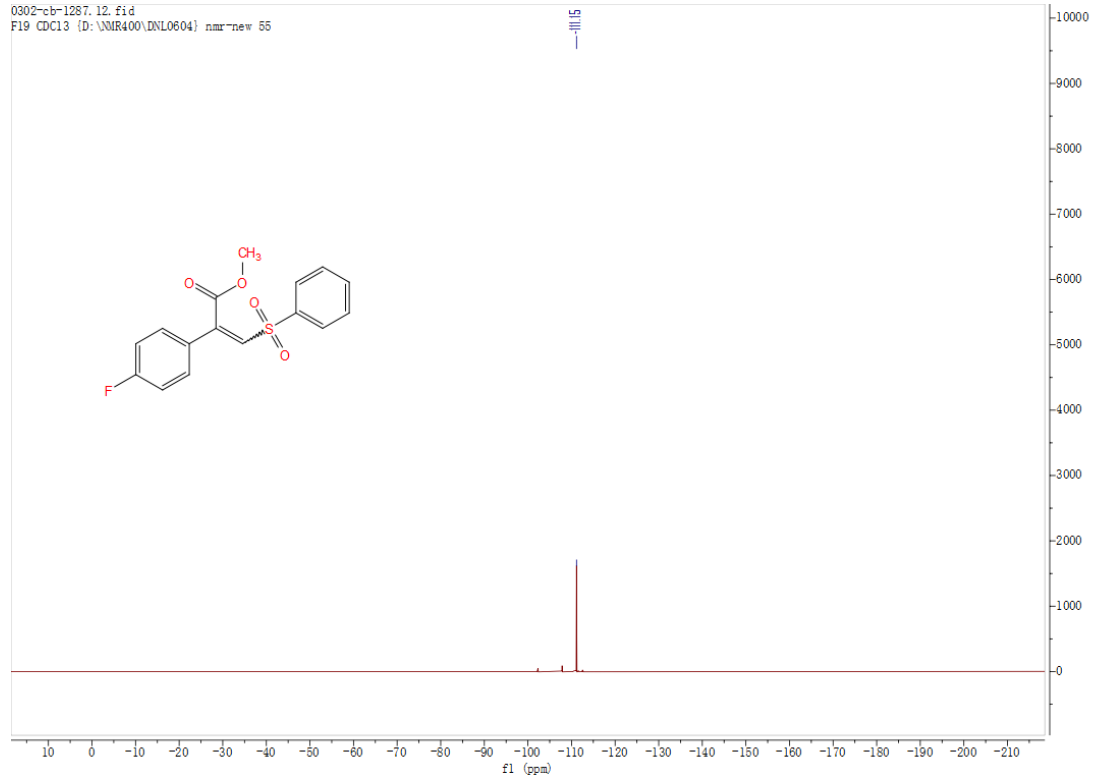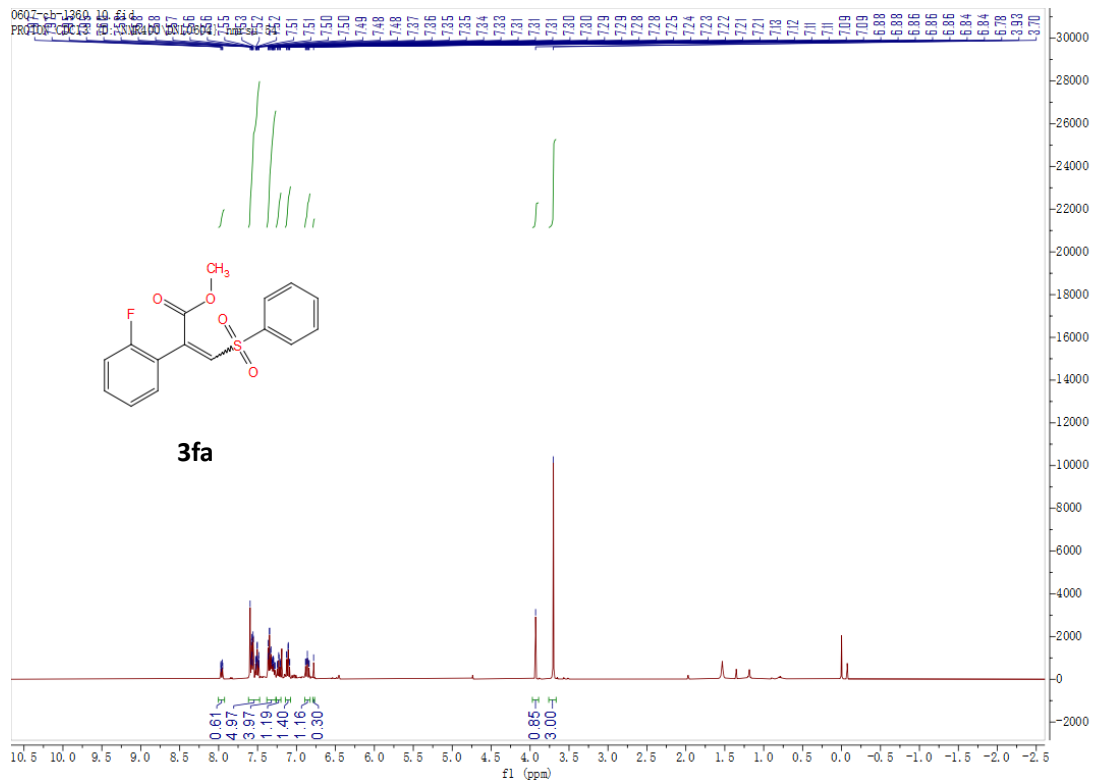

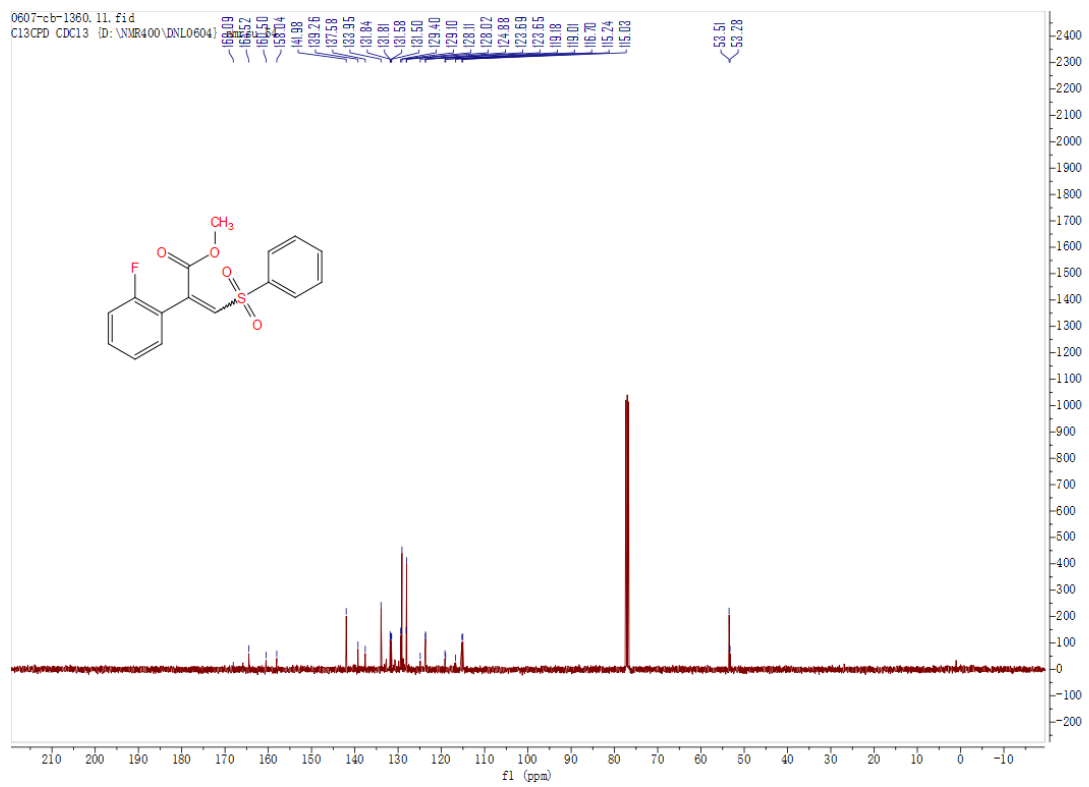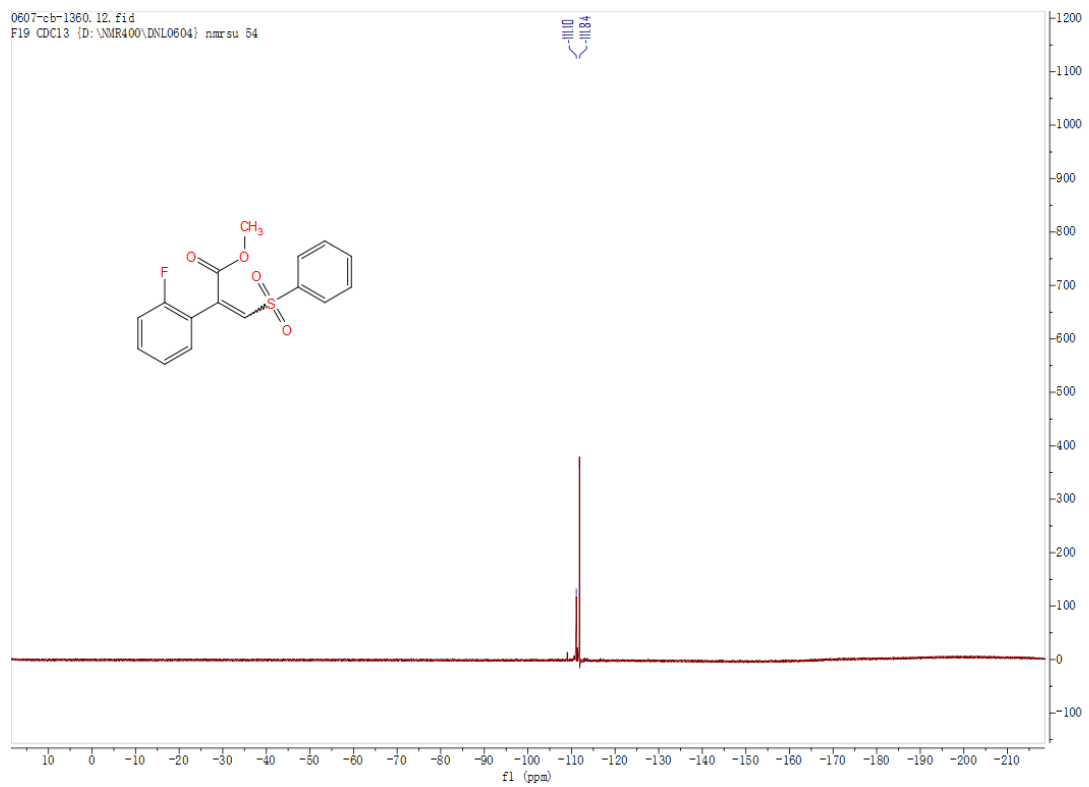



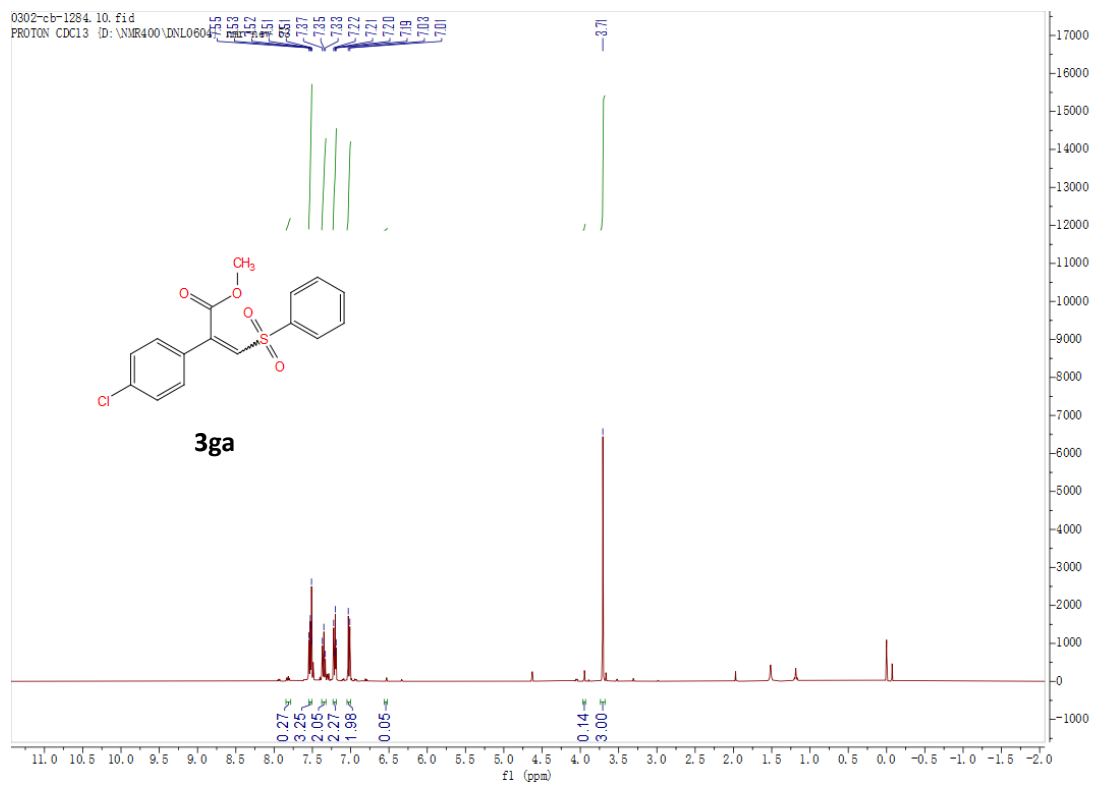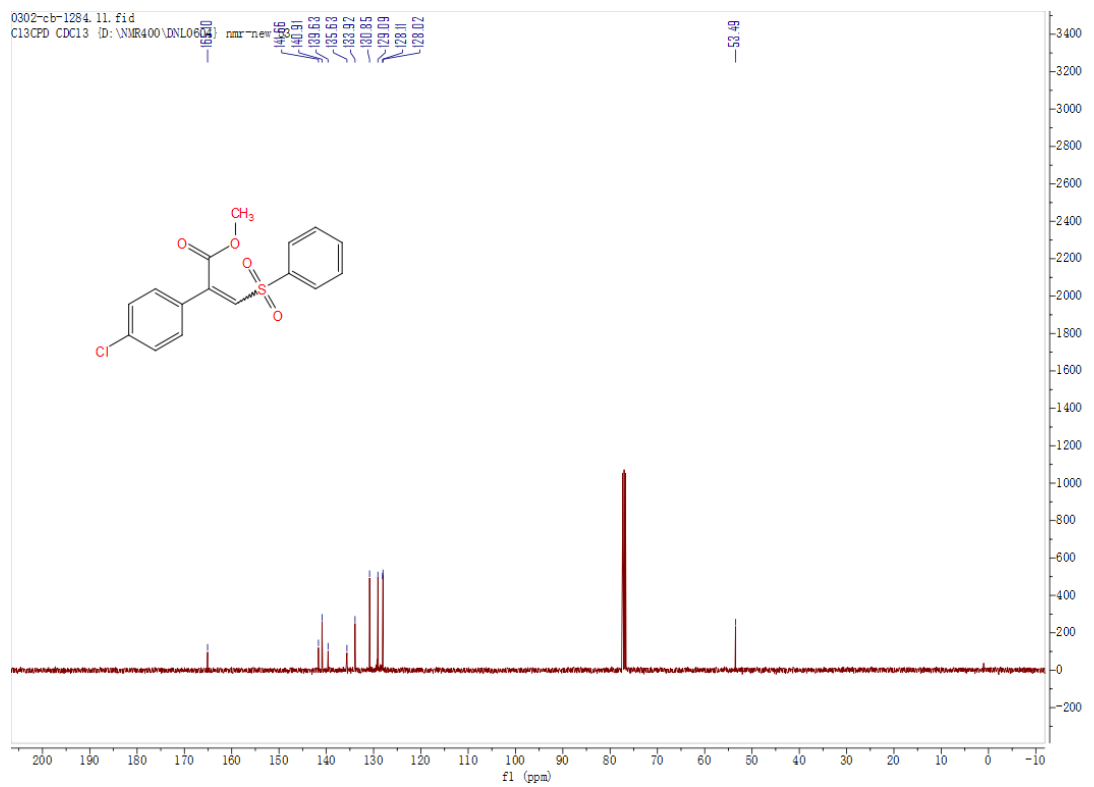

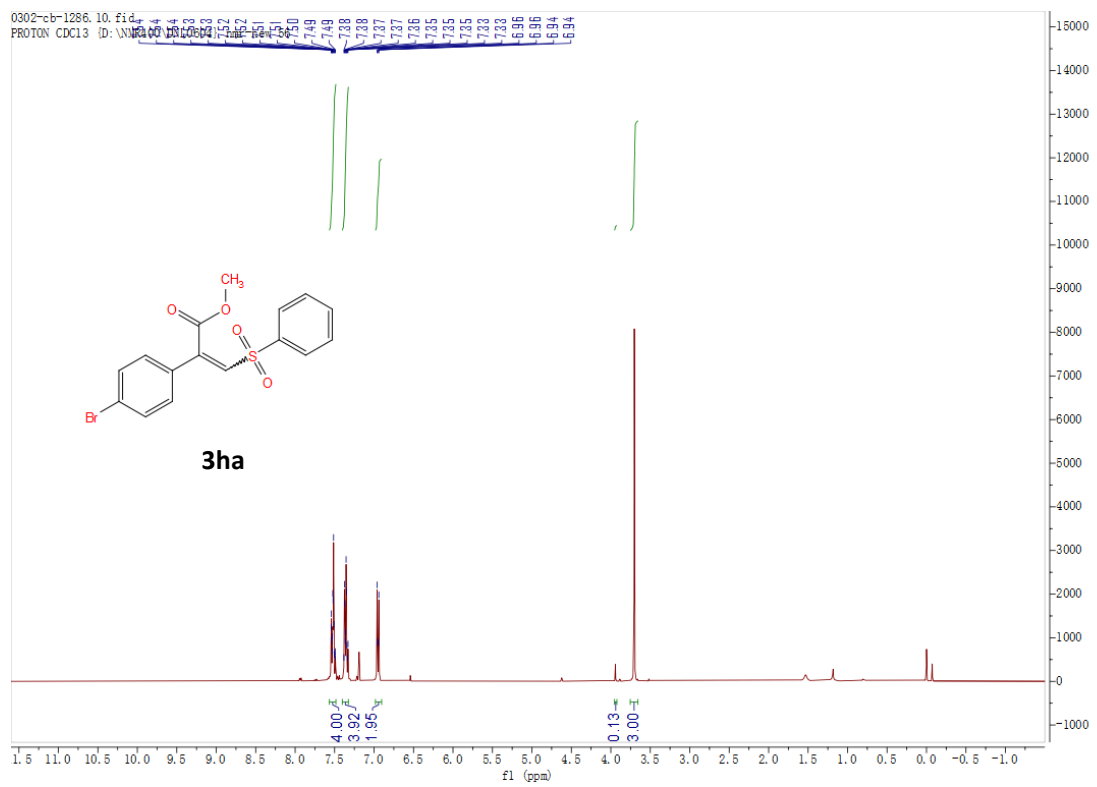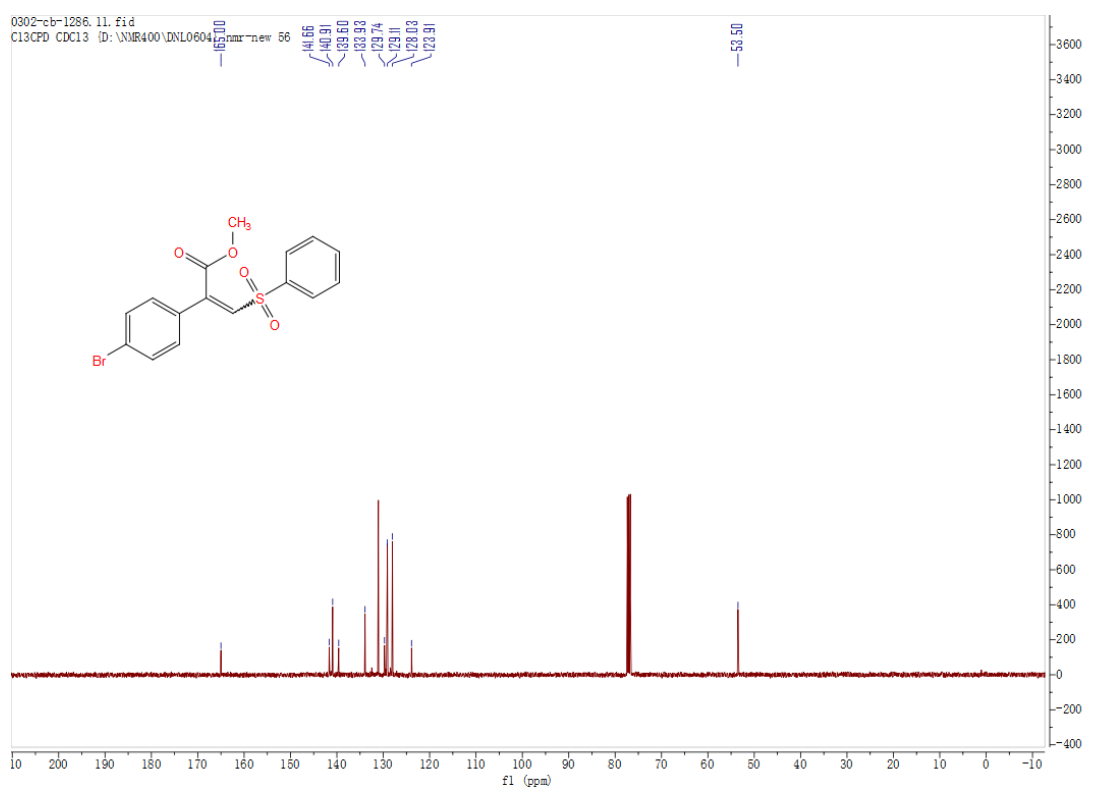



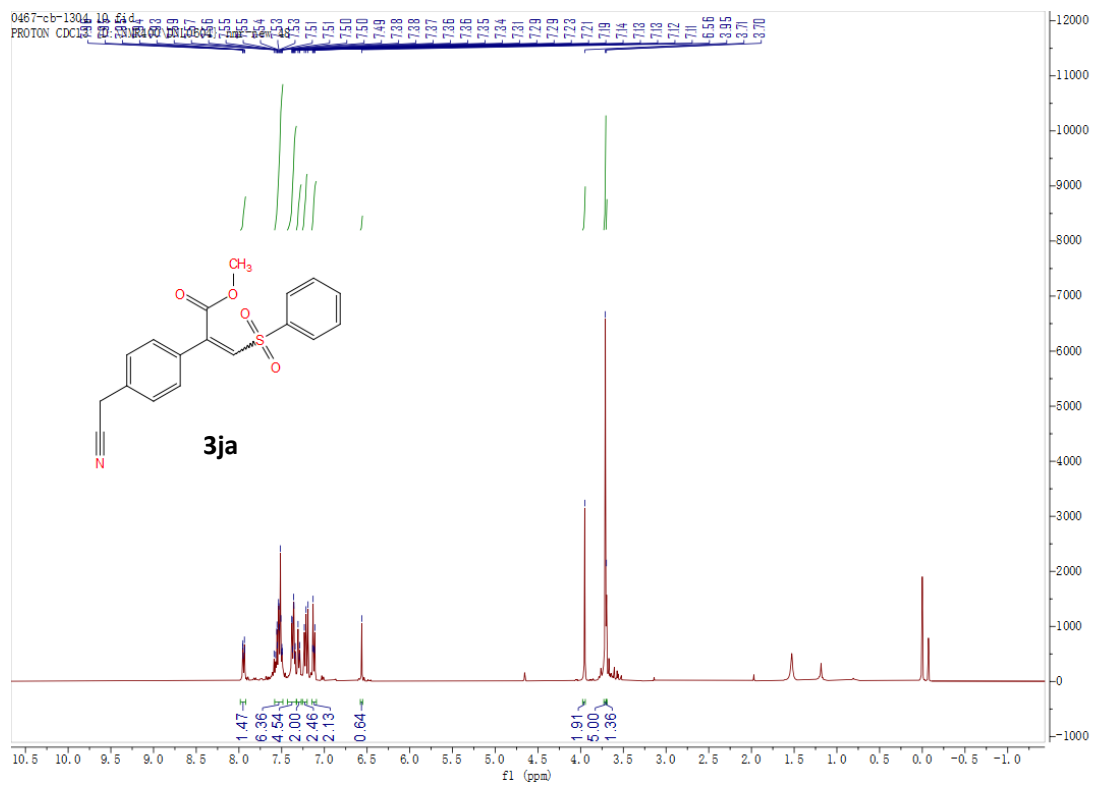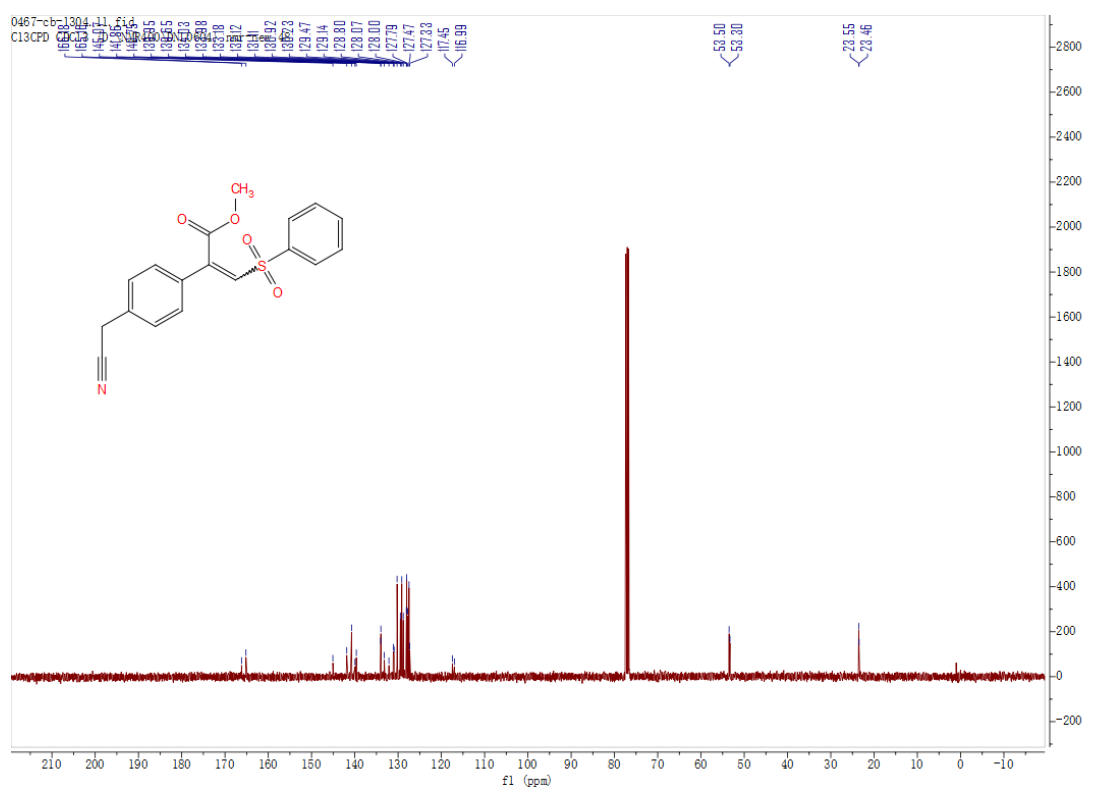

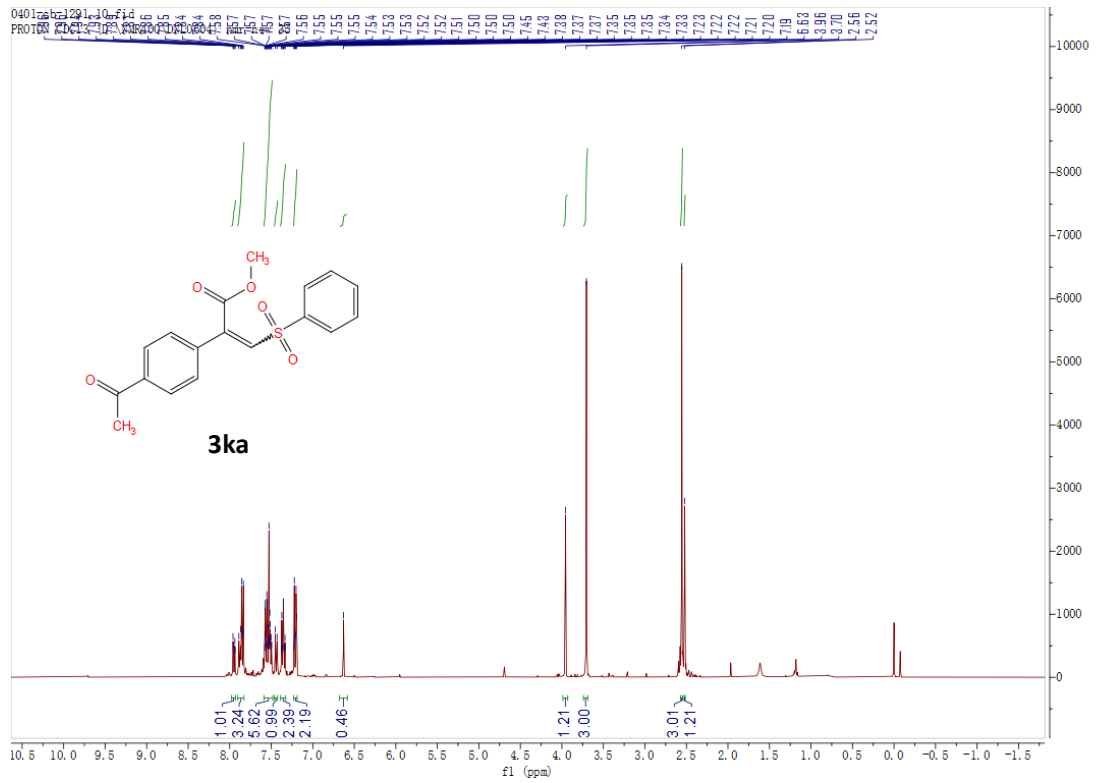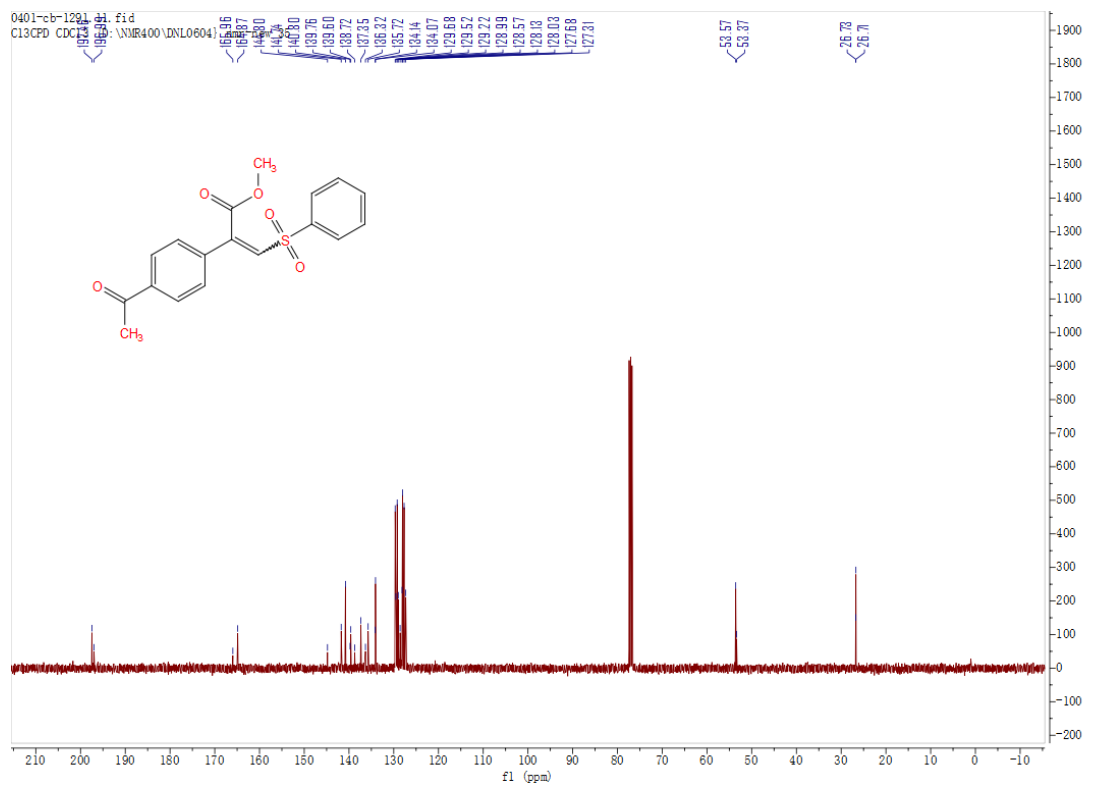

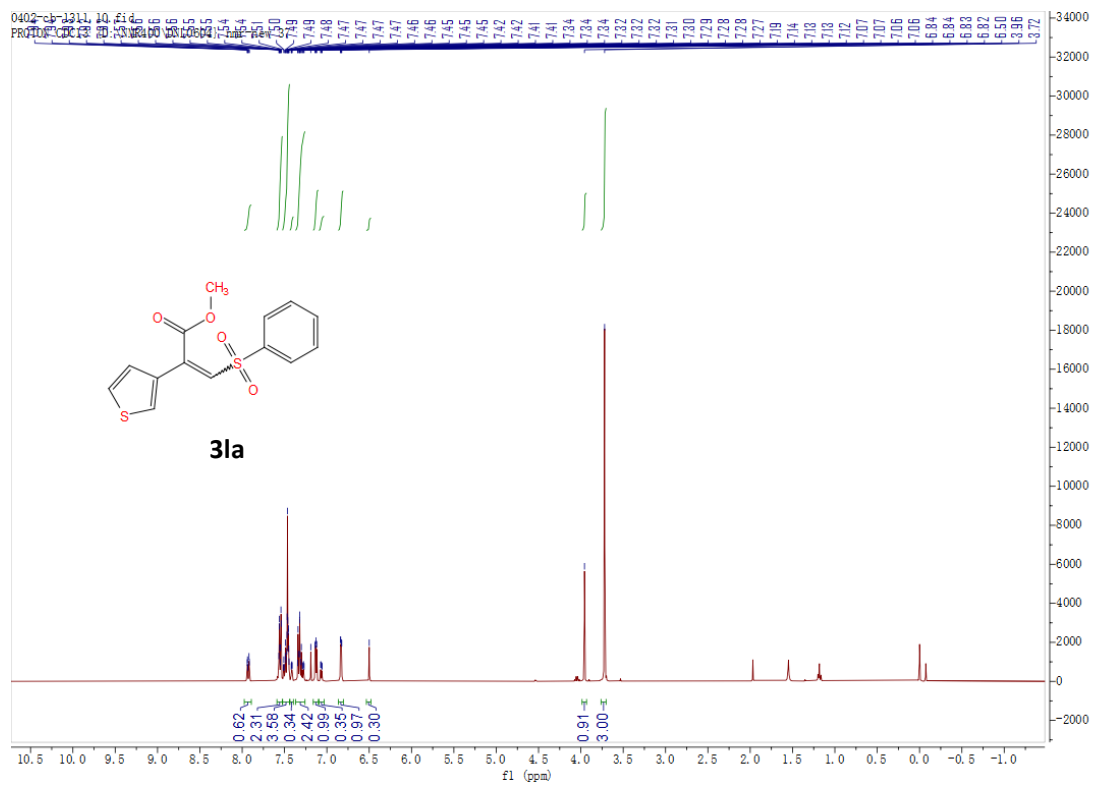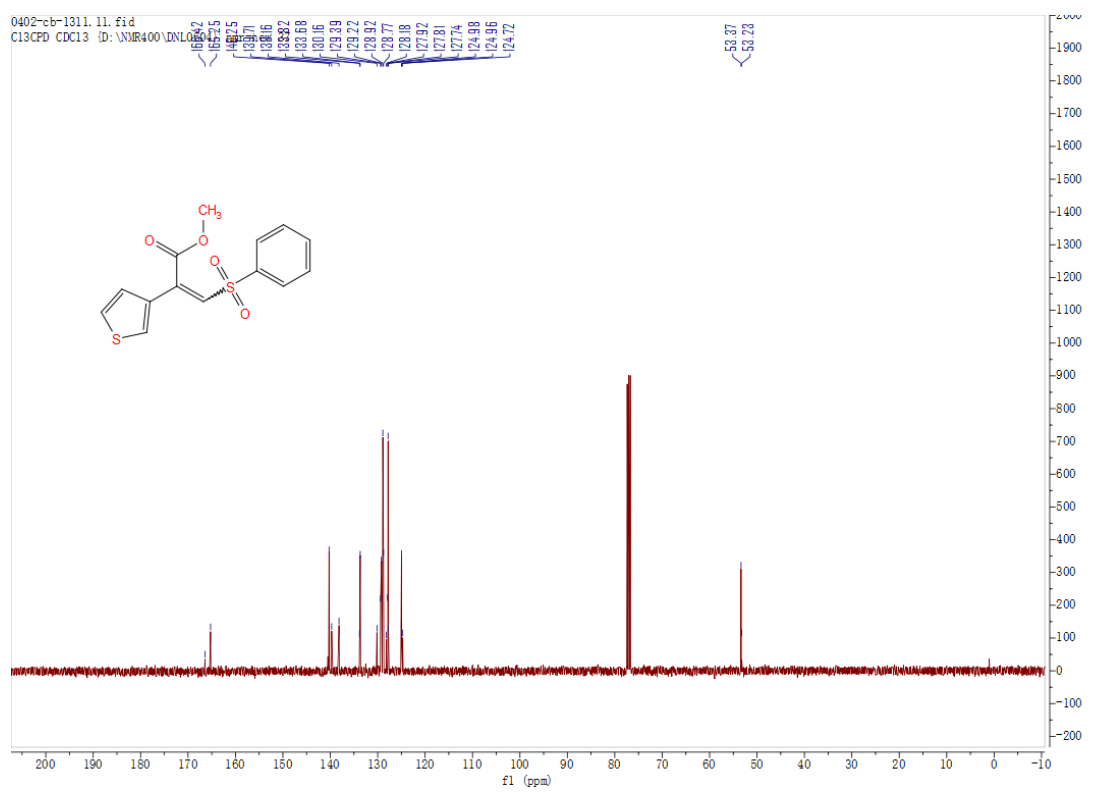

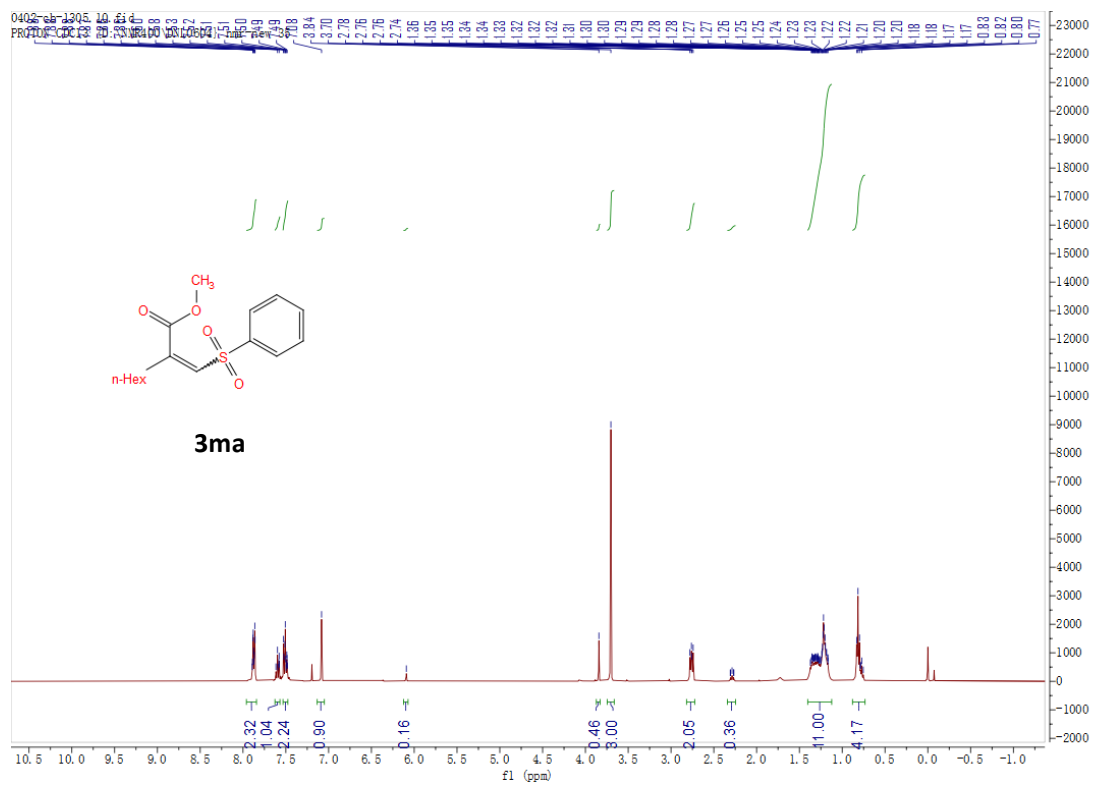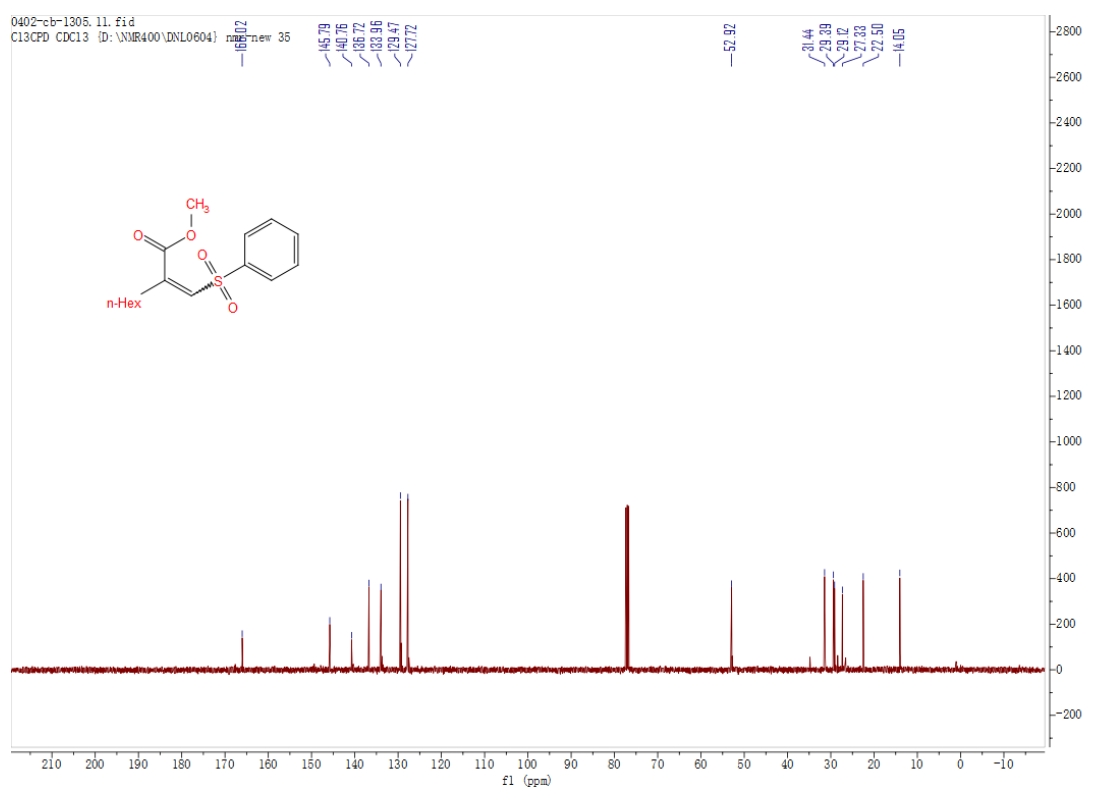

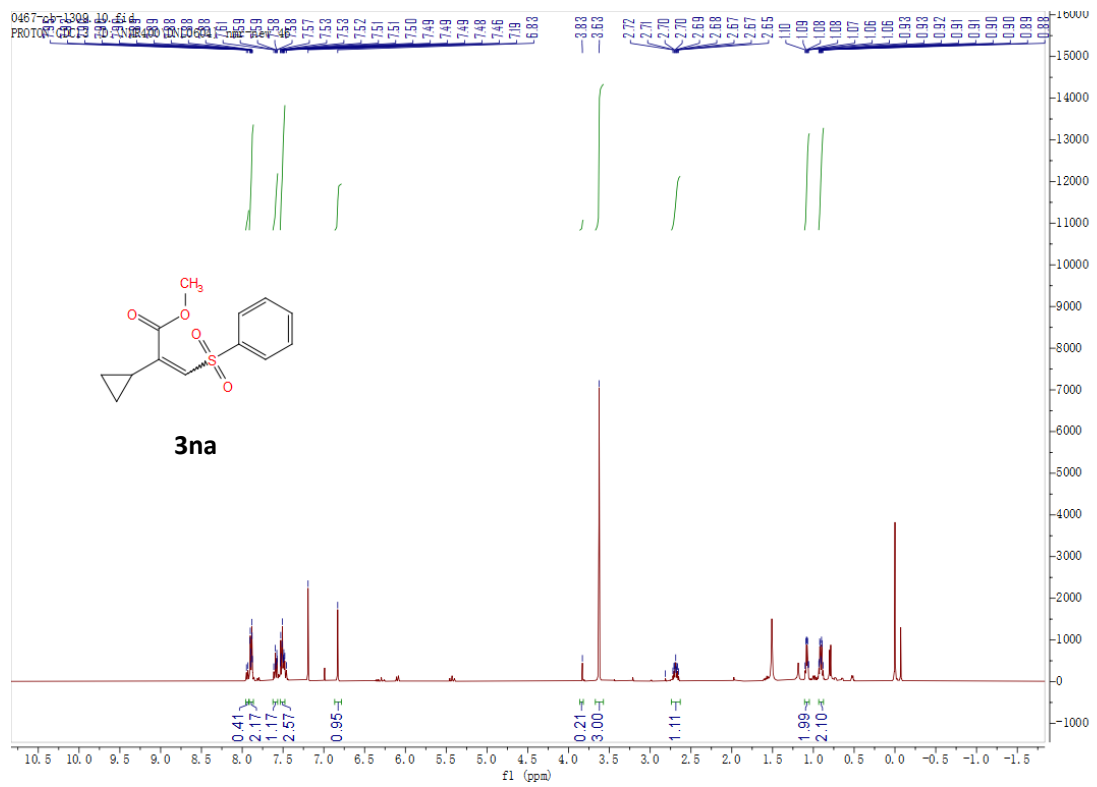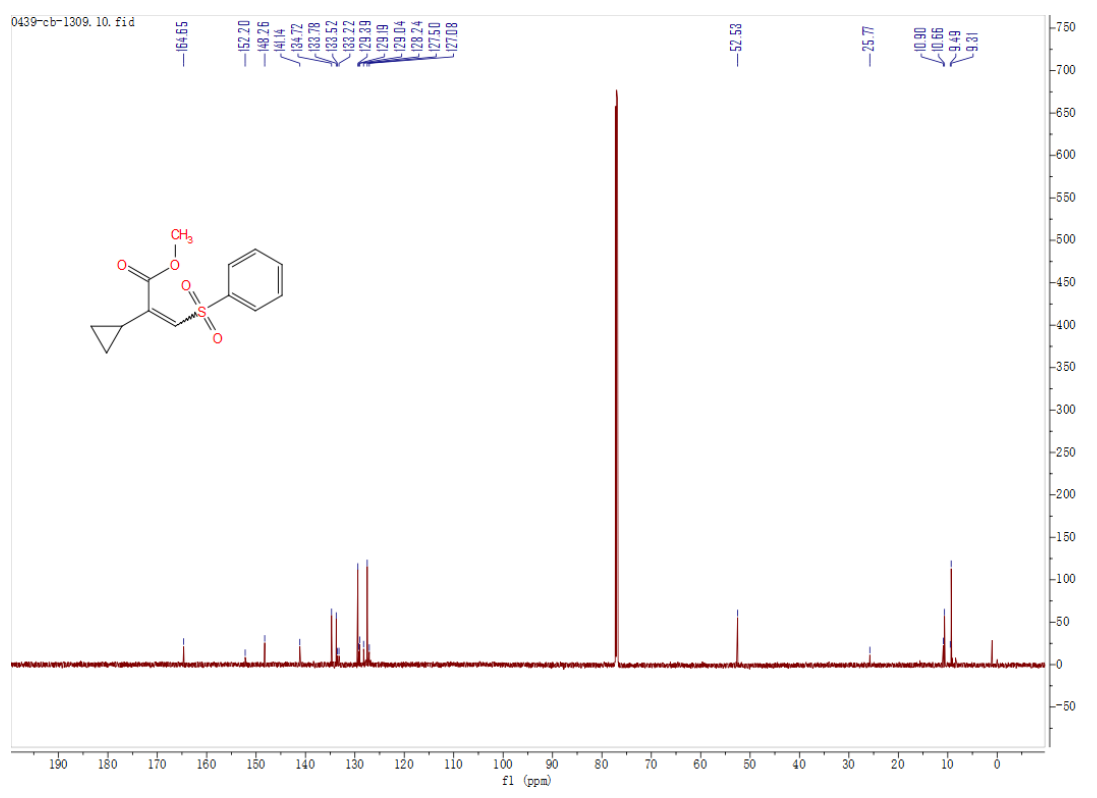



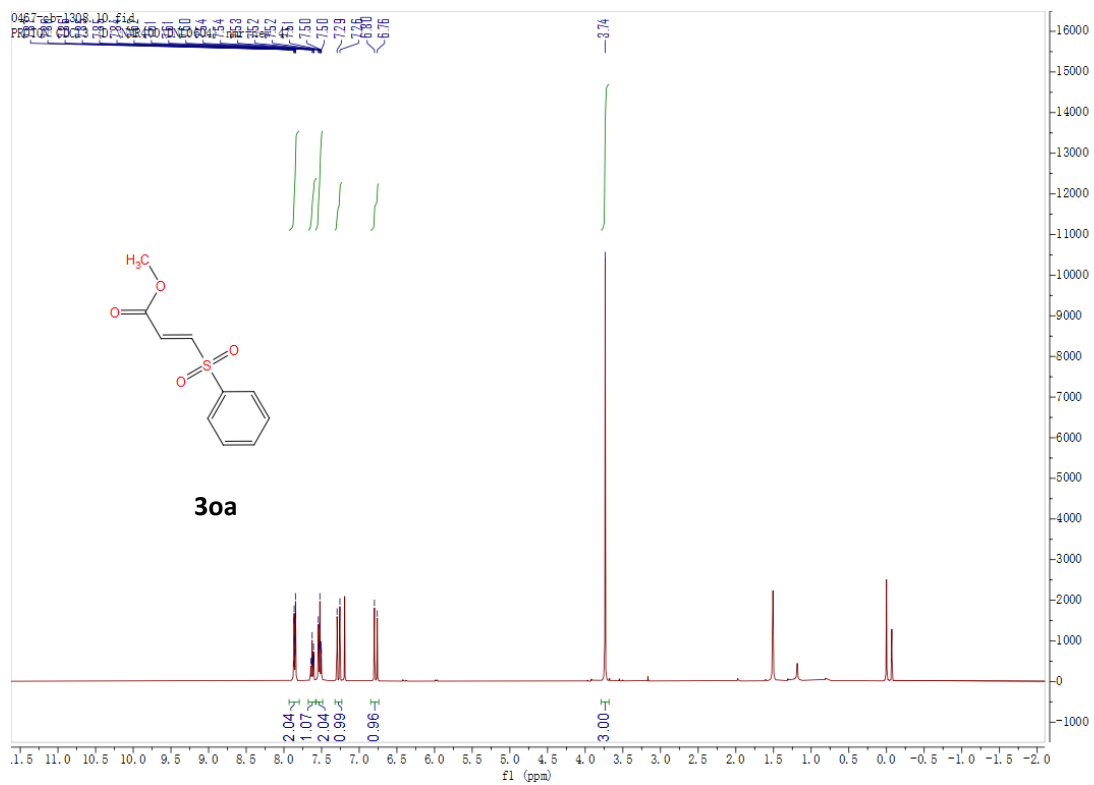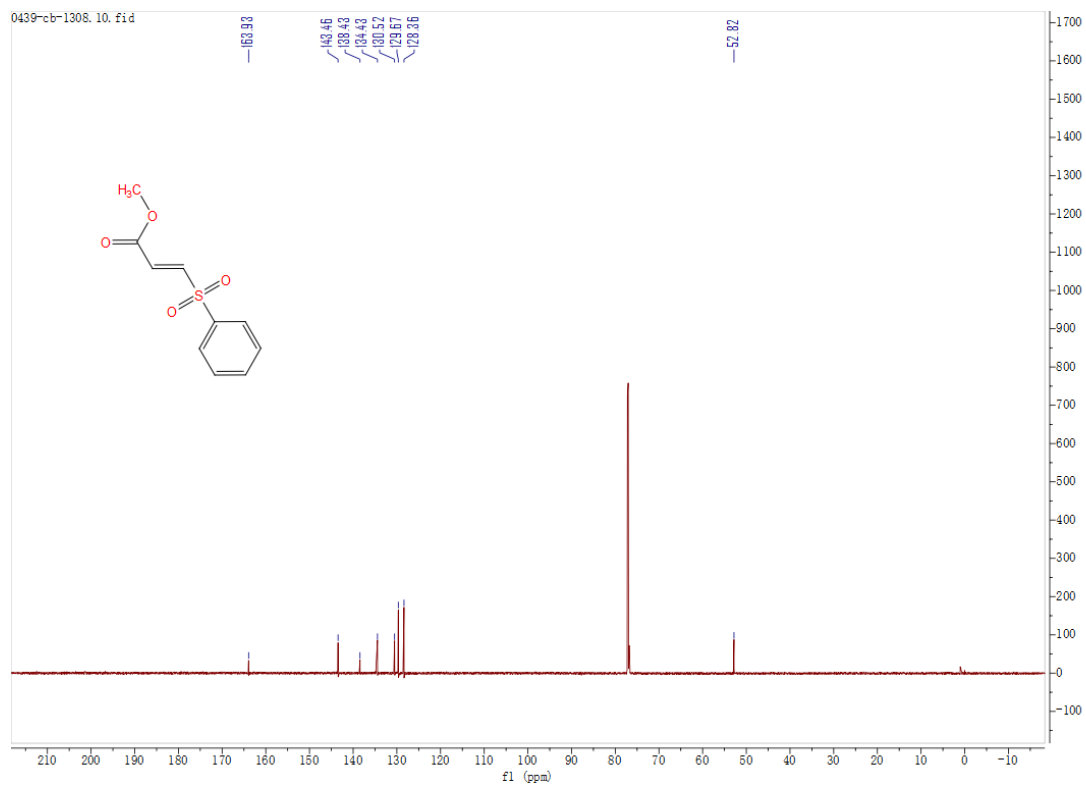

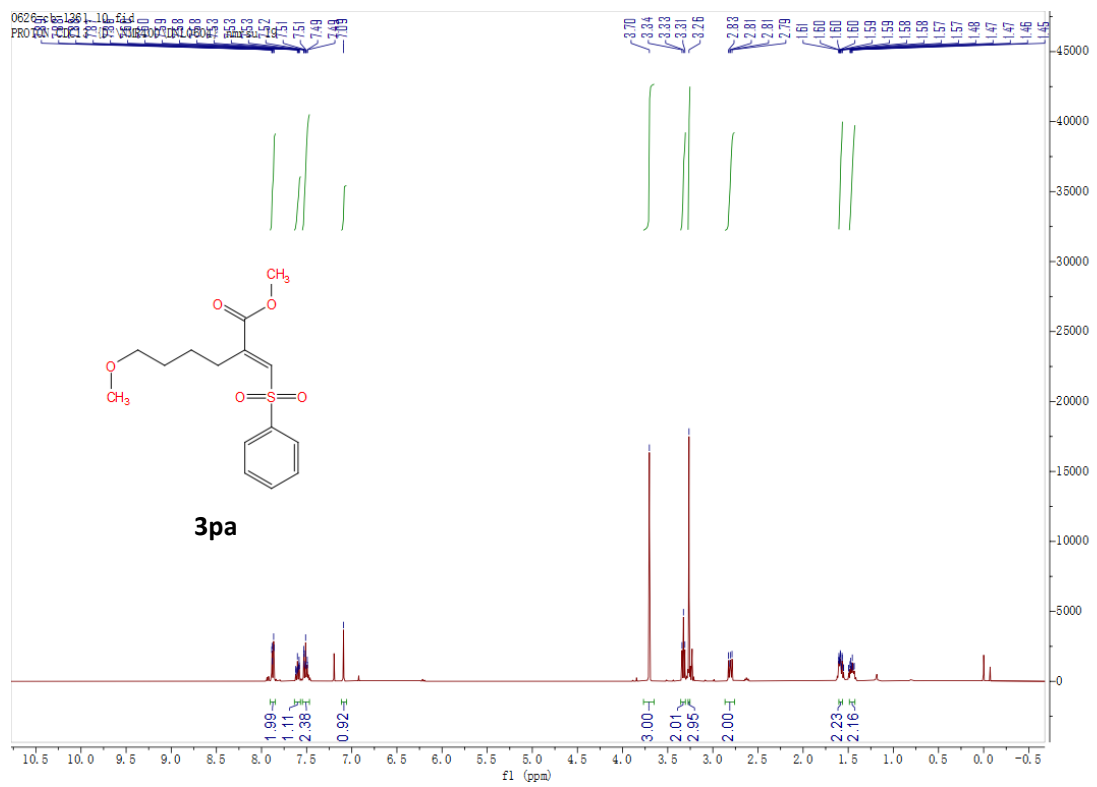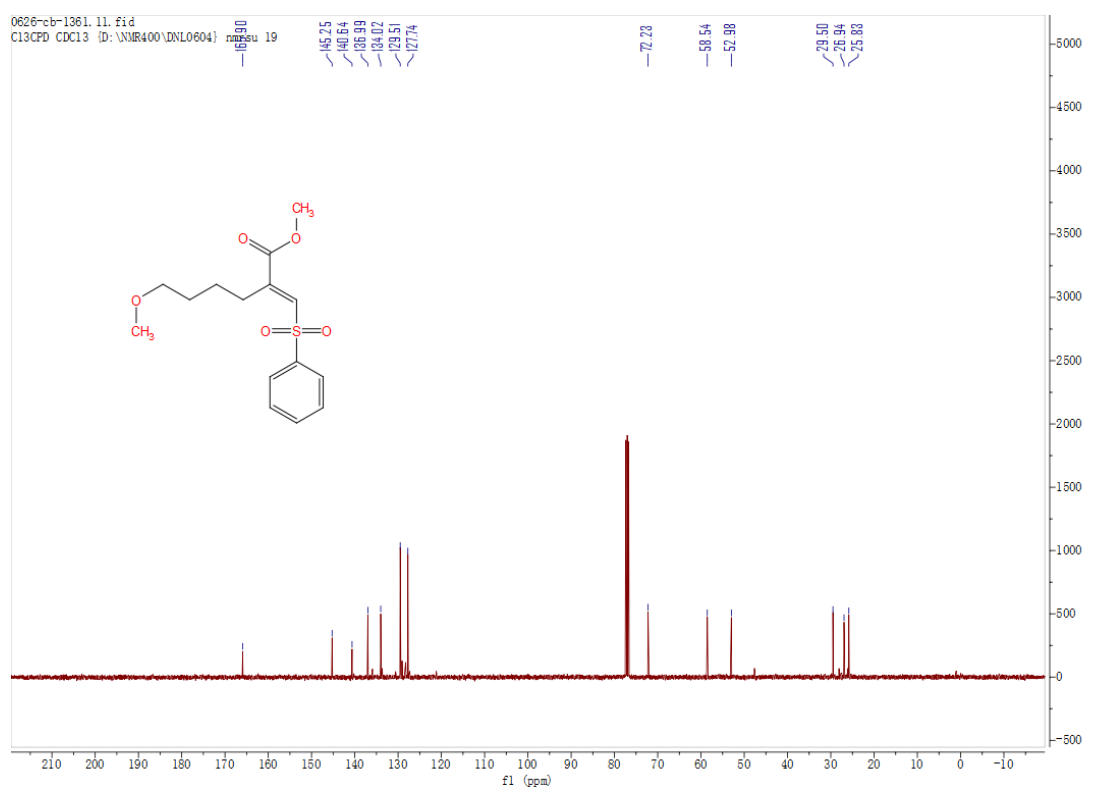

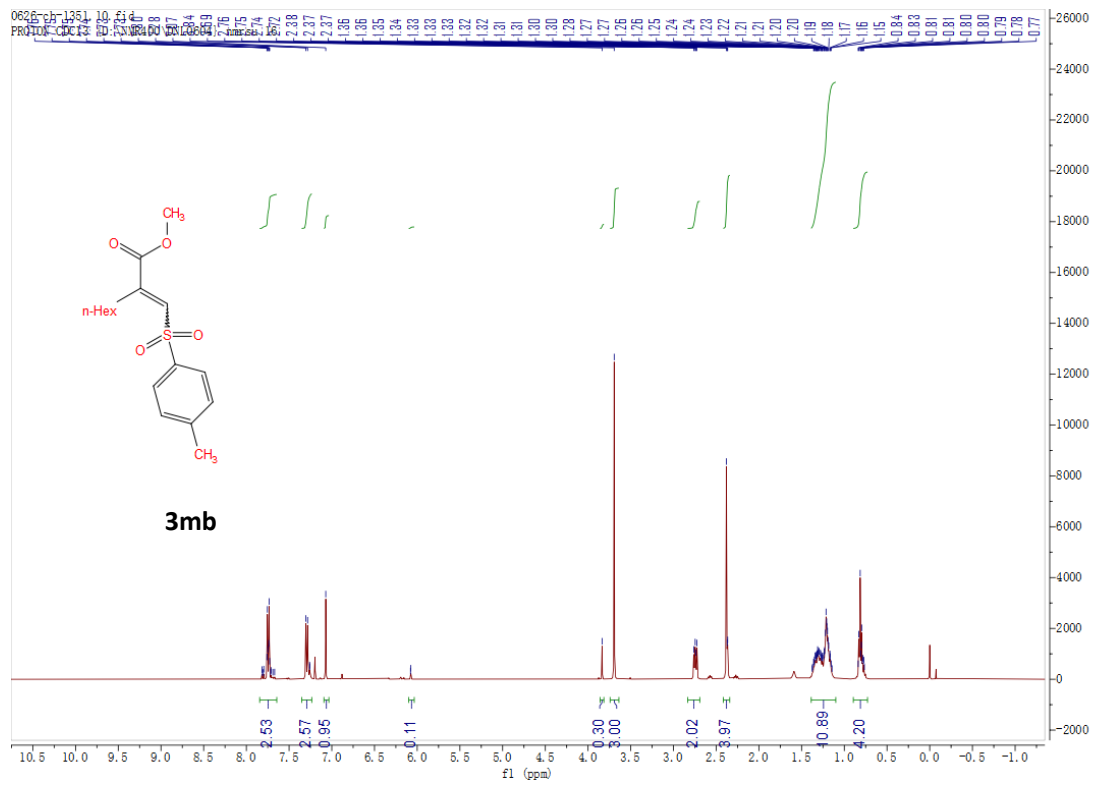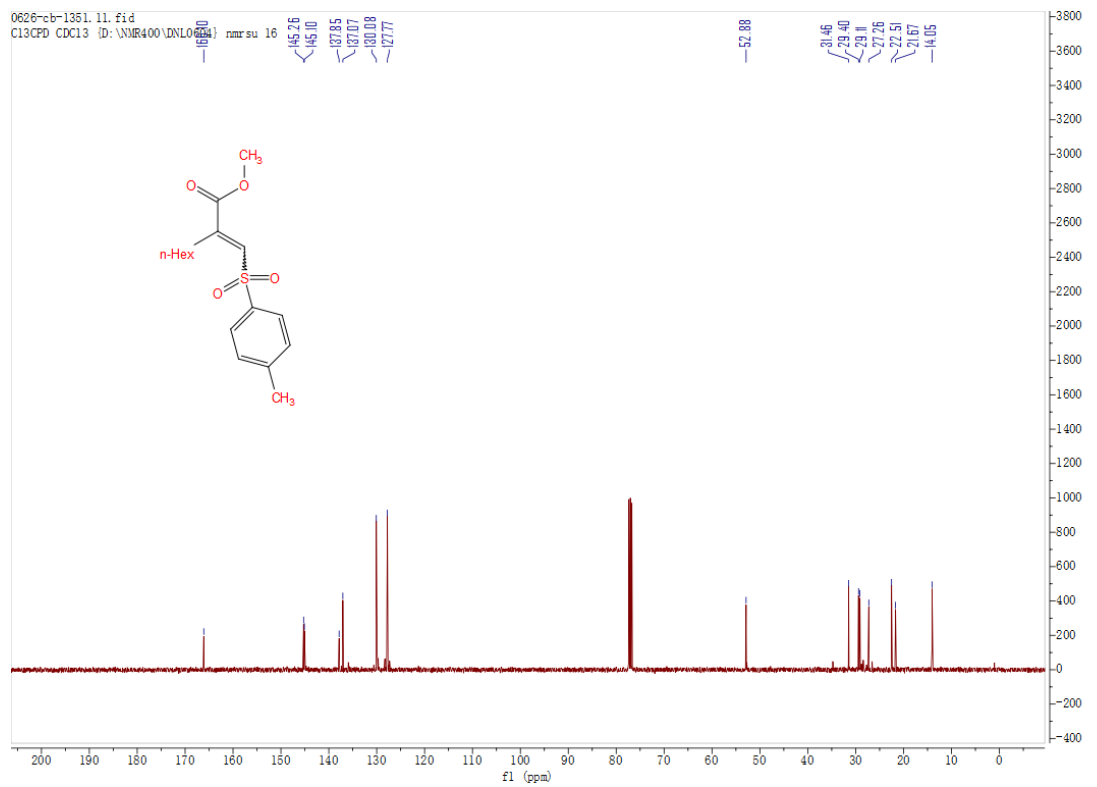

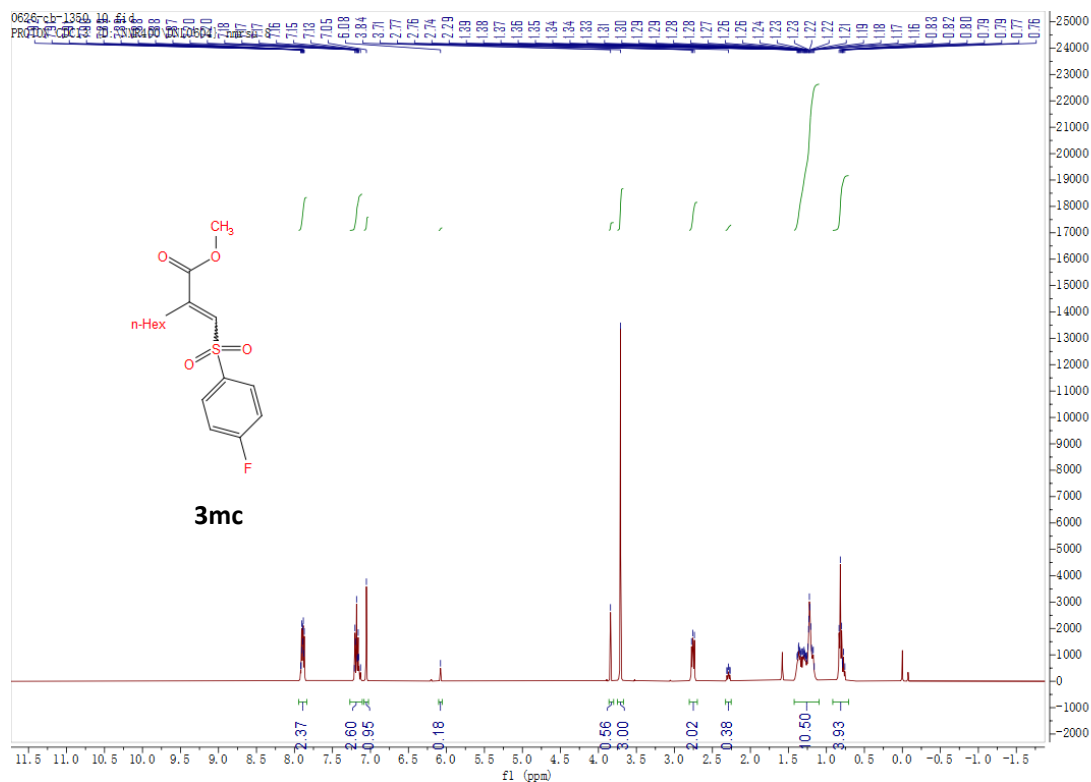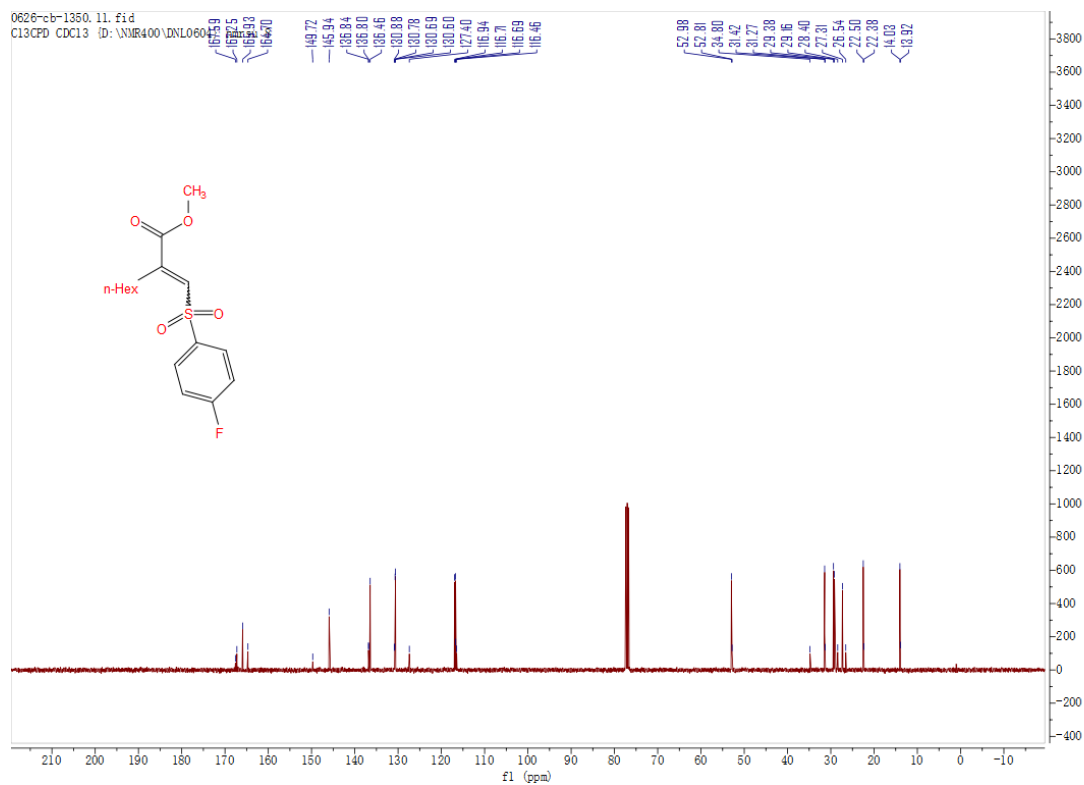

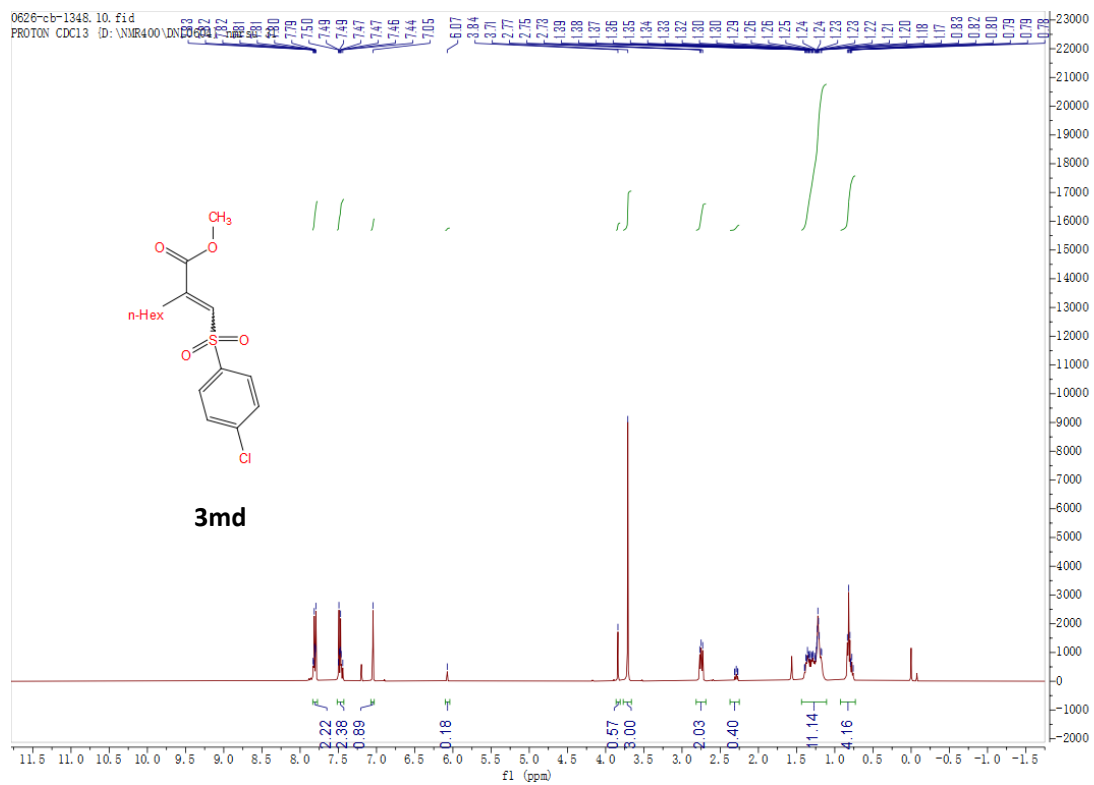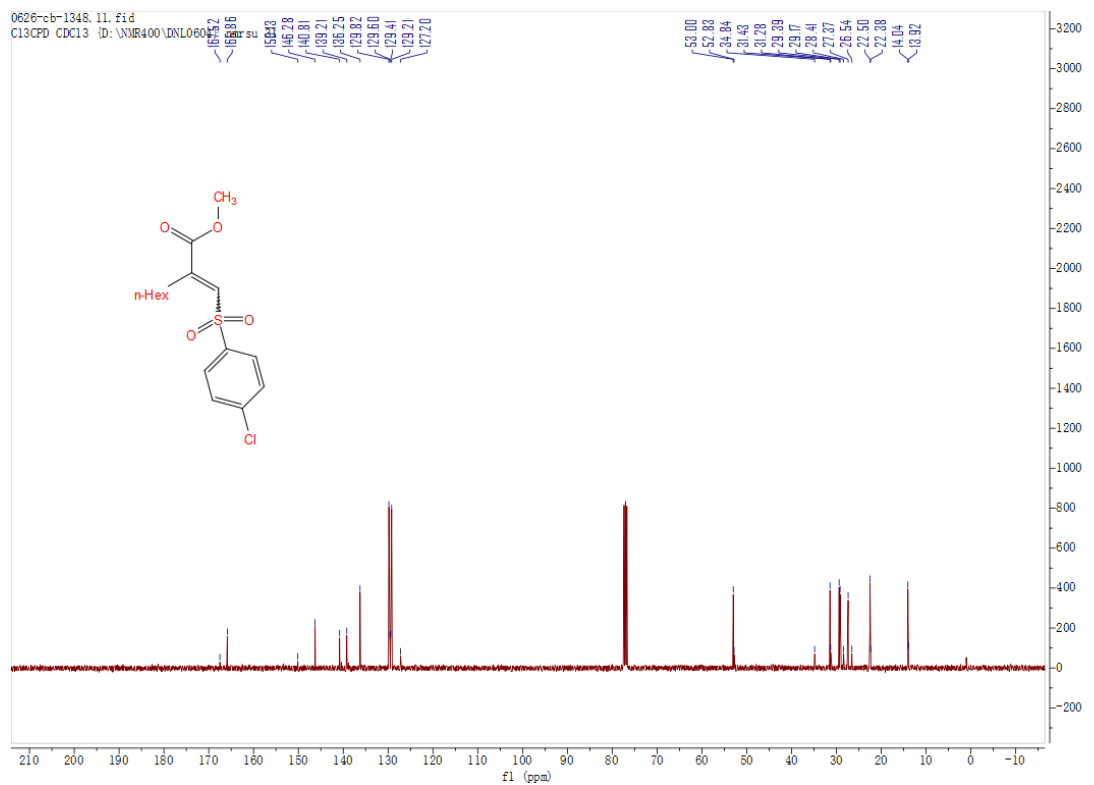

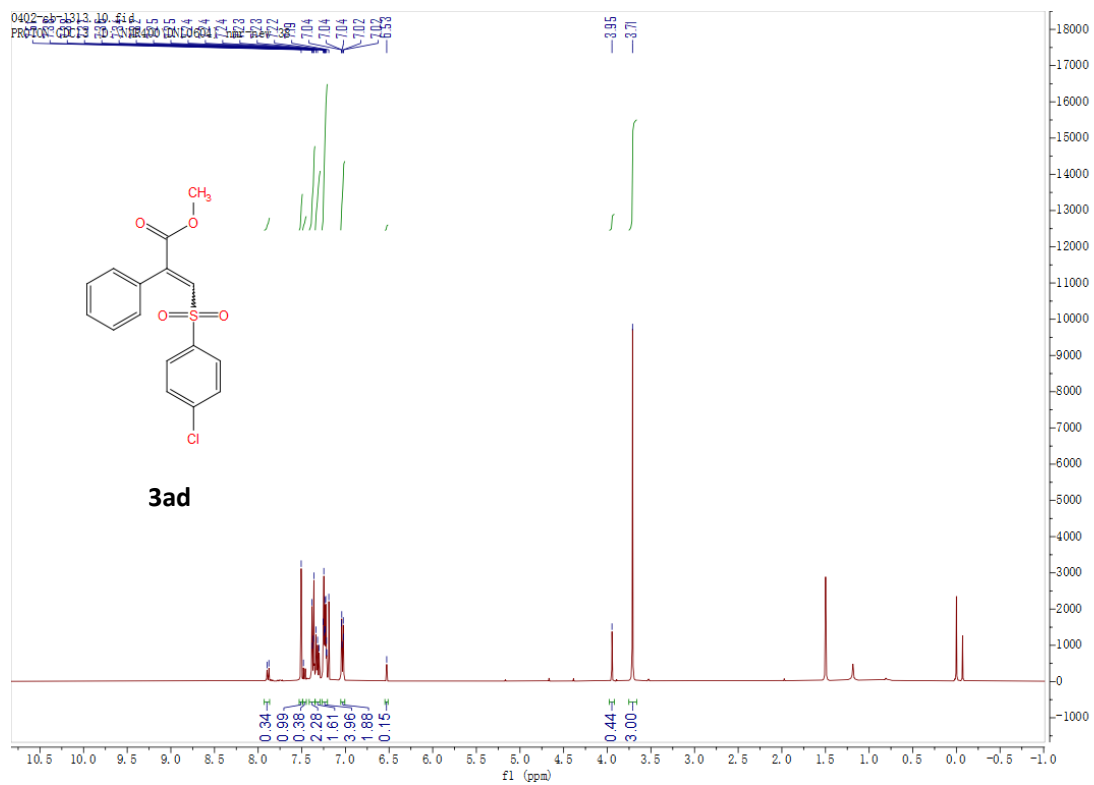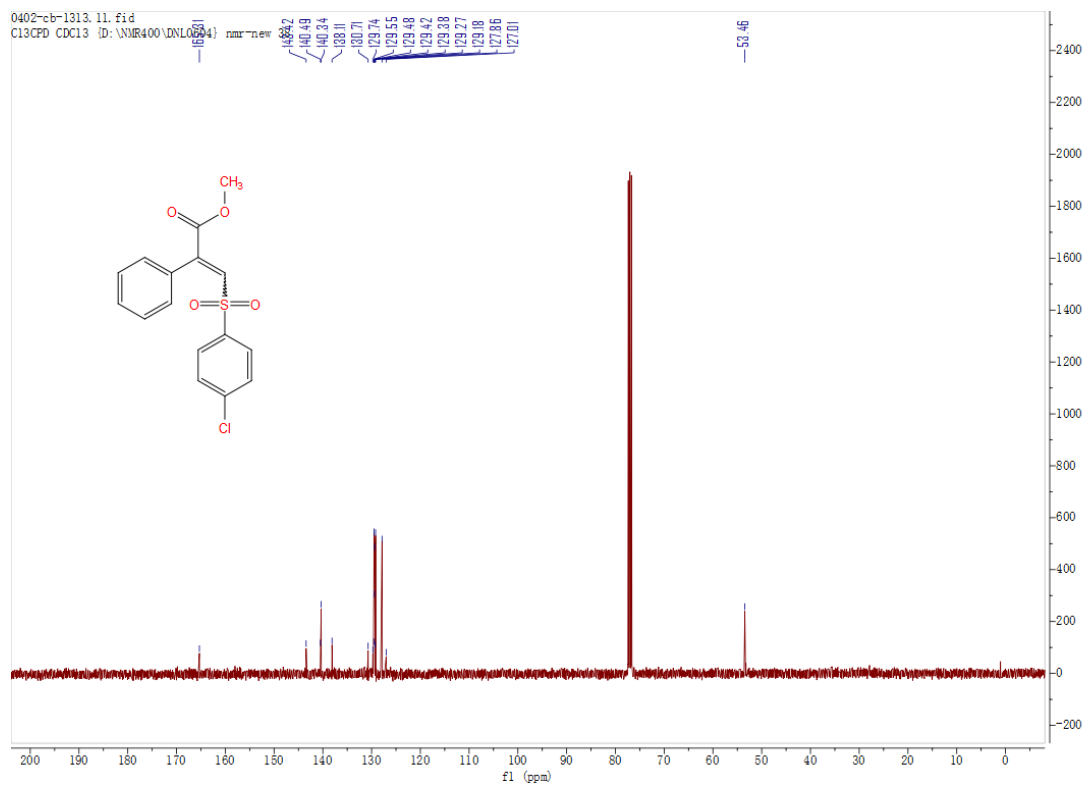

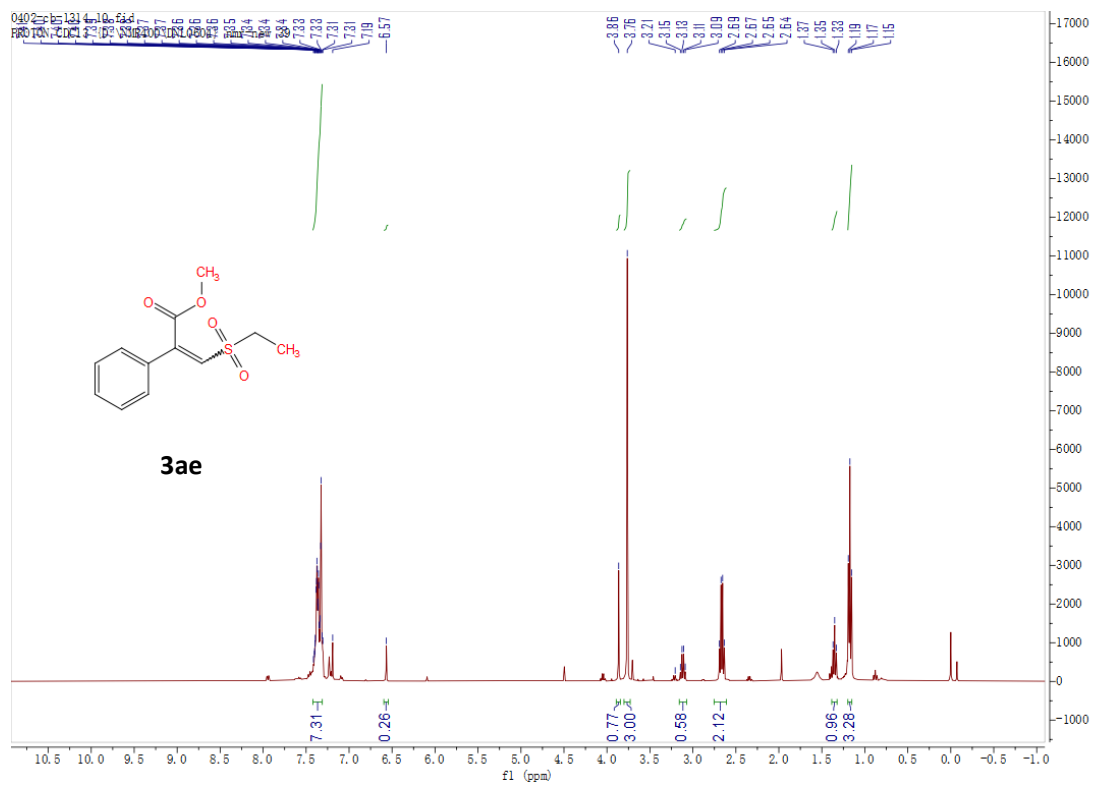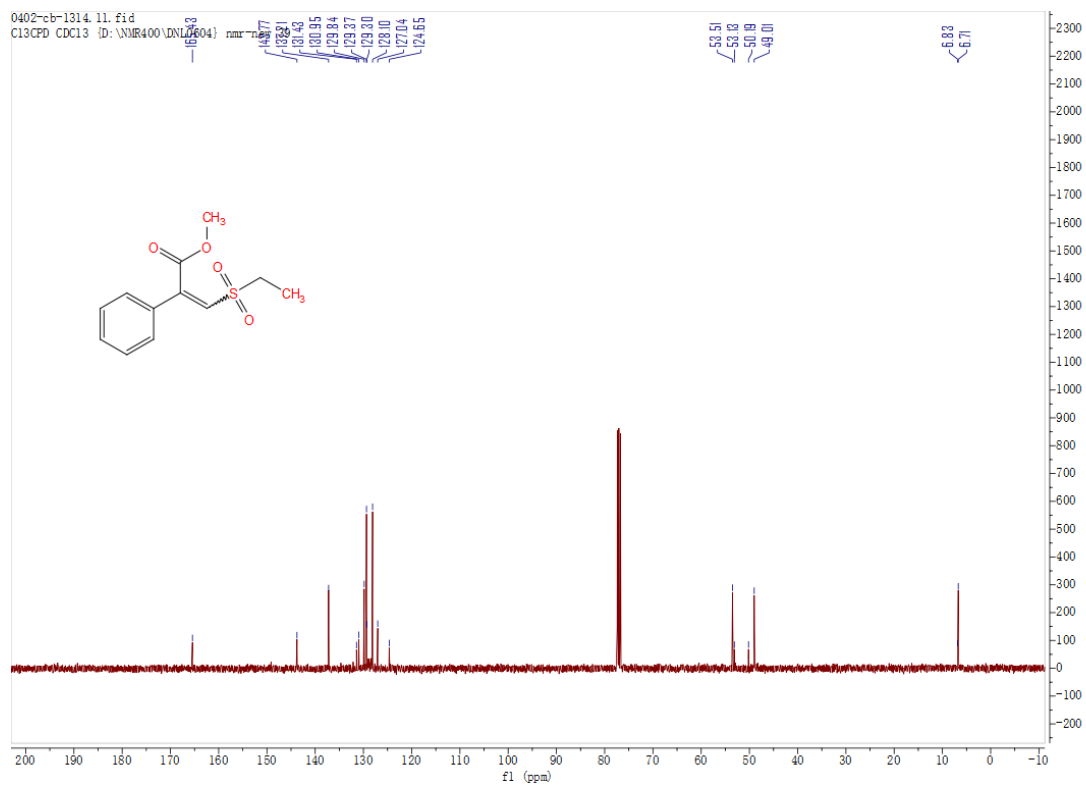

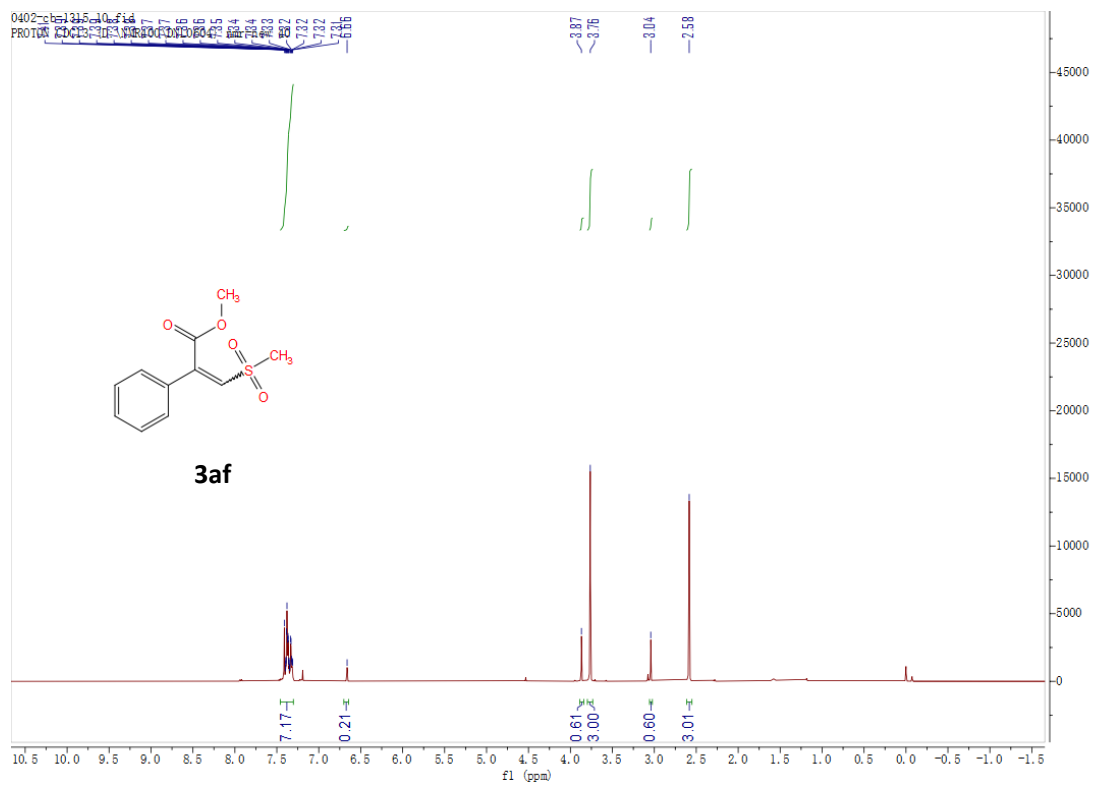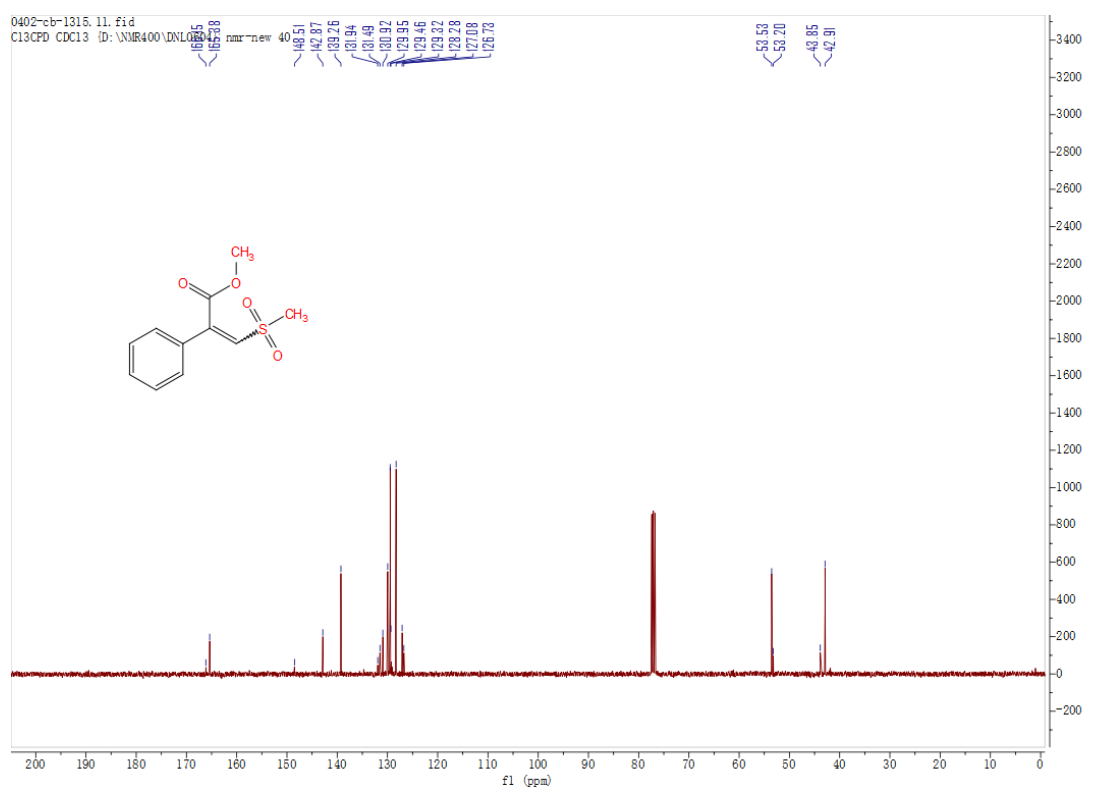



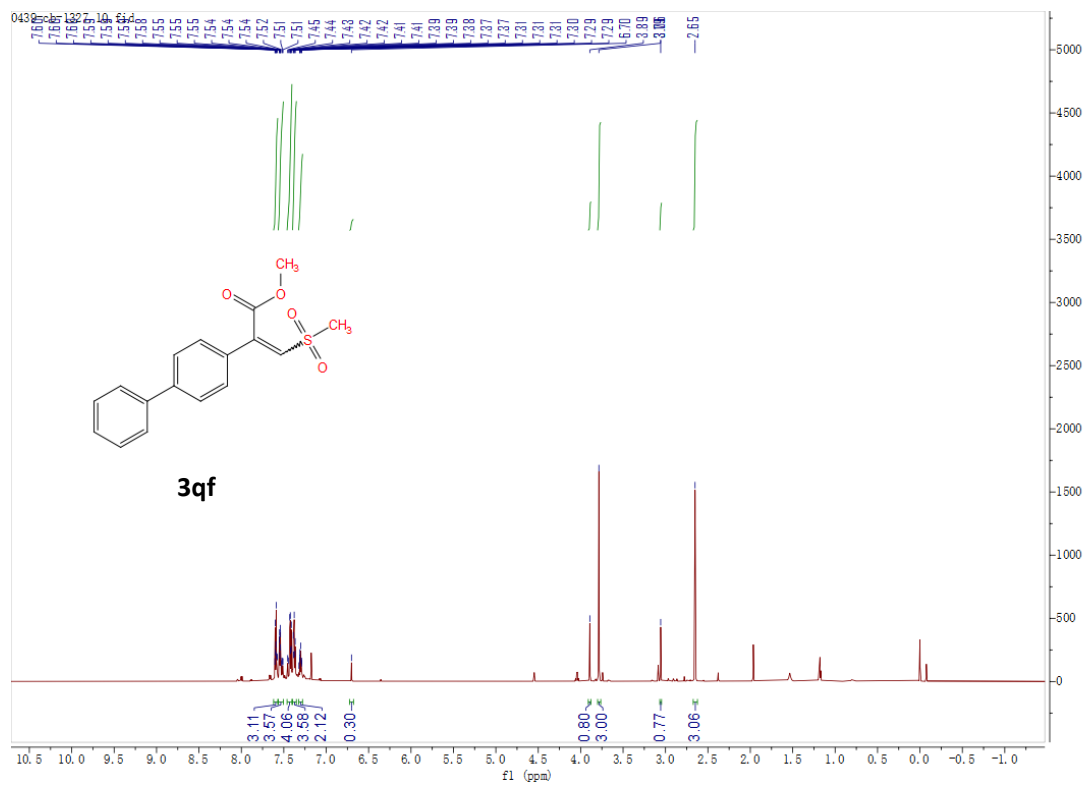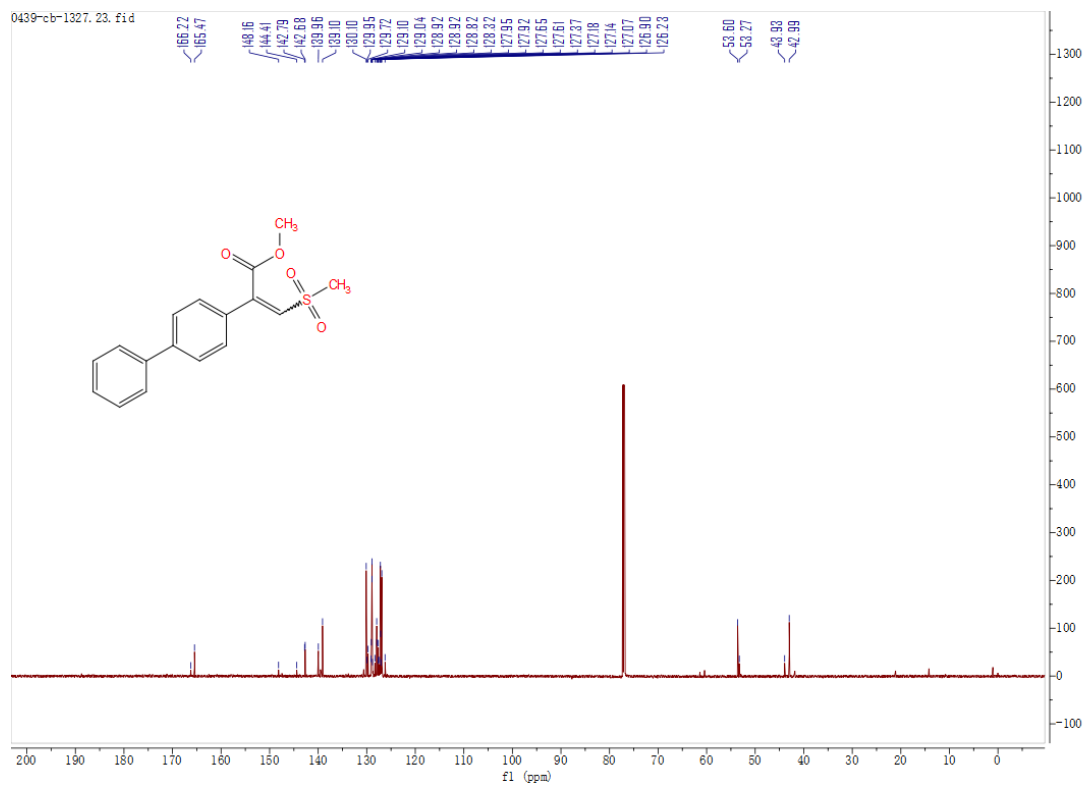

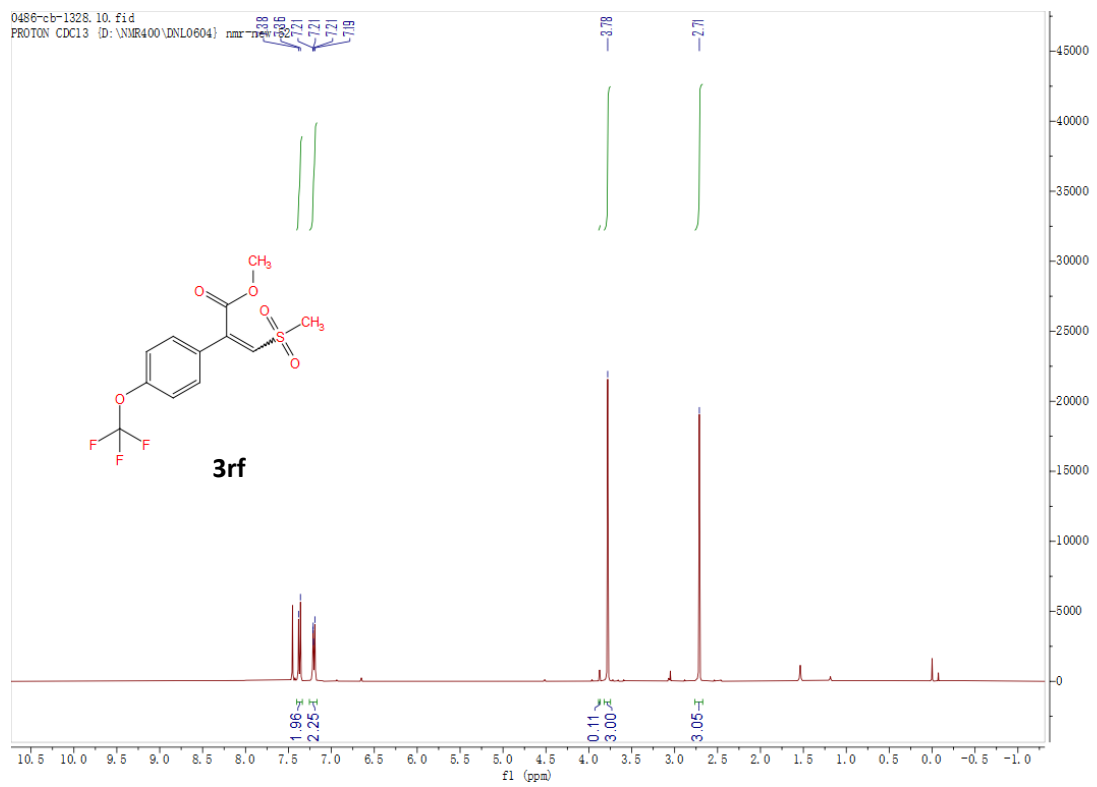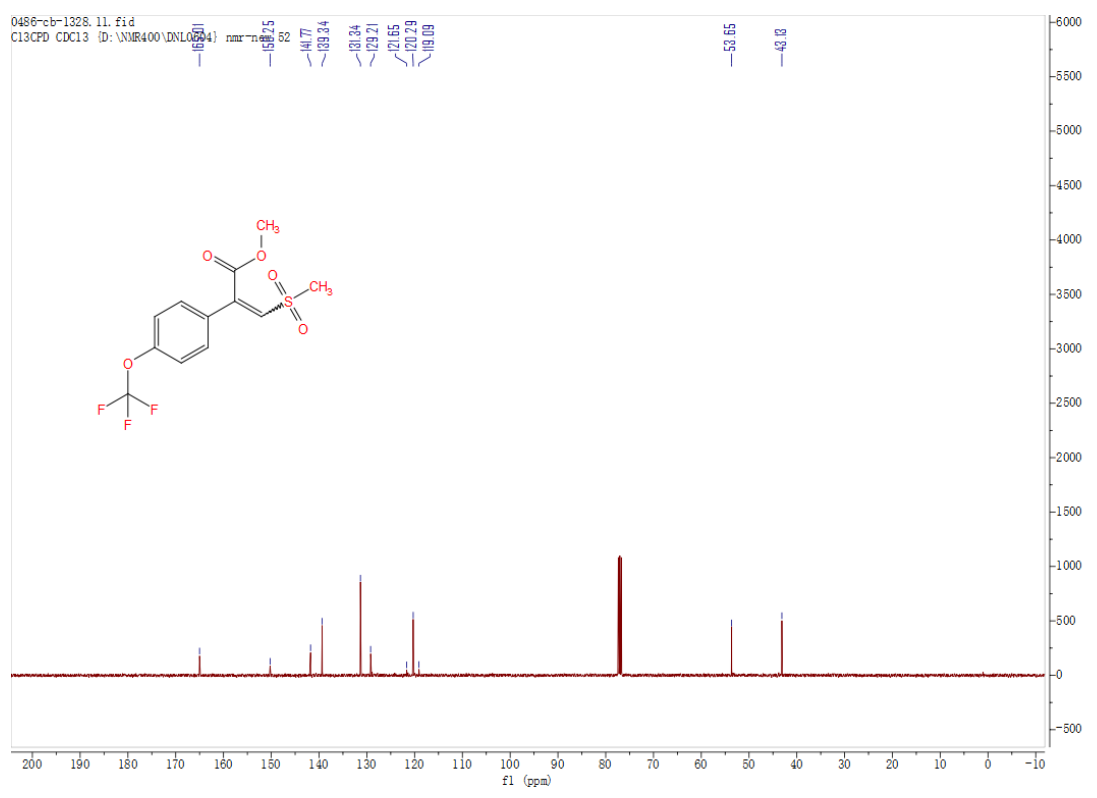

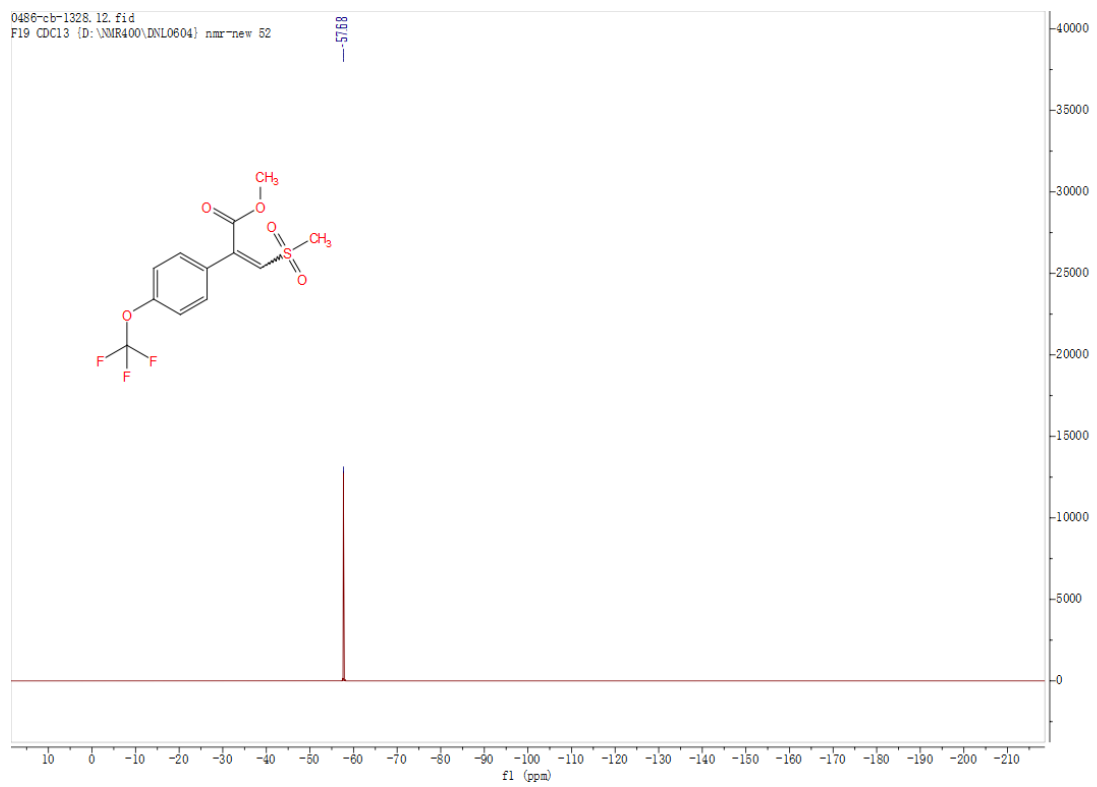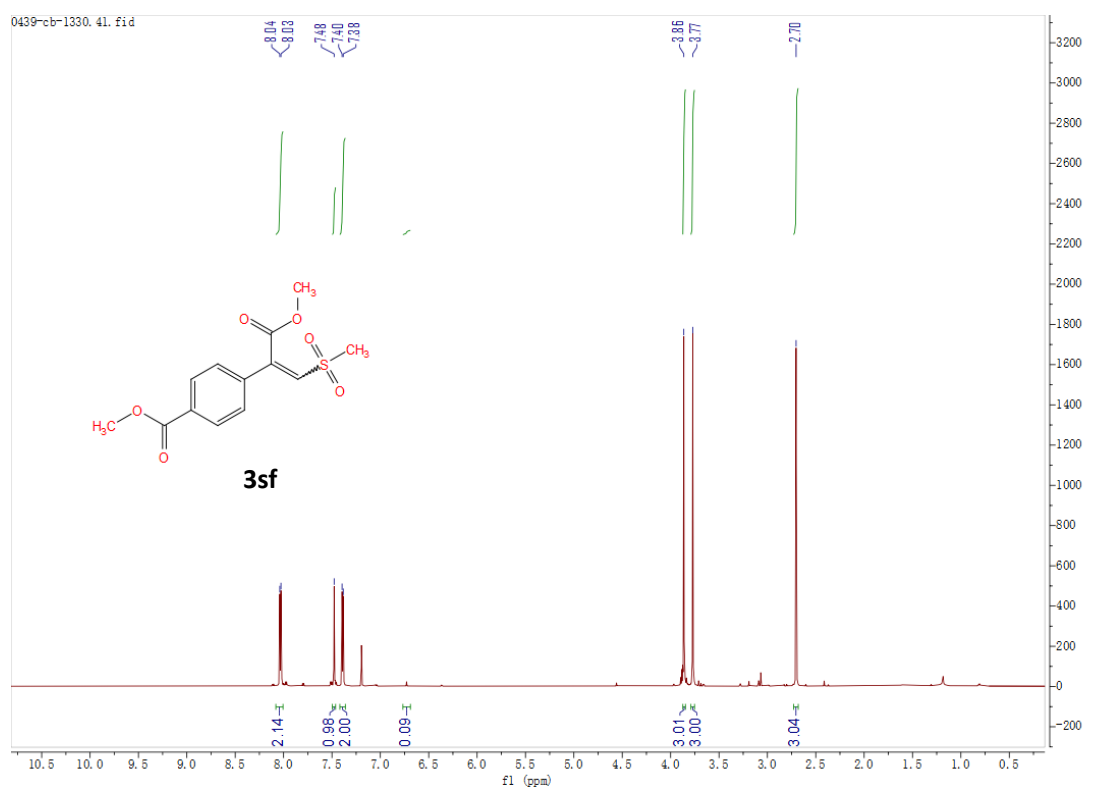

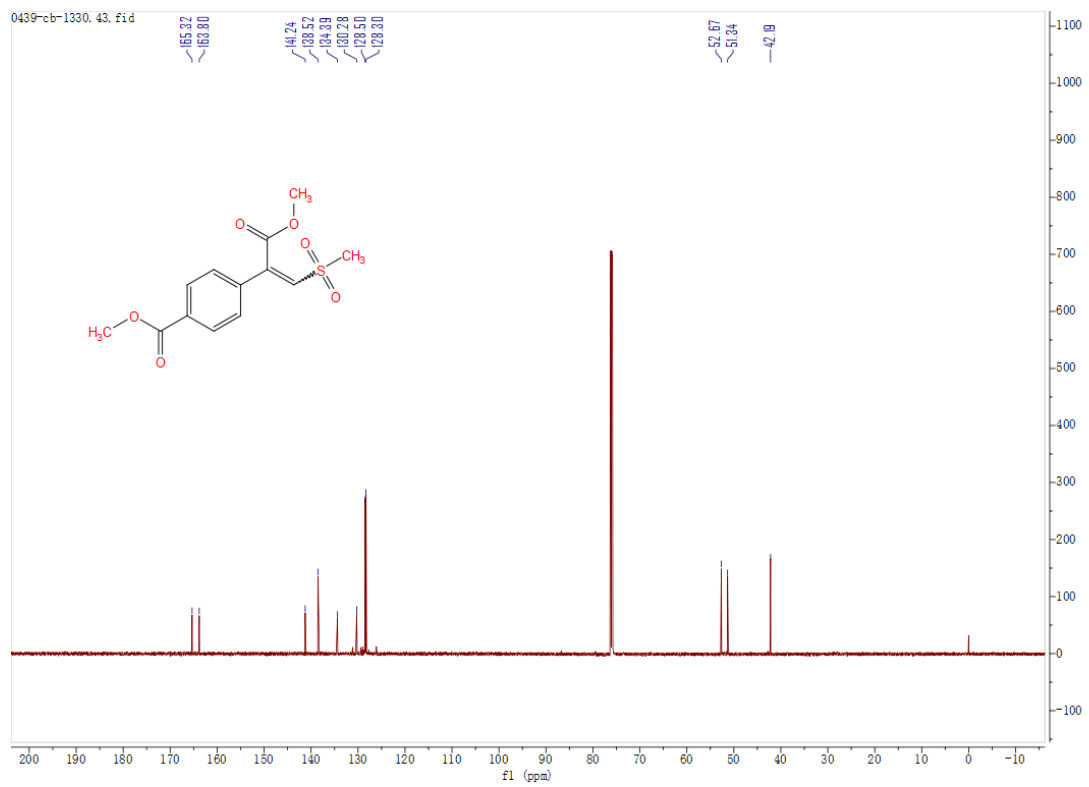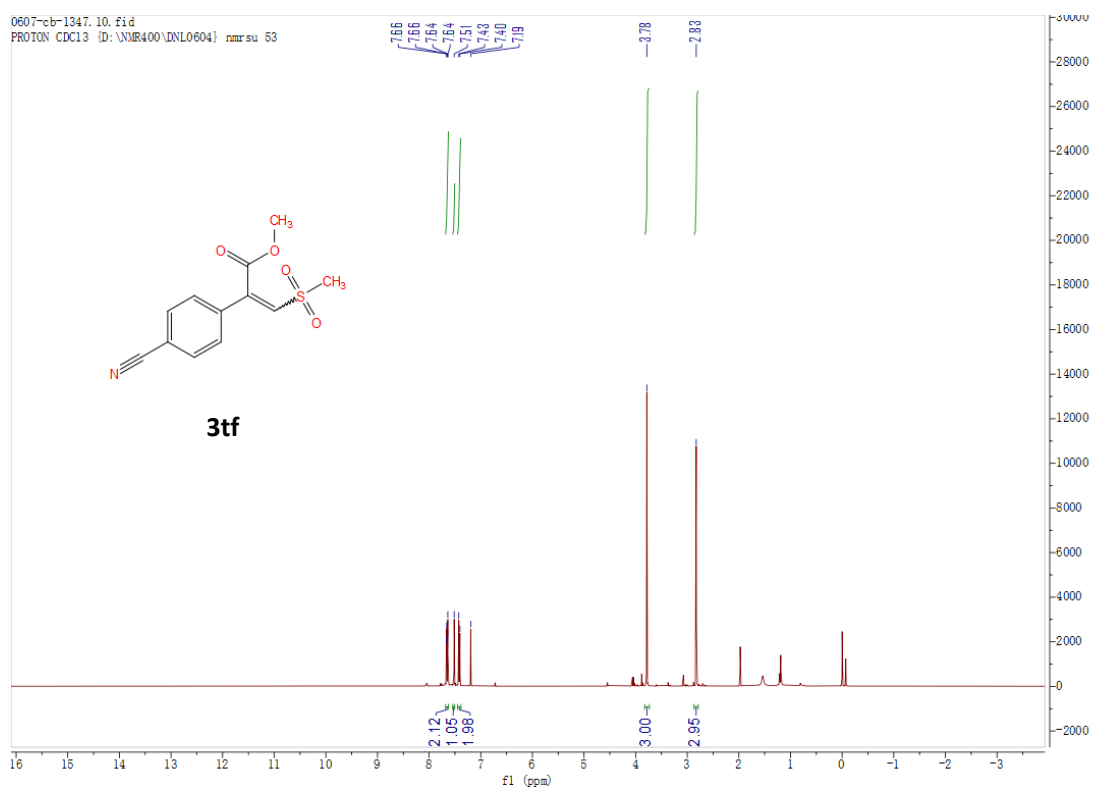

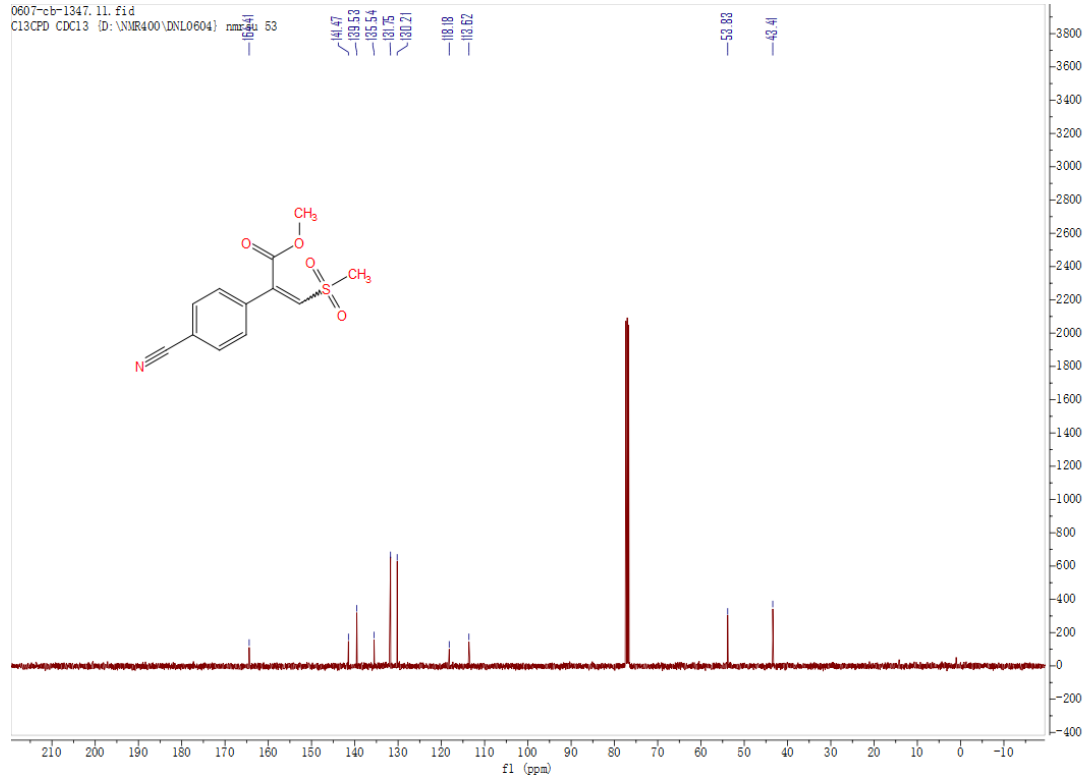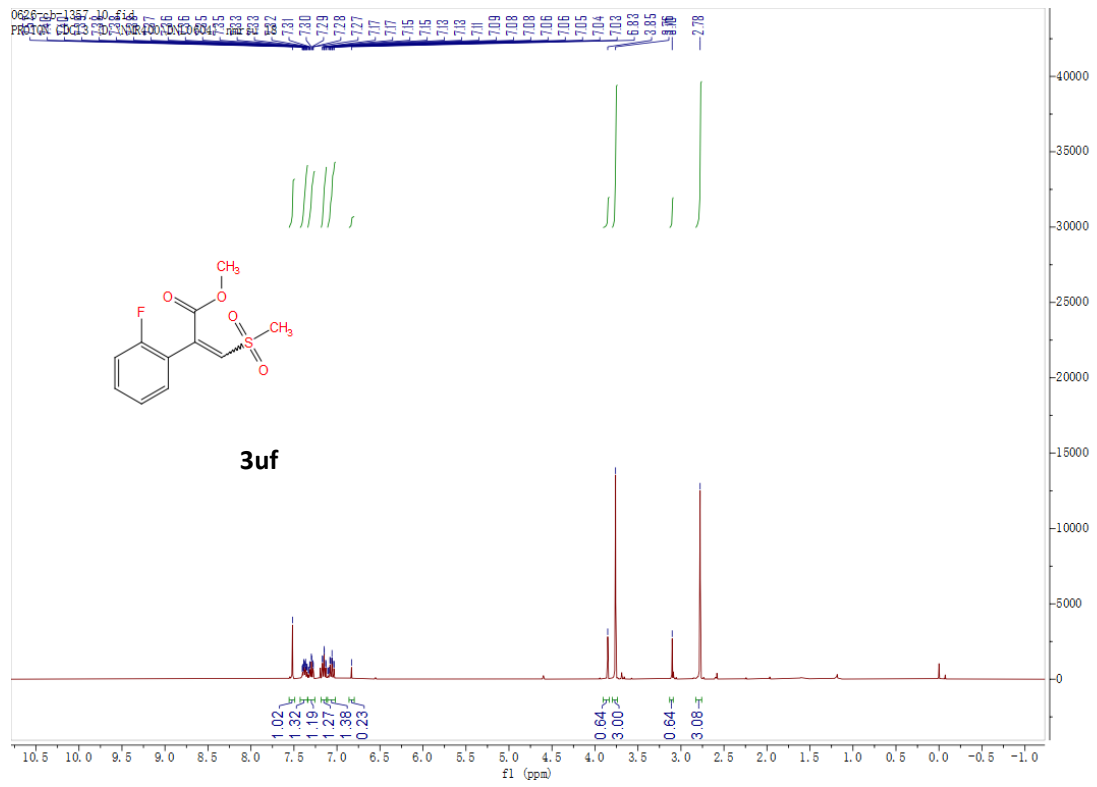

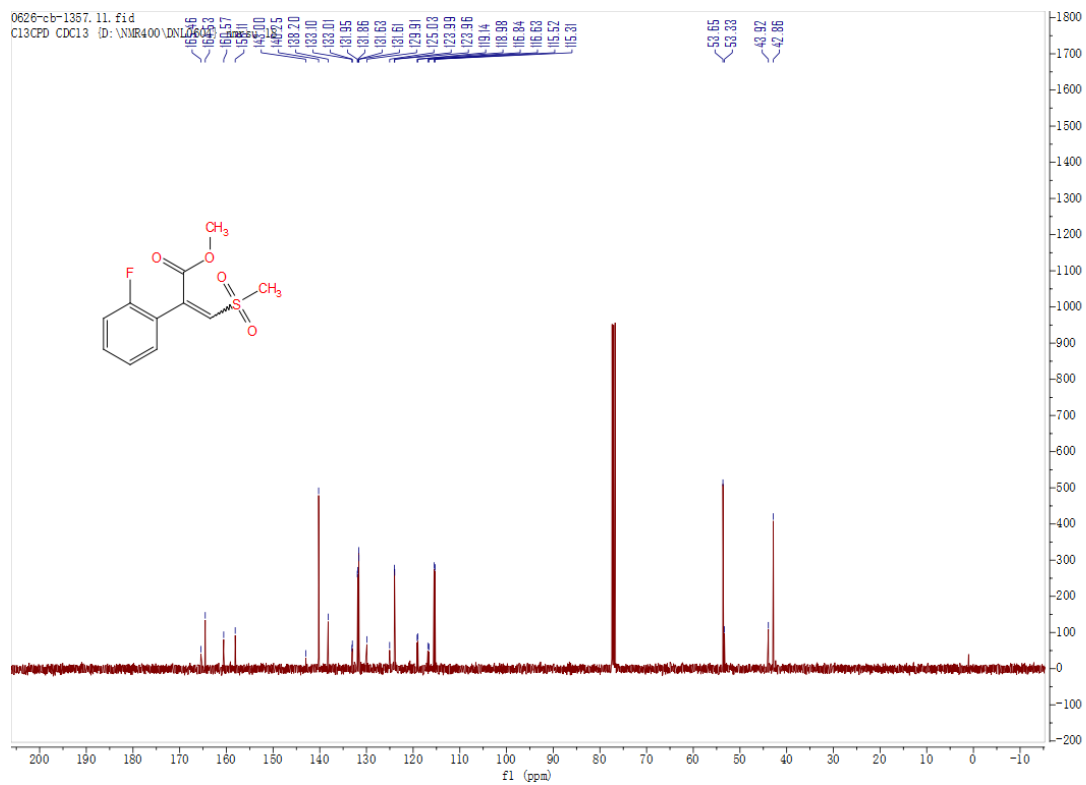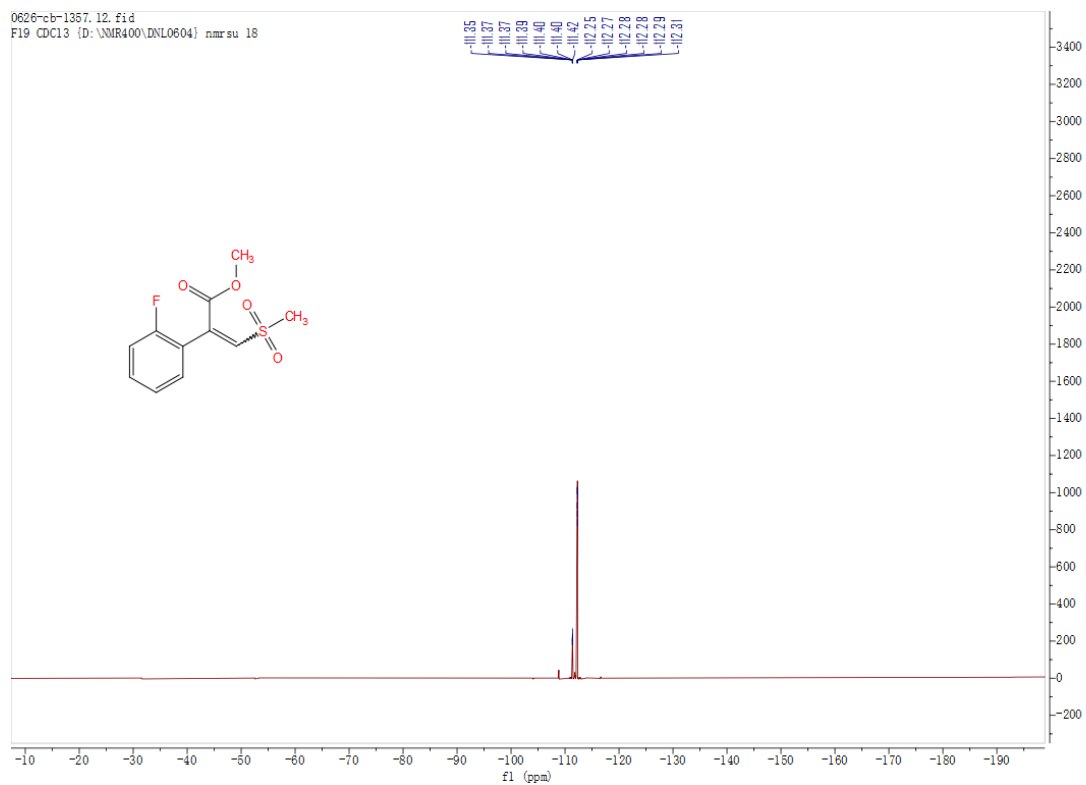

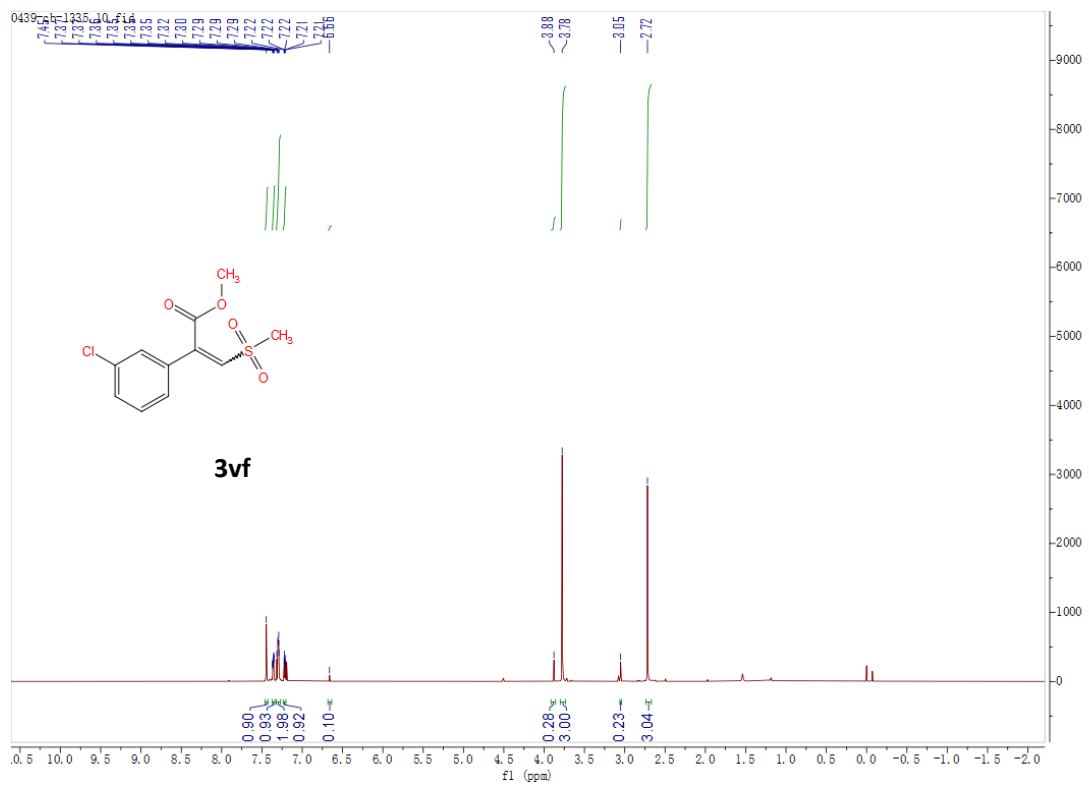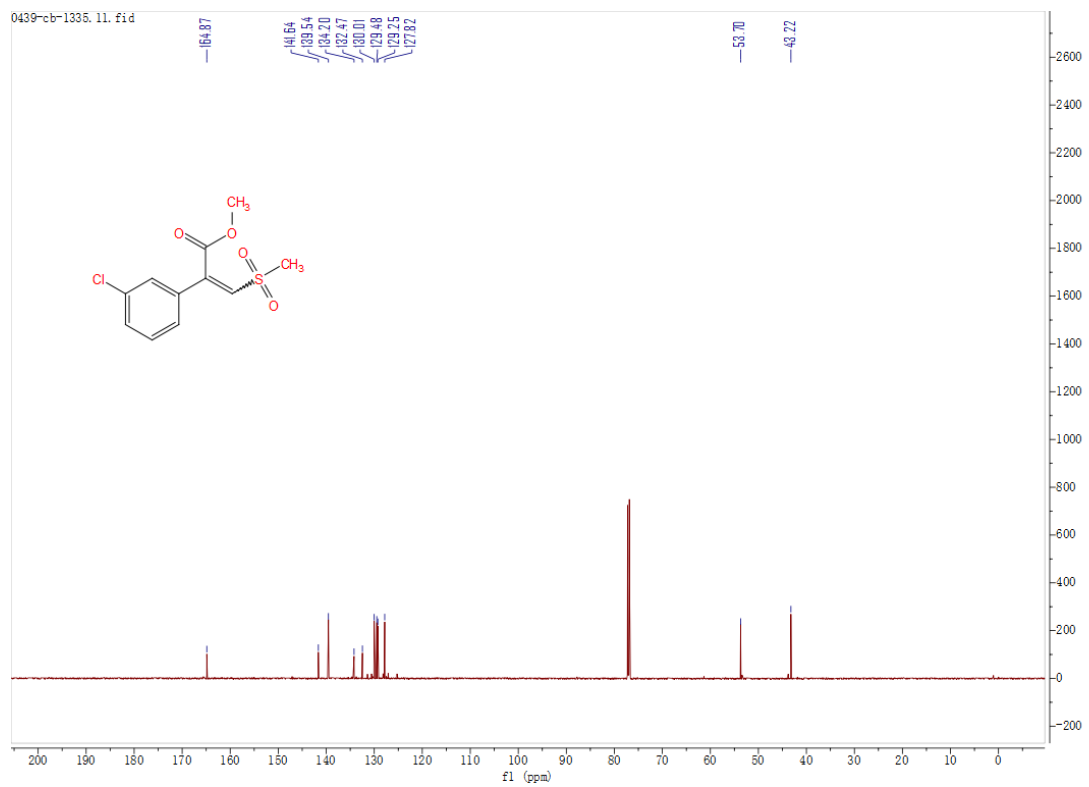

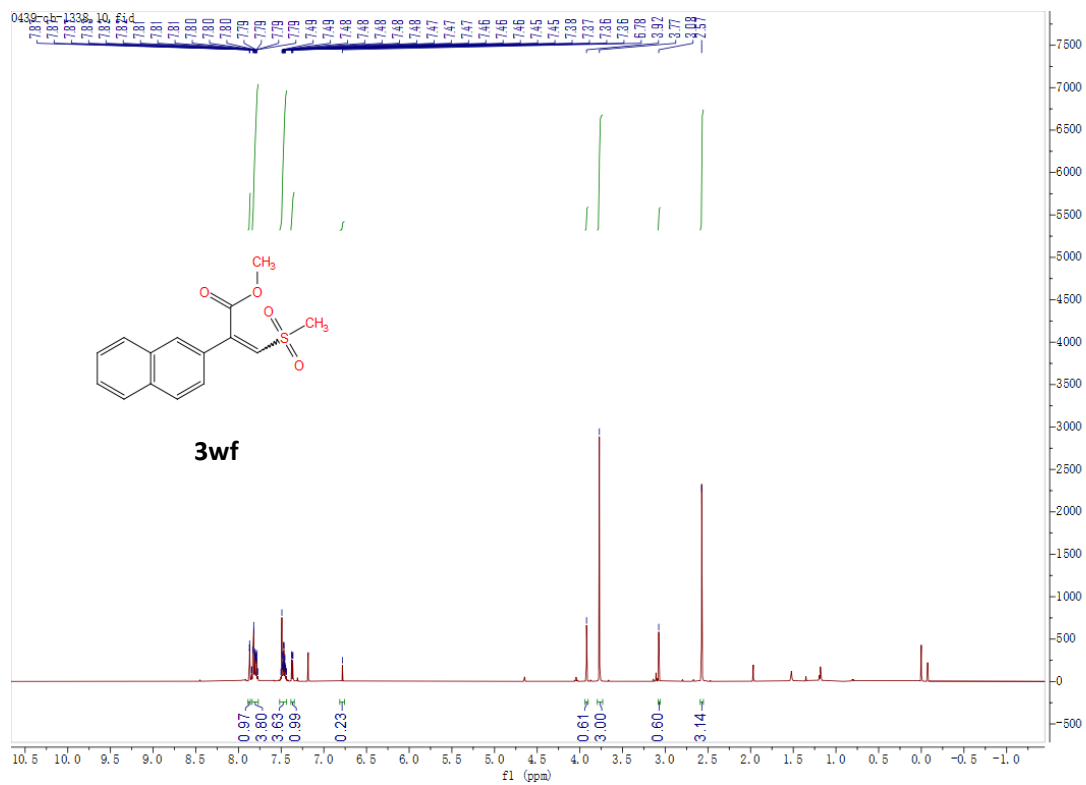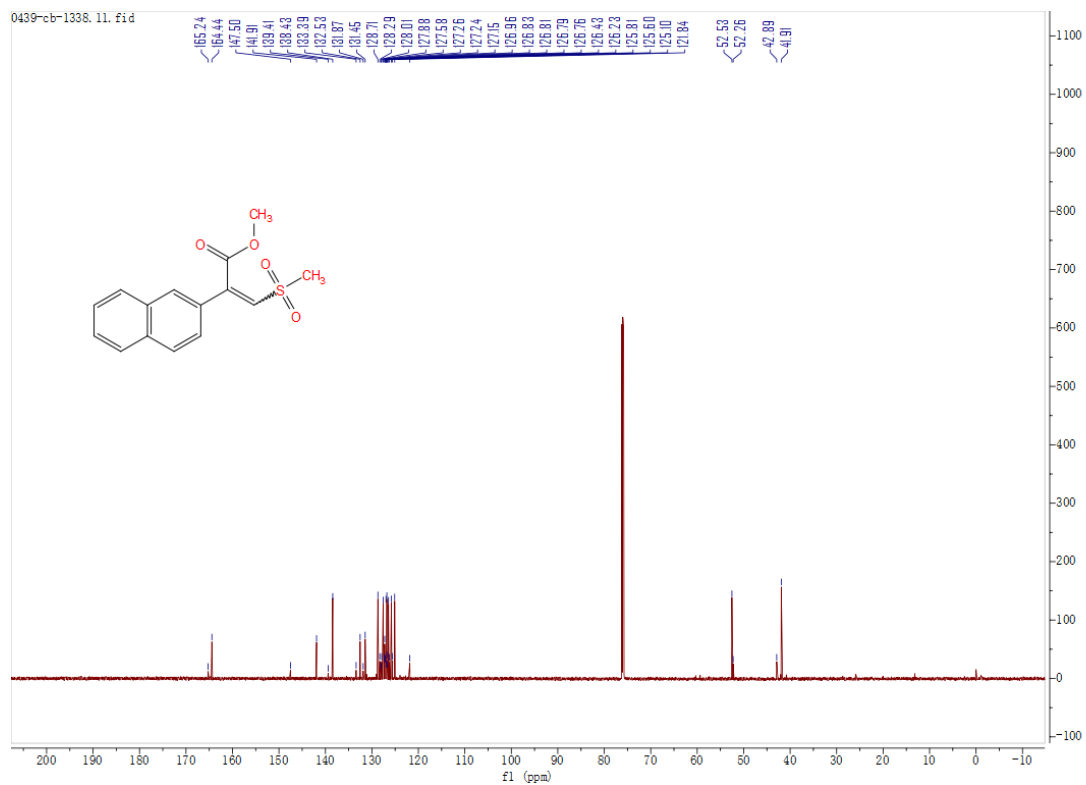



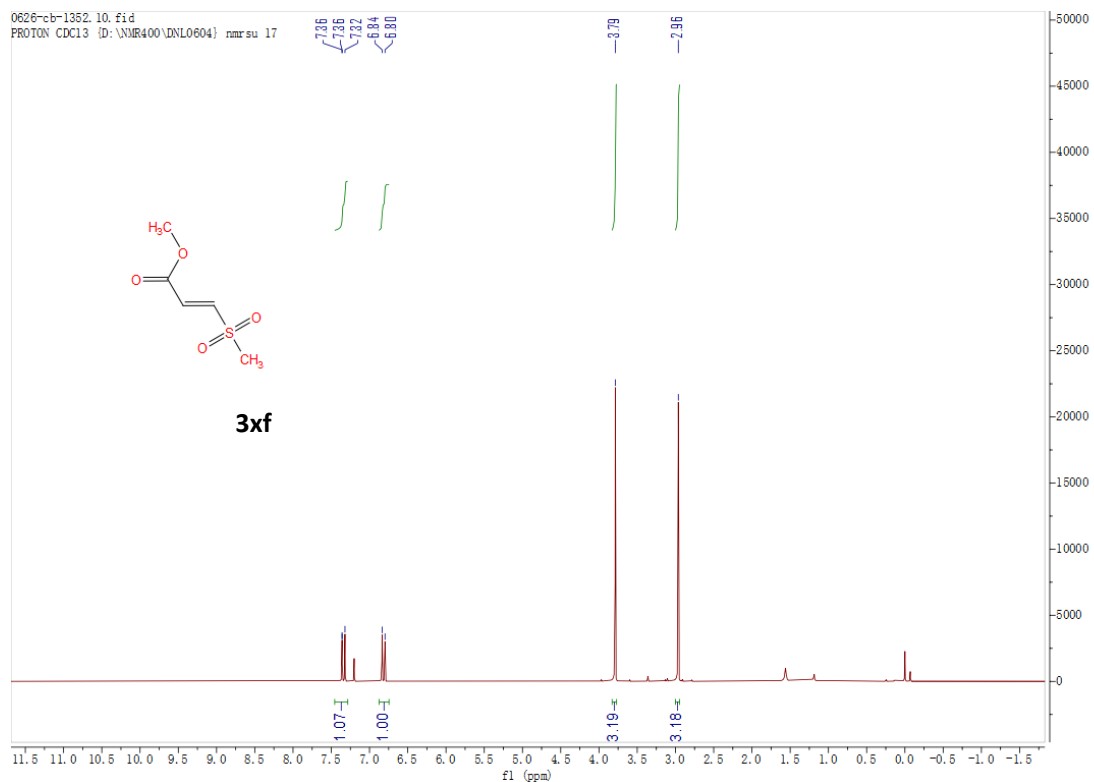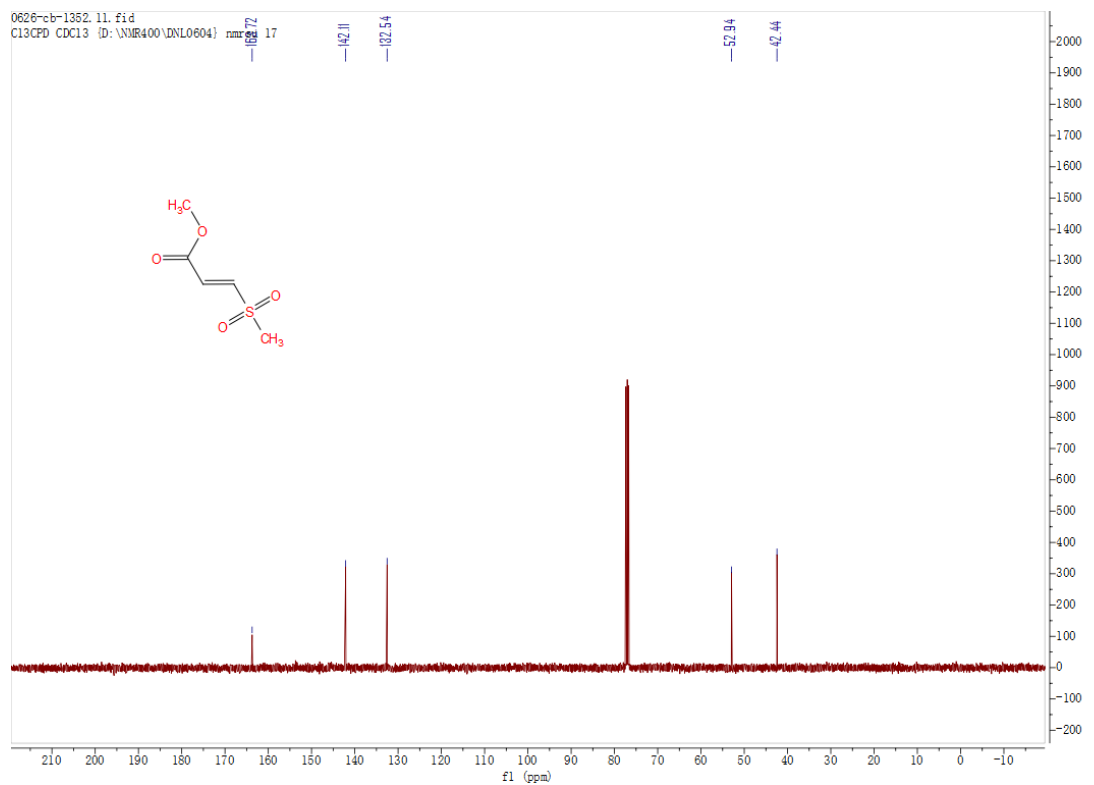

0626-cb-1362.10.fid  
PROTON CDCl3 (D:\NMR400\DNL0604) nmrsu 20

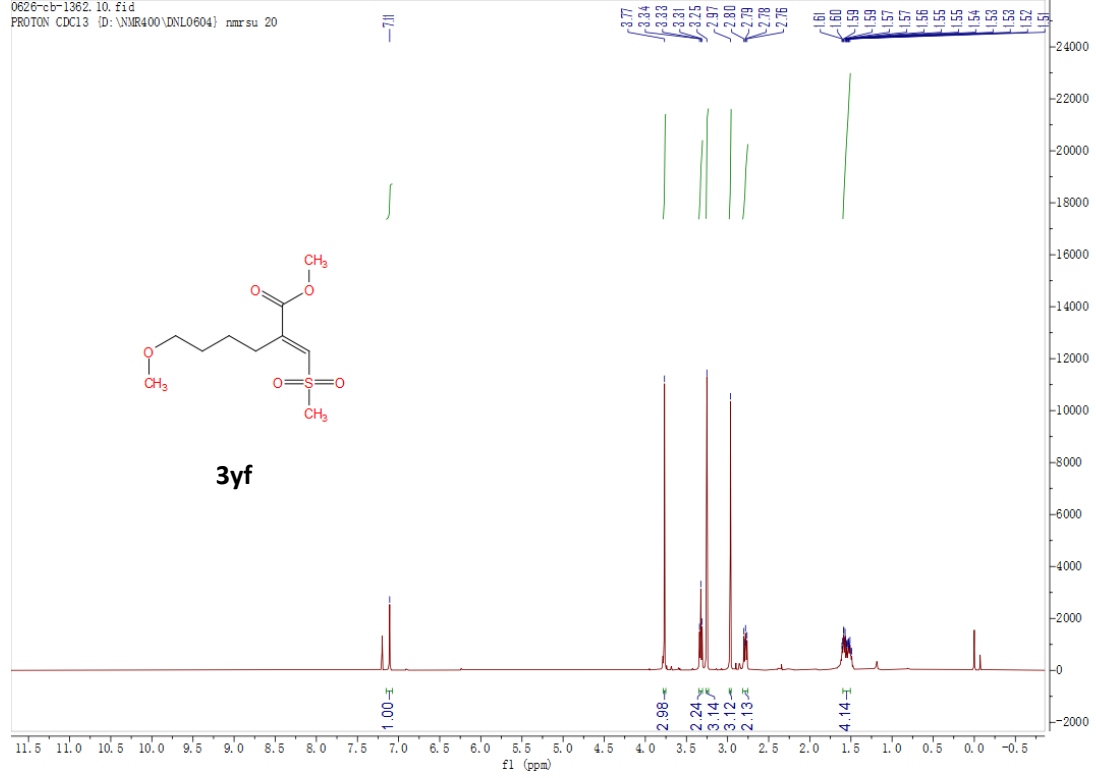

0626-cb-1362.11.fid  
C13CPD CDCl3 (D:\NMR400\DNL0604) nmrsu 20

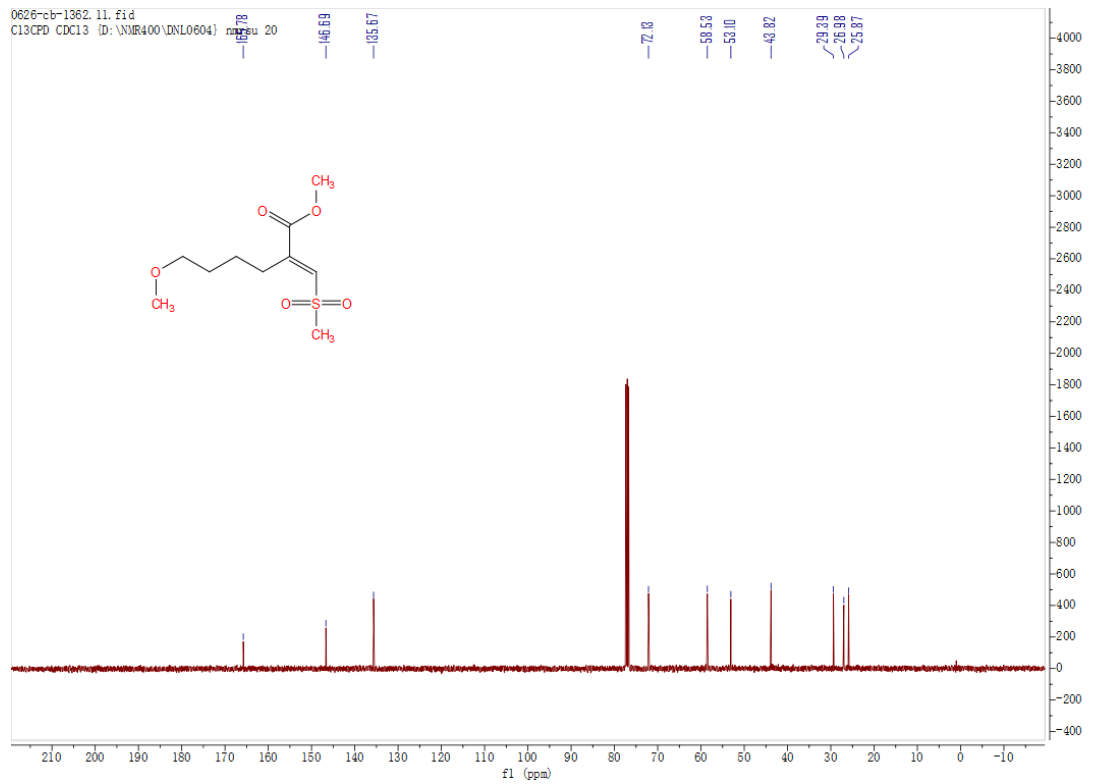

Supplement: d2qo01311h1.pdf [file d2qo01311h1.pdf]
